# Supplementary material for: Selective recognition and extraction of arsenate by a urea-functionalized tripodal receptor from competitive aqueous media
Source: Royal Society of Chemistry journal article supplement (doi:10.1039/d2dt02281h), 2022-01-01
Supplement: d2dt02281h1.pdf [file d2dt02281h1.pdf]

## Electronic Supplementary Information

# Selective recognition and extraction of arsenate by a urea-functionalized tripodal receptor from competitive aqueous media

Sandeep Kumar Dey,<sup>\*a,b</sup> Beatriz Gil-Hernández,<sup>c</sup> Vivekanand V. Gobre,<sup>d</sup> Dennis Woschko,<sup>e</sup> Sarvesh S. Harmalkar,<sup>d</sup> Firdaus Rahaman Gayen,<sup>a,b</sup> Biswajit Saha,<sup>a,b</sup> Rajib Lochan Goswamee,<sup>a,b</sup> and Christoph Janiak<sup>d</sup>

<sup>a</sup>Materials Science and Technology Division, CSIR-North East Institute of Science and Technology, Jorhat, Assam 785006, India. Email: [sandeep@neist.res.in](mailto:sandeep@neist.res.in).

<sup>b</sup>Academy of Scientific and Innovative Research (AcSIR), Ghaziabad-201002, Uttar Pradesh, India.

<sup>c</sup>Departamento de Química, Facultad de Ciencias, Sección Química, Universidad de La Laguna, 38206 La Laguna, Tenerife, Spain. Email: [beagher@ull.es](mailto:beagher@ull.es)

<sup>d</sup>School of Chemical Sciences, Goa University, Taleigao Plateau, Goa 403206, India. Email: [yvgobre@gu.ac.in](mailto:yvgobre@gu.ac.in).

<sup>e</sup>Institute of Inorganic and Structural Chemistry, Heinrich-Heine University, Düsseldorf 40225, Germany. Email: [janiak@uni.duesseldorf.de](mailto:janiak@uni.duesseldorf.de).

## Electronic Supplementary Information

### 1. Materials and experimental methods

All reagents and solvents were obtained from commercial sources and used as received without further purification. Tris(2-aminoethyl) amine (Tren), 3-nitrophenyl isocyanate, 4-nitrobenzoyl chloride, Pd 10% on carbon, hydrazine monohydrate and all quaternary ammonium (tetraalkylammonium) salts were purchased from Sigma-Aldrich (Merck) or TCI Chemicals. Solvents (analytical grade) for synthesis and crystallization experiments were purchased from Merck, and used without further purification.

$^1\text{H}$ , and  $^{31}\text{P}$  NMR spectra were recorded on a Bruker FT-400 MHz instrument and chemical shifts were recorded in parts per million (ppm) on the scale using tetramethylsilane or residual solvent peak as a reference and  $^{13}\text{C}$  spectra were obtained at 100 MHz at 298 K. Powder X-ray diffraction patterns of dried crystalline powder were recorded using a Bruker-D8 X-ray diffractometer with Cu- $K\alpha$  radiation at  $\lambda = 0.15418 \text{ \AA}$ . HR-MS analyses were carried out using Xevo XS QToF mass spectrometer, Waters ACQUITY UHPLC. UV-vis spectral analyses were carried out using a Perkin-Elmer spectrophotometer at 298 K.

### 2. Synthesis and characterization of urea-functionalized tripodal receptor **L**

Tris(4-amino-N-ethylbenzamide)amine (**AL**) was synthesized following the recently published literature procedure.<sup>1</sup> Receptor **L** was synthesized by the reaction of **AL** with 3-nitrophenylisocyanate in a 1:3.2 molar ratio at room temperature (Scheme S1). In a 50 mL flat bottom flask, 500 mg of **AL** (1 mmol) was dissolved in 10 mL of dimethylformamide (DMF) and 0.520 g of 3-nitrophenylisocyanate (3.2 mmol) was added into the above solution mixture and was allowed to stir at room temperature (25–30 °C) for about 12 hours. The solution was then filtered in a 25 ml beaker and allowed to remain at room temperature for crystallization. Pale yellow solid of the receptor precipitated out from the DMF solution in quantitative yield within 2-3 days. The precipitated compound was collected by filtration and washed with 30 mL methanol (3 x 10 mL). The compound was then dissolved in 5 mL DMF for recrystallization to ensure its purity for spectroscopy analysis. The precipitated compound was again collected by filtration and washed with 30 mL methanol (3 x 10 mL) and dried at room temperature. The compound was characterized by NMR spectroscopy in DMSO- $d_6$  and HR-MS in acetonitrile.

Isolated yield of **L** after recrystallization: 625 mg (% yield 62%, based on three experimental runs). The compound is soluble in dimethylformamide, dimethyl sulfoxide, and acetone, insoluble in acetonitrile, chloroform/dichloromethane and methanol/ethanol.

Characterization of **L**:  $^1\text{H}$ -NMR (400 MHz, DMSO- $d_6$ ) chemical shift in  $\delta$  ppm: 2.50 (Residual DMSO), 2.72 (t,  $J = 8 \text{ Hz}$ , 3xNCH<sub>2</sub>), 3.38 (3xCH<sub>2</sub> + H<sub>2</sub>O), 7.52 (t,  $J = 8 \text{ Hz}$ , 9xCH), 7.66 (d,  $J = 8 \text{ Hz}$ , 3xCH), 7.79 (d,  $J = 8 \text{ Hz}$ , 9xCH), 8.51 (d,  $J = 4 \text{ Hz}$ , 3xCH), 8.26 (t,  $J = 4 \text{ Hz}$ , 3x Amide-NH), 9.03 (s, 3x Urea-NH <sub>$\alpha$</sub> ), 9.24 (s, 3x Urea-NH <sub>$\beta$</sub> ).

$^{13}\text{C}$ -NMR (100 MHz, DMSO- $d_6$ ) chemical shift in  $\delta$  ppm: 42.9 (3xCH<sub>2</sub>), 58.7 (3xCH<sub>2</sub>), 117.4 (3xCH), 121.7 (3xCH), 122.7 (3xCH), 129.62 (3xCH), 133.2 (3xCH), 135.3 (3xCH), 146.0 (3xCH), 147.1 (3xCH), 153.3 (3xCH), 157.4 (3xC=O), 171.1 (3xC=O).

HR-MS of **L** (negative ion):  $m/z$  994.380 [**L**-H<sup>+</sup>]<sup>-</sup> and 995.388 [**L**]

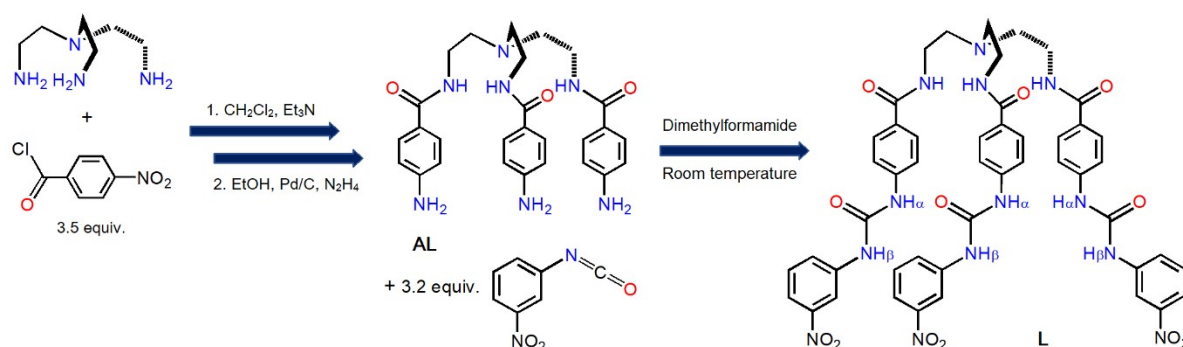

Scheme S1. Synthesis of hydrogen bond donor tripodal receptor **L**.

## Electronic Supplementary Information

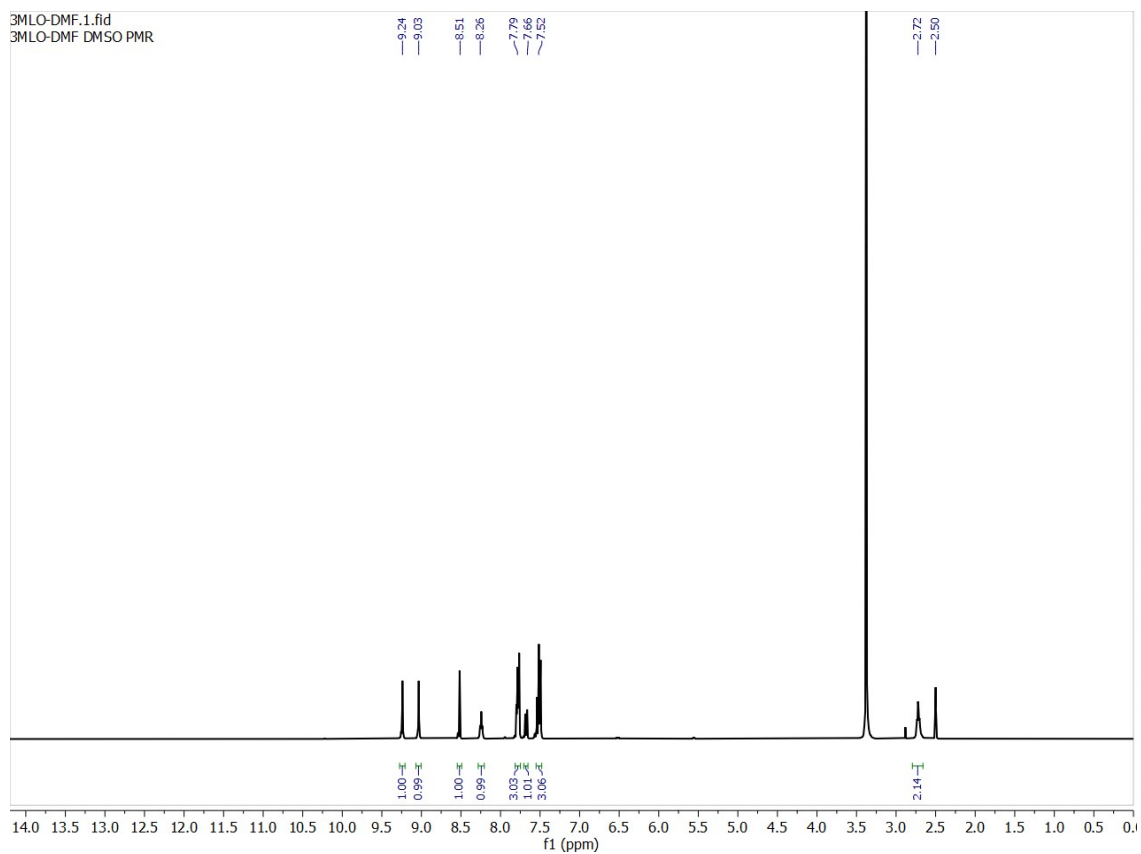

Fig. S1.  $^1\text{H}$ -NMR spectrum of receptor **L** in  $\text{DMSO-d}_6$  (400 MHz).

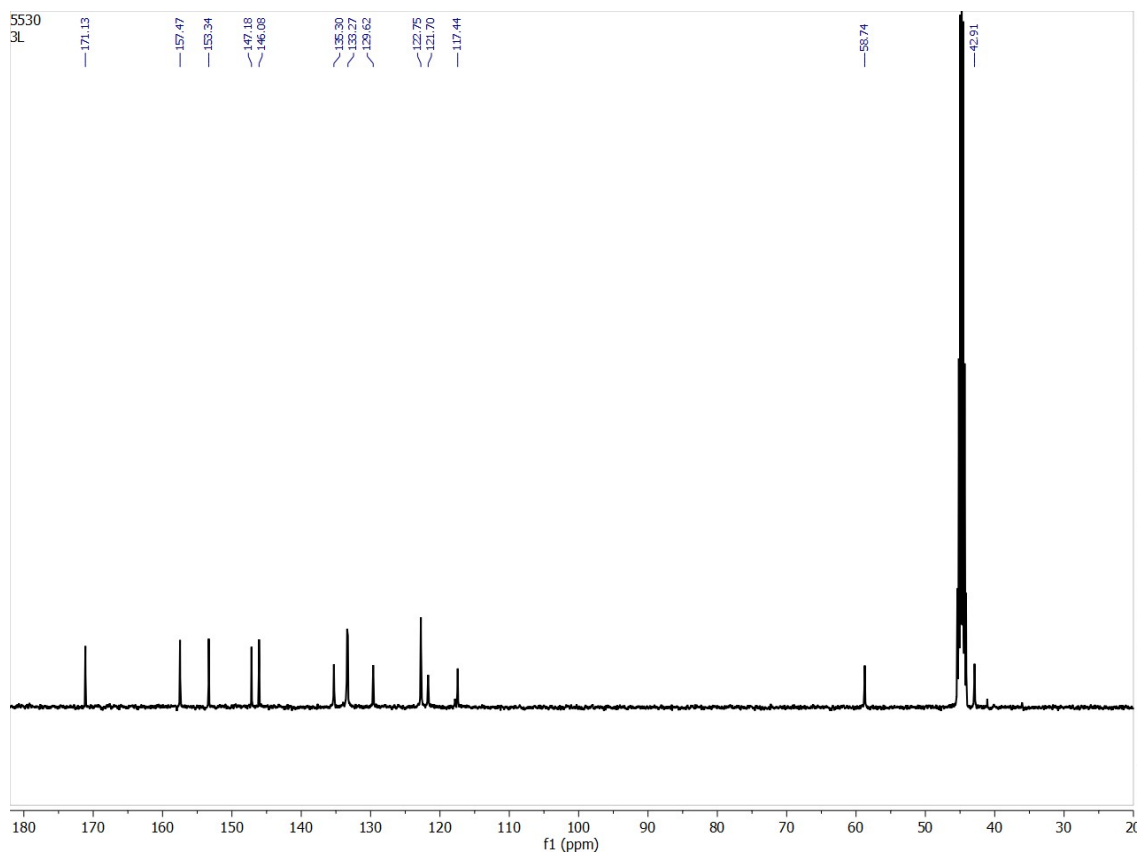

Fig. S2.  $^{13}\text{C}$ -NMR spectrum of receptor **L** in  $\text{DMSO-d}_6$  (100 MHz).

## Electronic Supplementary Information

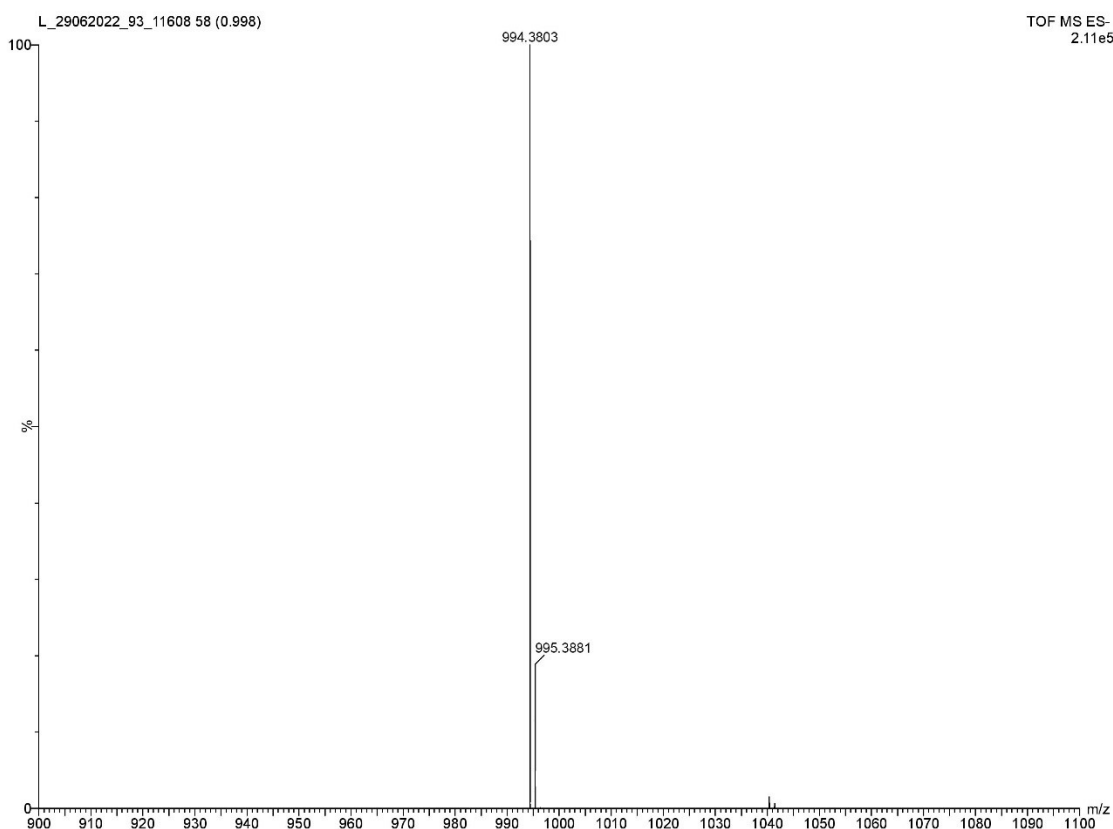

Fig. S3. HR-MS of L in acetonitrile.

### 3. Synthesis and characterization of receptor-oxoanion complexes

The receptor-oxoanion complexes were obtained by liquid-liquid extraction experiments. In a typical liquid-liquid extraction experiment, L (200 mg) was dissolved in dichloromethane (DCM, 20 mL) in the presence of three equivalents ( $n\text{-Bu}_4\text{N}^+$ )OH<sup>-</sup> and an aqueous solution of an oxoanion (one equivalent of Na<sub>2</sub>HPO<sub>4</sub>, Na<sub>2</sub>HAsO<sub>4</sub> or Na<sub>2</sub>SO<sub>4</sub>, dissolved in 20 mL of double distilled water) was added into the DCM solution. The solution mixture was then stirred at room temperature for about half an hour and the separated organic layer was washed with 10 mL of double distilled water in each case. The DCM layer was then isolated again using a separating funnel and treated with anhydrous sodium sulfate in each case. The solution was then filtered and evaporated to dryness at room temperature to obtain yellow crystalline powder of the host-guest complex which was characterized by NMR spectroscopy in DMSO-*d*<sub>6</sub> and HR-MS in acetonitrile.

Characterization of the arsenate complex [( $n\text{-Bu}_4\text{N}$ )<sub>3</sub>·(2L·AsO<sub>4</sub>)]: <sup>1</sup>H-NMR (400 MHz, DMSO-*d*<sub>6</sub>) chemical shift in δ ppm: 0.88 (t, J = 8 Hz, 36H, 12 x CH<sub>3</sub>, ( $n\text{-Bu}_4\text{N}^+$ )<sub>3</sub>), 1.25 (m, 24H, 12 x CH<sub>2</sub>, ( $n\text{-Bu}_4\text{N}^+$ )<sub>3</sub>), 1.50 (m, 24H, 12 x CH<sub>2</sub>, ( $n\text{-Bu}_4\text{N}^+$ )<sub>3</sub>), 2.50 (Residual DMSO), 2.59 (s, 12H, 6xNCH<sub>2</sub>, 2L), 3.09 (t, J = 8 Hz, 24H, 12 x N<sup>+</sup>CH<sub>2</sub>, ( $n\text{-Bu}_4\text{N}^+$ )<sub>3</sub>), 3.45 (12H, 6xCH<sub>2</sub>, 2L), 6.73–7.76 (48H, Aromatic-CH, 2L), 8.20 (s, 6H, Amide-NH, 2L), 11.84 (s, 6H, Urea-NH<sub>α</sub>, 2L), 12.90 (s, 6H, Urea-NH<sub>β</sub>, 2L) (See Fig. S4 below).

<sup>13</sup>C-NMR (100 MHz, DMSO-*d*<sub>6</sub>) chemical shift in δ ppm: 13.8 (12C, 12 x CH<sub>3</sub>, ( $n\text{-Bu}_4\text{N}^+$ )<sub>3</sub>), 19.6 (12C, 12 x CH<sub>2</sub>, ( $n\text{-Bu}_4\text{N}^+$ )<sub>3</sub>), 23.4 (12C, 12 x CH<sub>2</sub>, ( $n\text{-Bu}_4\text{N}^+$ )<sub>3</sub>), 36.6 (6C, 6 x NCH<sub>2</sub>, 2L), 52.8 (6C, 6 x CH<sub>2</sub>, 2L), 57.9 (12C, 12 x CH<sub>2</sub>, ( $n\text{-Bu}_4\text{N}^+$ )<sub>3</sub>), 111.1 (6C, 6xCH, 2L), 115.3 (6C, 6xCH, 2L), 118.0 (6C, 6xCH, 2L), 124.0 (6C, 6xCH, 2L), 128.0 (6C, 6xCH, 2L), 128.4 (6C, 6xCH, 2L), 142.1 (6C, 6xCH, 2L), 143.4 (6C, 6xCH, 2L), 147.8 (6C, 6xCH, 2L), 153.3 (6C, 6x Amide-CO, 2L), 167.3 (6C, 6x Urea-CO, 2L) (See Fig. S5 below).

## Electronic Supplementary Information

HR-MS of the arsenate complex (negative ion):  $m/z$  1136.152 [ $L \cdot H_2AsO_4$ ] $^-$ , 1065.689 [ $2L \cdot HAsO_4$ ] $^{2-}$ , 994.238 [ $L-H^+$ ] $^-$ , 567.594 [ $L \cdot HAsO_4$ ] $^{2-}$ , 140.934 [ $H_2AsO_4$ ] $^-$  (See Fig. S6 below).

Characterization of the phosphate complex [ $(n-Bu_4N)_3 \cdot (2L \cdot PO_4)$ ]:  $^1H$ -NMR (400 MHz, DMSO- $d_6$ ) chemical shift in  $\delta$  ppm: 0.87 (t,  $J = 8$  Hz, 36H, 12 x  $CH_3$ , ( $n-Bu_4N^+$ ) $_3$ ), 1.23 (m, 24H, 12 x  $CH_2$ , ( $n-Bu_4N^+$ ) $_3$ ), 1.49 (m, 24H, 12 x  $CH_2$ , ( $n-Bu_4N^+$ ) $_3$ ), 2.50 (Residual DMSO), 2.58 (s, 12H, 6xNCH $_2$ ), 3.06 (t,  $J = 8$  Hz, 24H, 12 x N $^+CH_2$ , ( $n-Bu_4N^+$ ) $_3$ ), 6.71–7.75 (48H, Aromatic- $CH$ , 2L), 8.15 (s, 6H, Amide- $NH$ , 2L), 11.87 (s, 6H, Urea- $NH_w$ , 2L), 12.98 (s, 6H, Urea- $NH_p$ , 2L) (See Fig. S7 below).

$^{31}P$ -NMR (400 MHz, DMSO- $d_6$ ): 8.12 ppm (See Fig. S8 below).

$^{13}C$ -NMR (100 MHz, DMSO- $d_6$ ) chemical shift in  $\delta$  ppm: 13.9 (12C, 12 x  $CH_3$ , ( $n-Bu_4N^+$ ) $_3$ ), 19.6 (12C, 12 x  $CH_2$ , ( $n-Bu_4N^+$ ) $_3$ ), 23.5 (12C, 12 x  $CH_2$ , ( $n-Bu_4N^+$ ) $_3$ ), 36.5 (6C, 6 x NCH $_2$ , 2L), 52.8 (6C, 6 x CH $_2$ , 2L), 57.9 (12C, 12 x  $CH_2$ , ( $n-Bu_4N^+$ ) $_3$ ), 111.2 (6C, 6xCH, 2L), 115.5 (6C, 6xCH, 2L), 118.2 (6C, 6xCH, 2L), 124.3 (6C, 6xCH, 2L), 128.1 (6C, 6xCH, 2L), 128.4 (6C, 6xCH, 2L), 142.1 (6C, 6xCH, 2L), 143.4 (6C, 6xCH, 2L), 147.9 (6C, 6xCH, 2L), 153.5 (6C, 6x Amide-CO, 2L), 167.5 (6C, 6x Urea-CO, 2L) (See Fig. S9 below).

HR-MS of the phosphate complex (negative ion):  $m/z$  1092.426 [ $L \cdot H_2PO_4$ ] $^-$ , 1043.925 [ $2L \cdot HPO_4$ ] $^{2-}$ , 994.444 [ $L-H^+$ ] $^-$ , 545.762 ( $L \cdot HPO_4$ ) $^{2-}$  (See Fig. S10 below).

Characterization of the sulfate complex [ $(n-Bu_4N)_2 \cdot (2L \cdot SO_4)$ ]:  $^1H$ -NMR (400 MHz, DMSO- $d_6$ ) chemical shift in  $\delta$  ppm: 0.90 (t,  $J = 8$  Hz, 24H, 8 x  $CH_3$ , ( $n-Bu_4N^+$ ) $_2$ ), 1.27 (m, 16H, 8 x  $CH_2$ , 2( $n-Bu_4N^+$ )), 1.53 (m, 16H, 8 x  $CH_2$ , 2( $n-Bu_4N^+$ )), 2.51 (Residual DMSO), 2.65 (t,  $J = 4$  Hz, 12H, 6xNCH $_2$ ), 3.13 (t,  $J = 12$  Hz, 16H, 8 x N $^+CH_2$ , 2( $n-Bu_4N^+$ )), 3.43 (12H, 6xNCH $_2CH_2$ ), 7.38–7.77 (48H, Aromatic- $CH$ , 2L), 8.49 (s, 6H, Amide- $NH$ , 2L), 10.04 (s, 6H, Urea- $NH_w$ , 2L), 10.53 (s, 6H, Urea- $NH_p$ , 2L) (See Fig. S11 below).

$^{13}C$ -NMR (100 MHz, DMSO- $d_6$ ) chemical shift in  $\delta$  ppm: 13.9 (8C, 8 x  $CH_3$ , ( $n-Bu_4N^+$ ) $_2$ ), 19.7 (8C, 8 x  $CH_2$ , ( $n-Bu_4N^+$ ) $_2$ ), 23.5 (8C, 8 x  $CH_2$ , ( $n-Bu_4N^+$ ) $_2$ ), 36.9 (6C, 6 x NCH $_2$ , 2L), 52.2 (6C, 6 x CH $_2$ , 2L), 58.0 (8C, 8 x  $CH_2$ , ( $n-Bu_4N^+$ ) $_2$ ), 112.3 (6C, 6xCH, 2L), 116.2 (6C, 6xCH, 2L), 118.1 (6C, 6xCH, 2L), 124.6 (6C, 6xCH, 2L), 127.3 (6C, 6xCH, 2L), 128.0 (6C, 6xCH, 2L), 130.0 (6C, 6xCH, 2L), 142.0 (6C, 6xCH, 2L), 143.0 (6C, 6xCH, 2L), 148.40 (6C, 6xCH, 2L), 152.9 (6C, 6x amide-CO, 2L), 166.4 (6C, 6x urea-CO, 2L) (See Fig. S12 below).

HR-MS of the sulfate complex (negative ion):  $m/z$  1333.692 [ $n-Bu_4(L \cdot SO_4)$ ] $^-$ , 994.444 [ $L-H^+$ ] $^-$ , 545.762 [ $L \cdot SO_4$ ] $^{2-}$ , 97.023 [ $HSO_4$ ] $^-$  (See Fig. S13 below).

## Electronic Supplementary Information

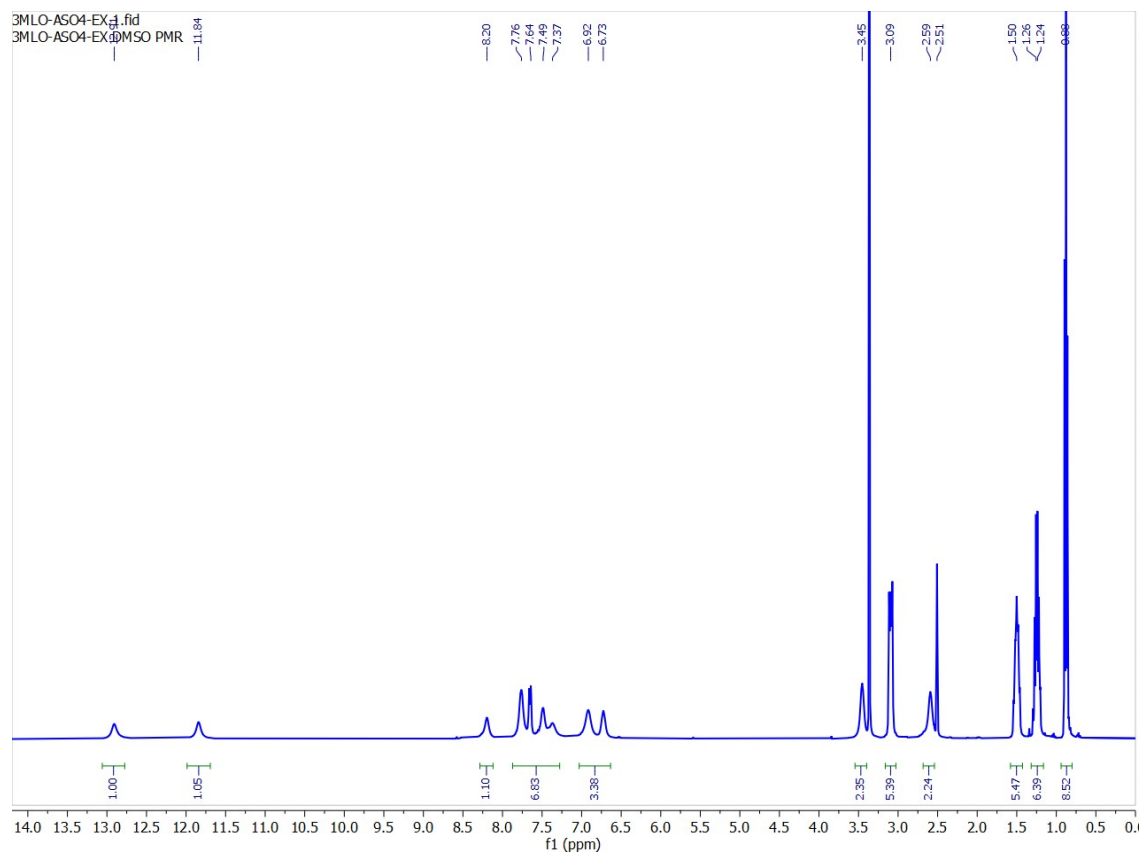

Fig. S4.  $^1\text{H}$ -NMR spectrum of the arsenate complex  $[(n\text{-Bu}_4\text{N})_3 \cdot (2\text{L} \cdot \text{AsO}_4)]$  crystals in  $\text{DMSO-d}_6$ .

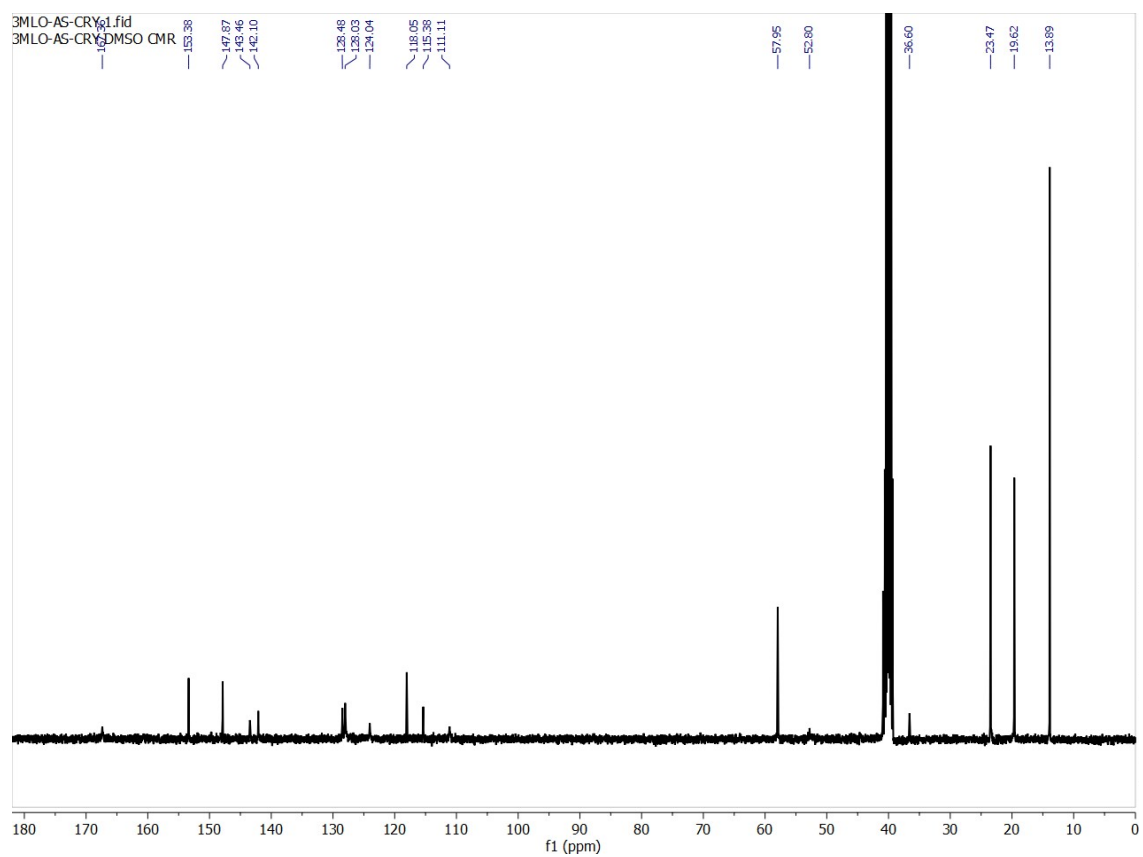

Fig. S5.  $^{13}\text{C}$ -NMR spectrum of the arsenate complex  $[(n\text{-Bu}_4\text{N})_3 \cdot (2\text{L} \cdot \text{AsO}_4)]$  crystals in  $\text{DMSO-d}_6$ .

## Electronic Supplementary Information

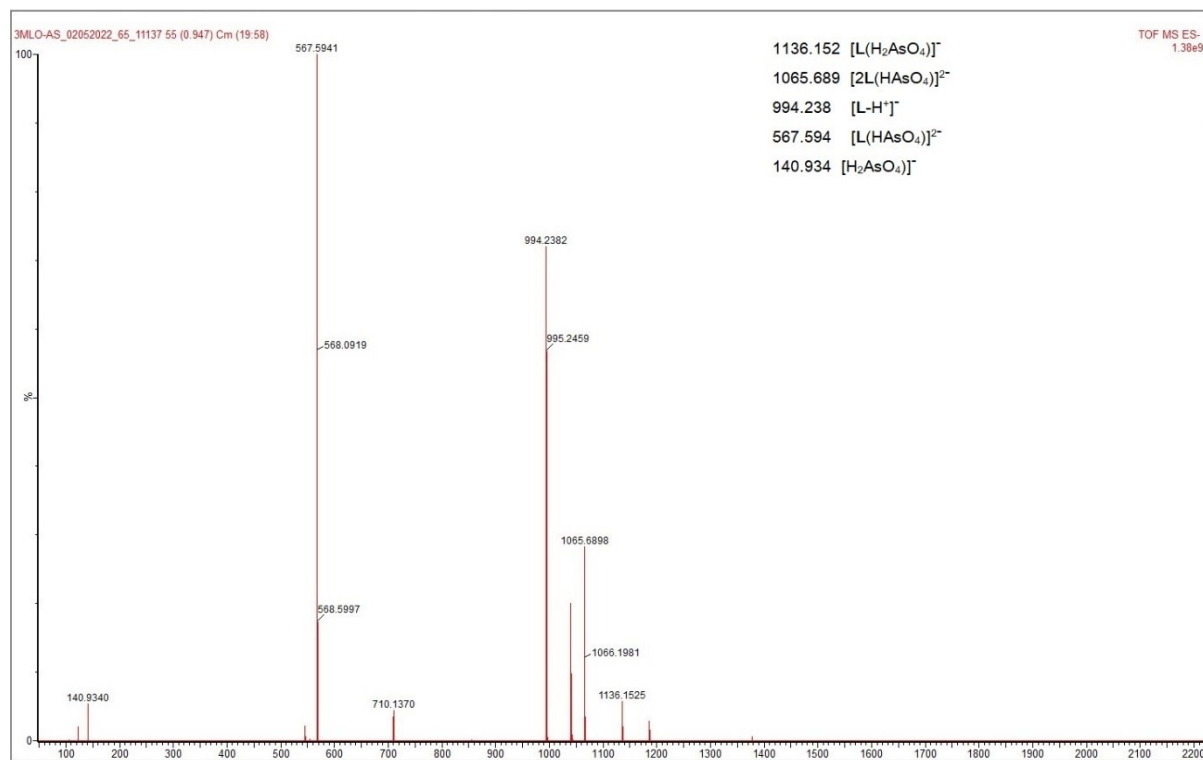

Fig. S6. HR-MS of the arsenate complex [(n-Bu<sub>4</sub>N)<sub>3</sub>·(2L·AsO<sub>4</sub>)] crystals in acetonitrile in negative mode. Peak patterns with a 0.5 mass difference indicate doubly-charged species.

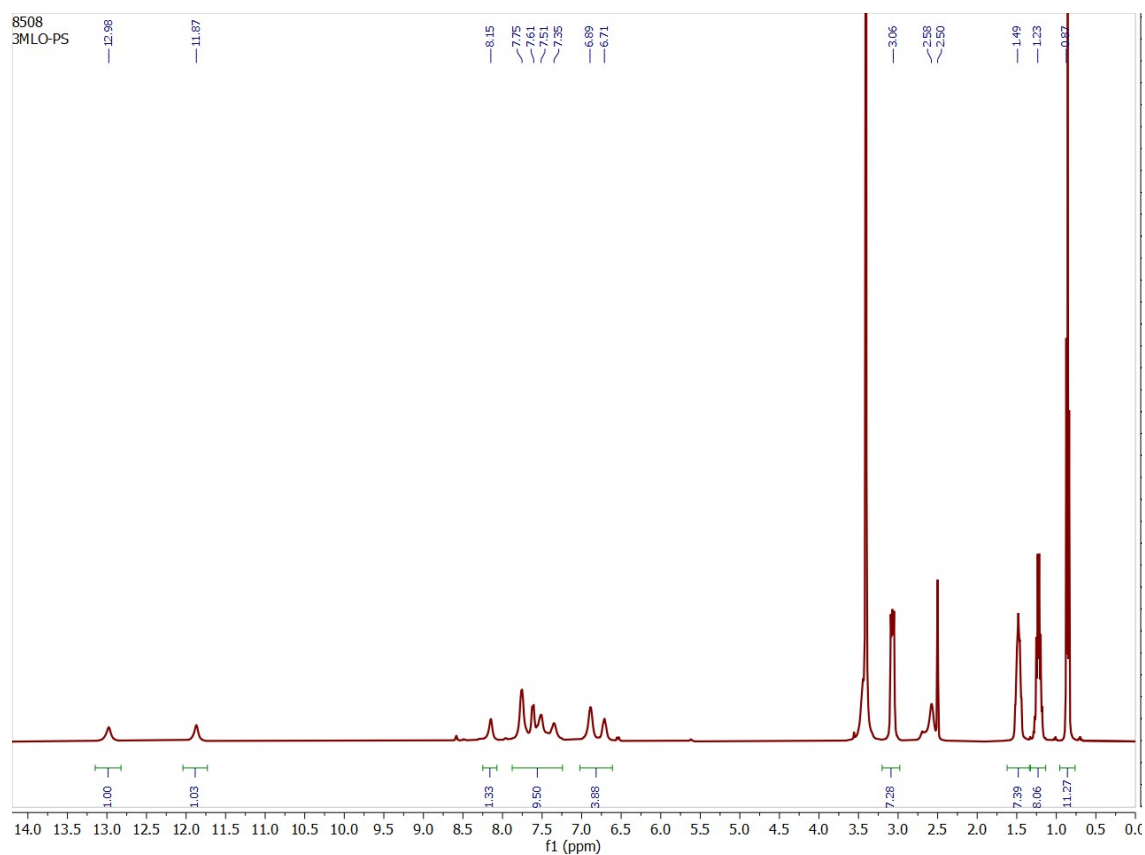

Fig. S7. <sup>1</sup>H-NMR spectrum of the phosphate complex [(n-Bu<sub>4</sub>N)<sub>3</sub>·(2L·PO<sub>4</sub>)] crystals in DMSO-d<sub>6</sub>.

## Electronic Supplementary Information

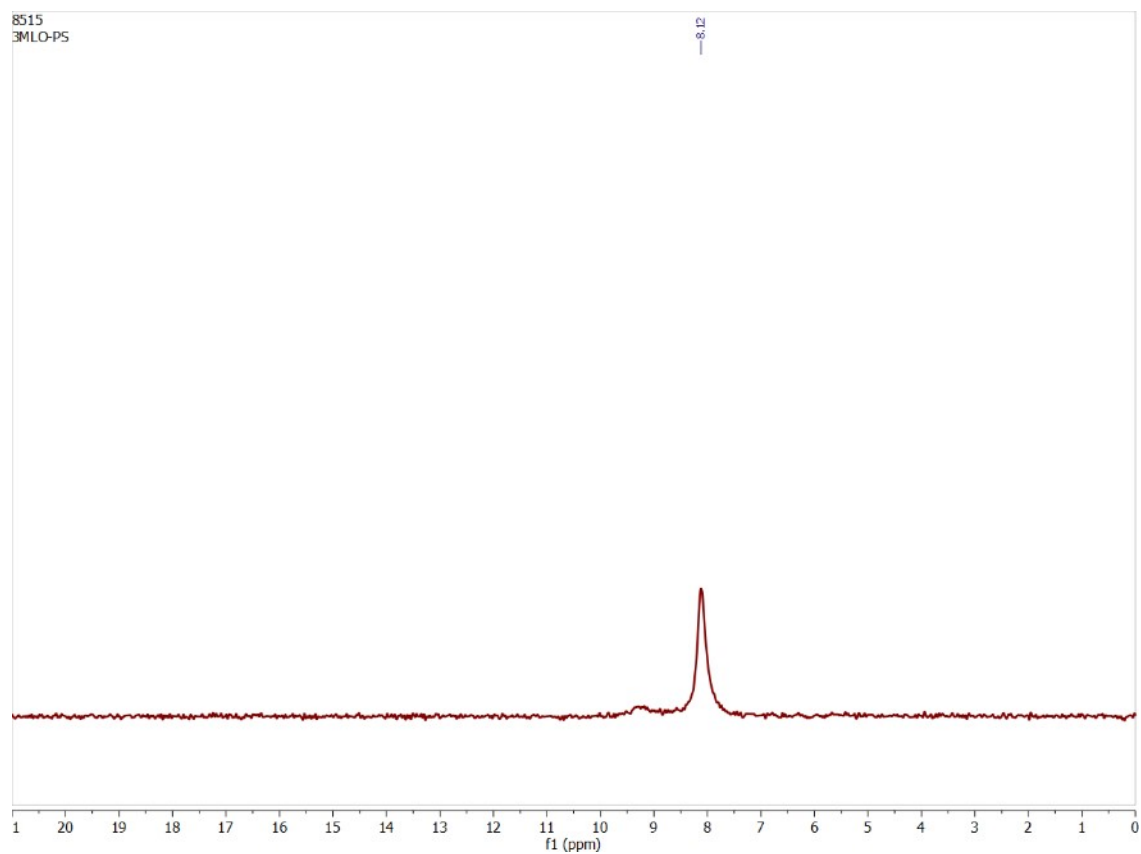

Fig. S8. <sup>31</sup>P-NMR spectrum of the phosphate complex [(n-Bu<sub>4</sub>N)<sub>3</sub>·(2L·PO<sub>4</sub>)] crystals in DMSO-d<sub>6</sub>.

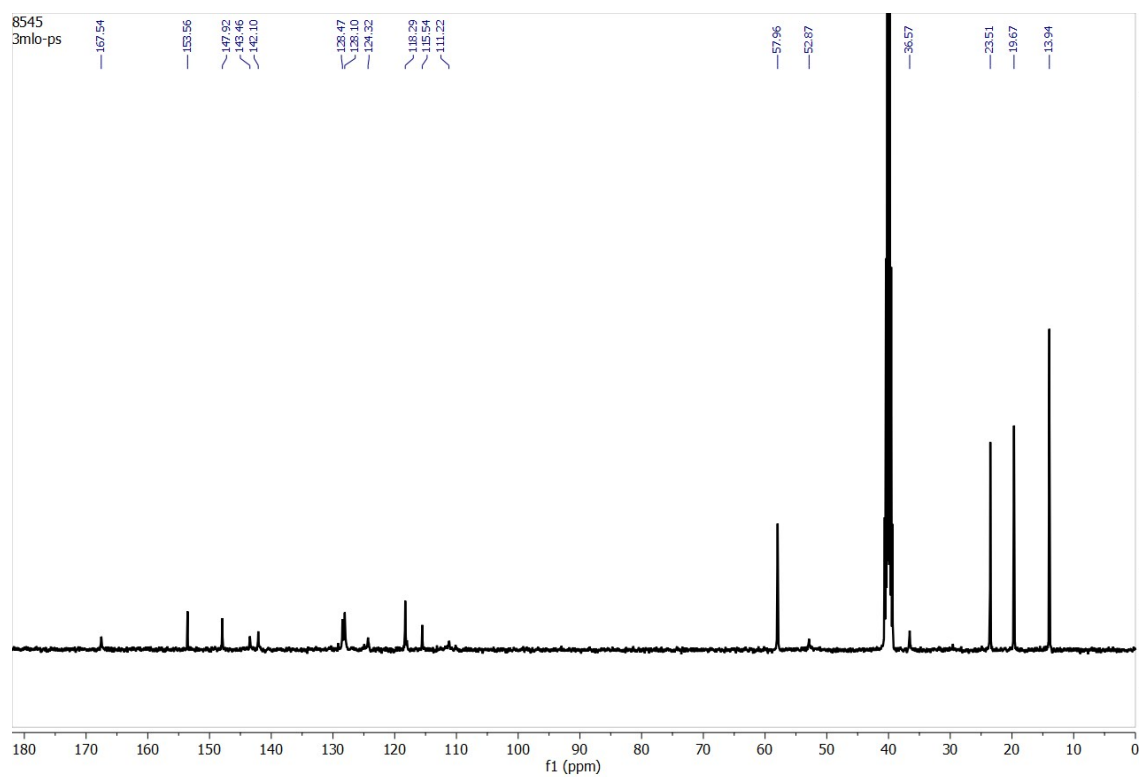

Fig. S9. <sup>13</sup>C-NMR spectrum of the phosphate complex [(n-Bu<sub>4</sub>N)<sub>3</sub>·(2L·PO<sub>4</sub>)] crystals in DMSO-d<sub>6</sub>.



## Electronic Supplementary Information

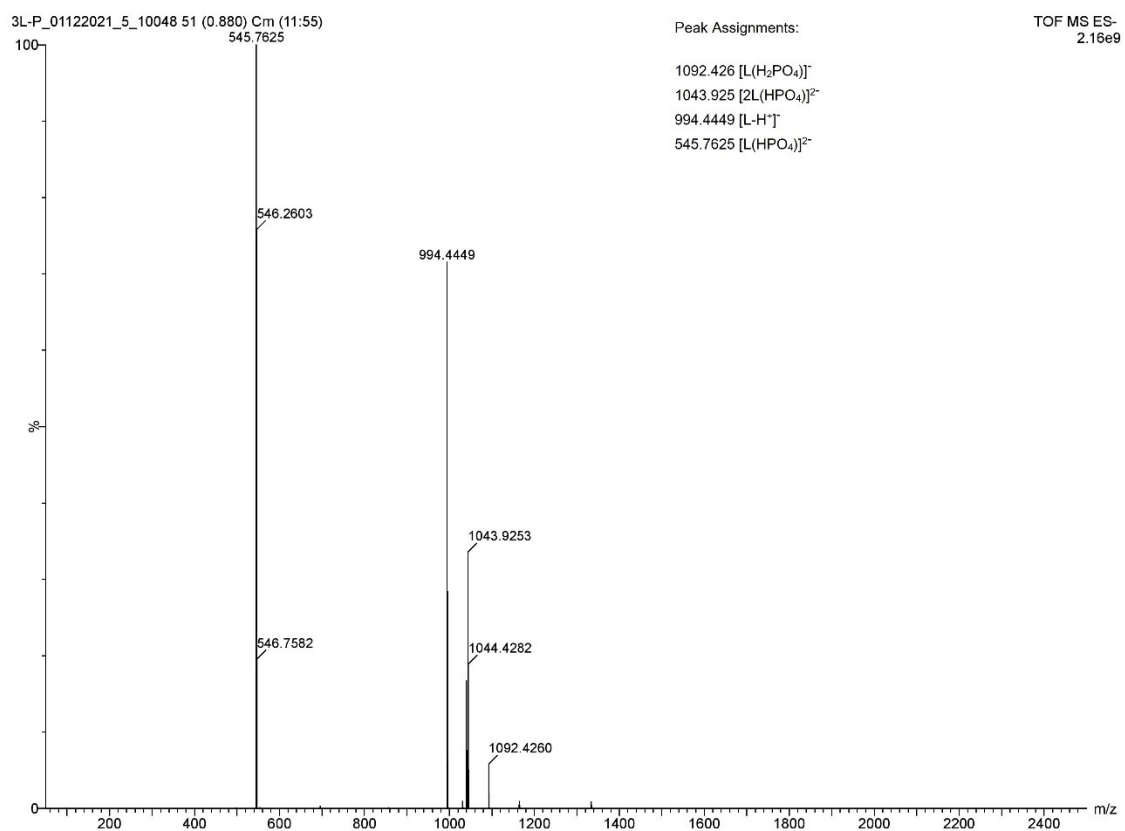

Fig. S10. HR-MS of the phosphate complex [(n-Bu<sub>4</sub>N)<sub>3</sub>·(2L·PO<sub>4</sub>)] crystals in acetonitrile in negative mode. Peak patterns with a 0.5 mass difference indicate doubly-charged species.

## Electronic Supplementary Information

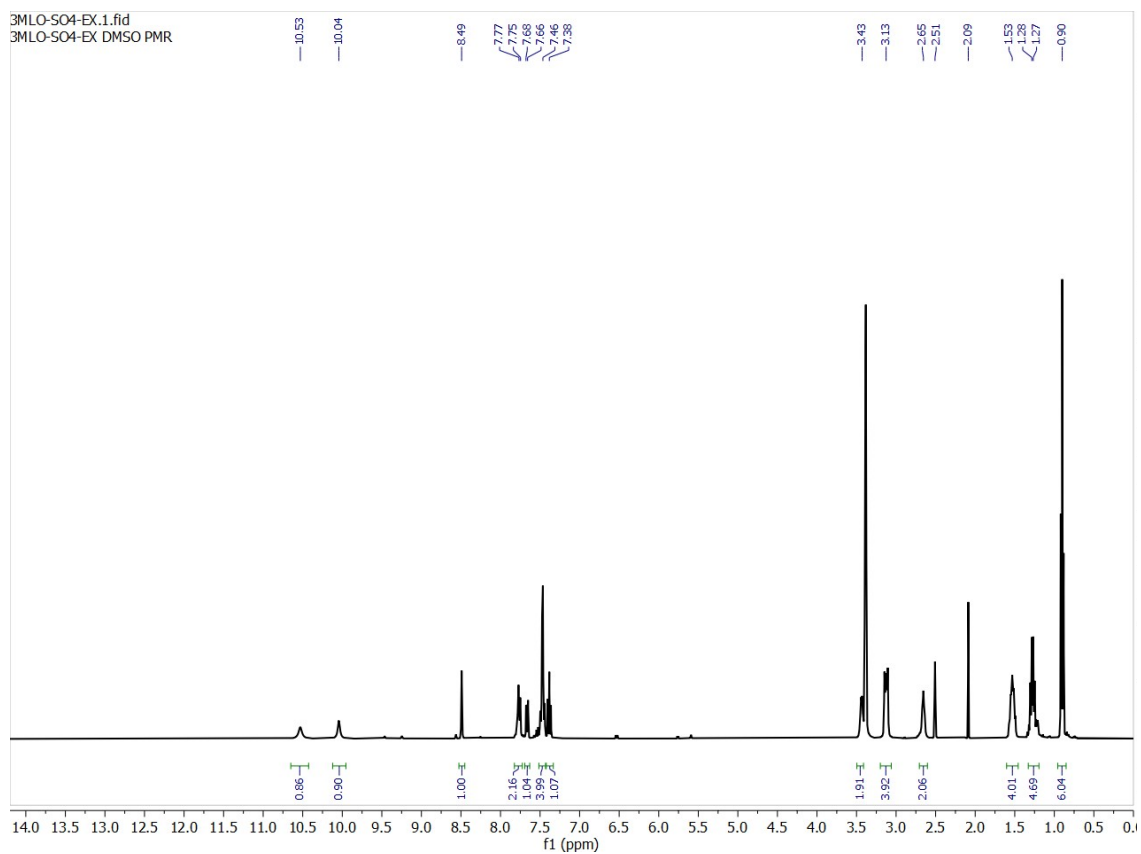

Fig. S11.  $^1\text{H}$ -NMR spectrum of the sulfate complex  $[(n\text{-Bu}_4\text{N})_2 \cdot (2\text{L} \cdot \text{SO}_4)]$  crystals in  $\text{DMSO-d}_6$ .

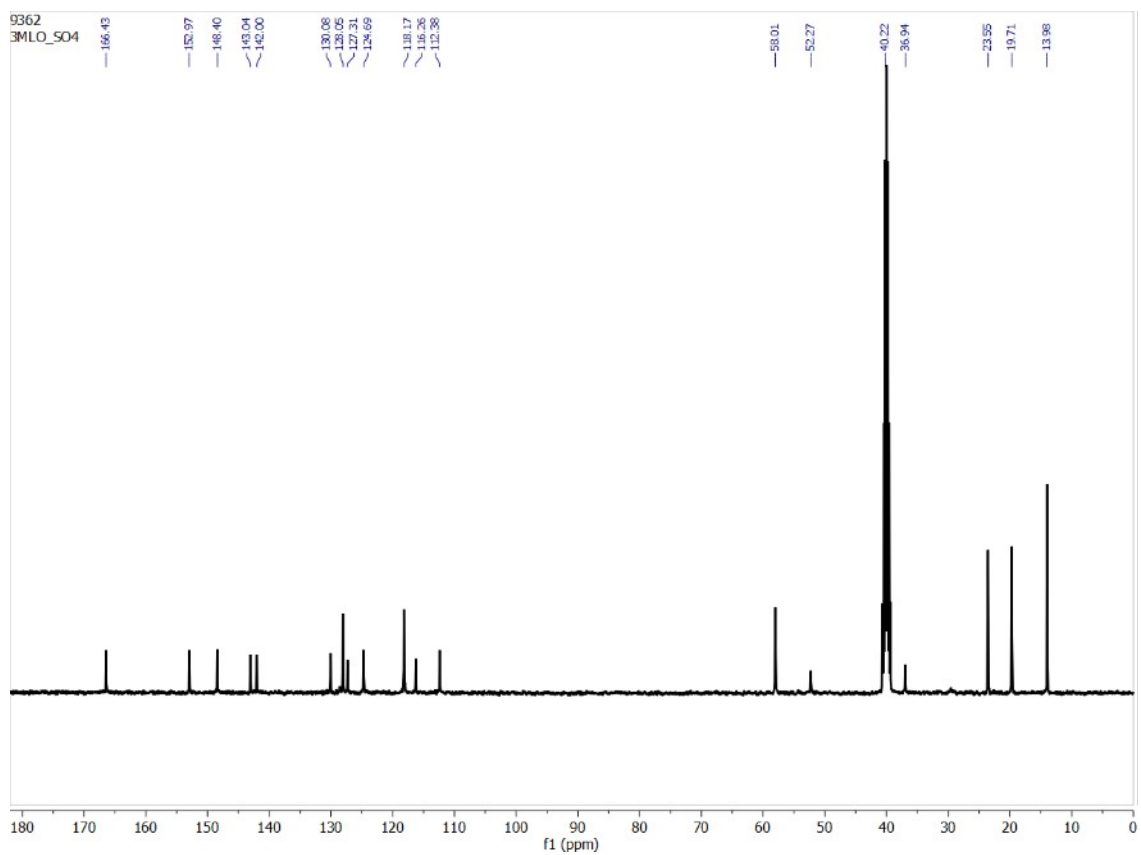

Fig. S12.  $^{13}\text{C}$ -NMR spectrum of the sulfate complex  $[(n\text{-Bu}_4\text{N})_2 \cdot (2\text{L} \cdot \text{SO}_4)]$  crystals in  $\text{DMSO-d}_6$ .

## Electronic Supplementary Information

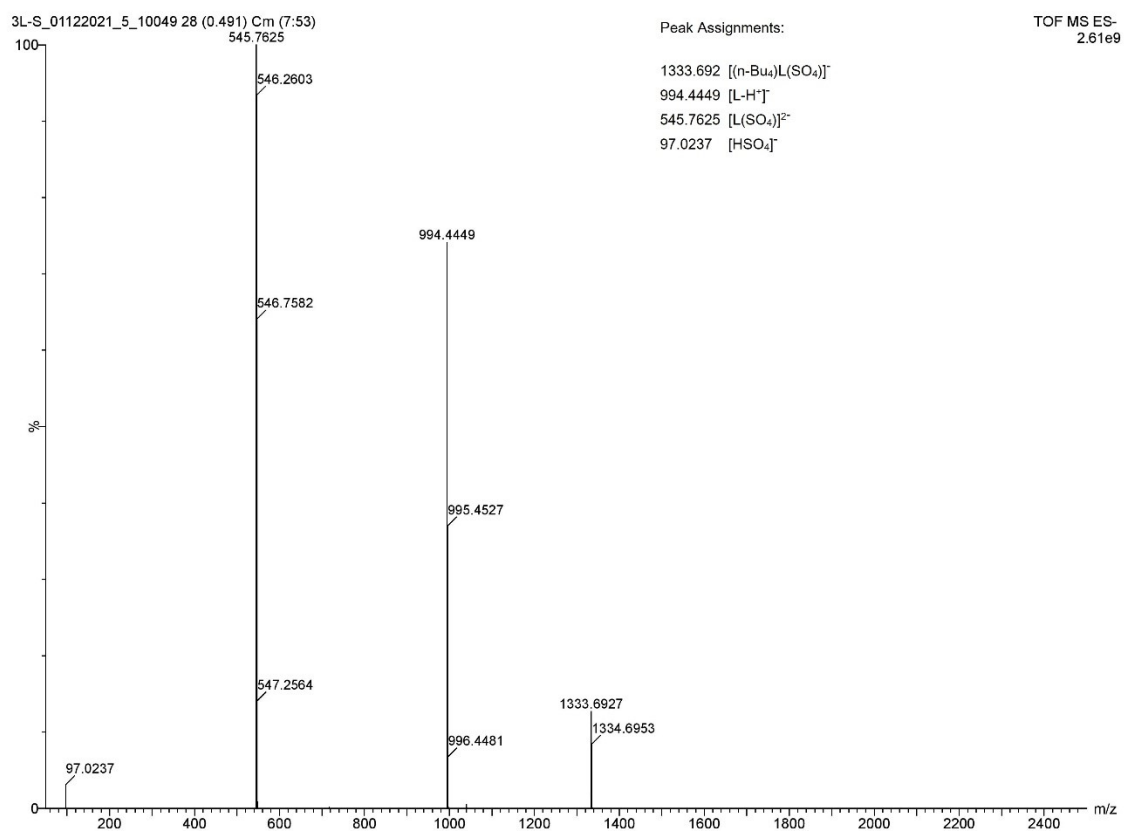

Fig. S13. HR-MS of the sulfate complex [(n-Bu<sub>4</sub>N)<sub>2</sub>·(2L·SO<sub>4</sub>)] crystals in acetonitrile in negative mode. Peak patterns with a 0.5 mass difference indicate doubly-charged species.

## Electronic Supplementary Information

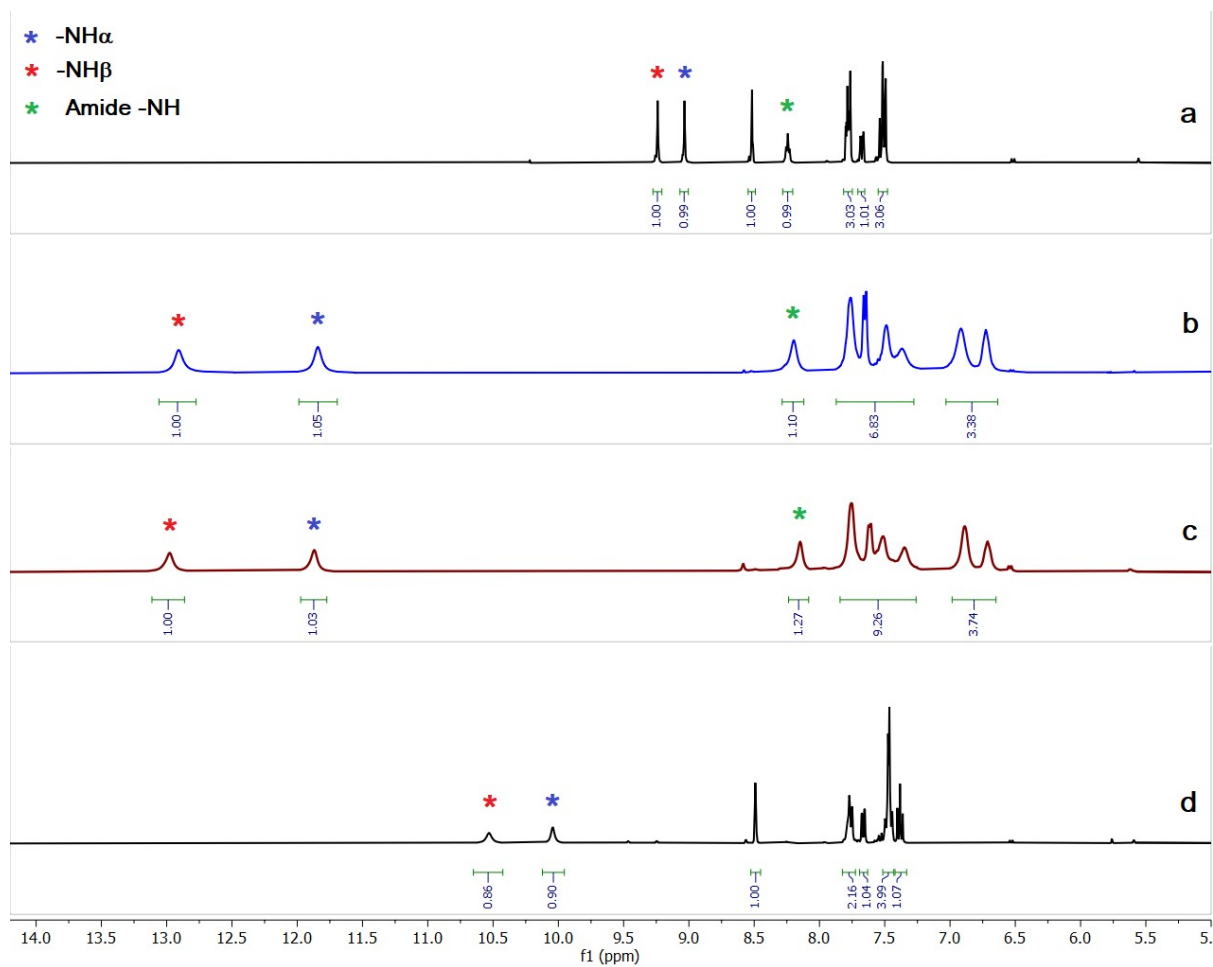

Fig. S14. Aromatic region of the <sup>1</sup>H-NMR spectra of (a) receptor **L**, (b) crystals of the arsenate complex [(n-Bu<sub>4</sub>N)<sub>3</sub>(2L·AsO<sub>4</sub>)], (c) crystals of the phosphate complex [(n-Bu<sub>4</sub>N)<sub>3</sub>(2L·PO<sub>4</sub>)] and (d) crystals of the sulfate complex [(n-Bu<sub>4</sub>N)<sub>2</sub>(2L·SO<sub>4</sub>)].

### 4. <sup>1</sup>H-NMR spectra of **L** in the presence of quaternary ammonium (n-Bu<sub>4</sub>N)<sup>+</sup>/(Et<sub>4</sub>N)<sup>+</sup> salts.

## Electronic Supplementary Information

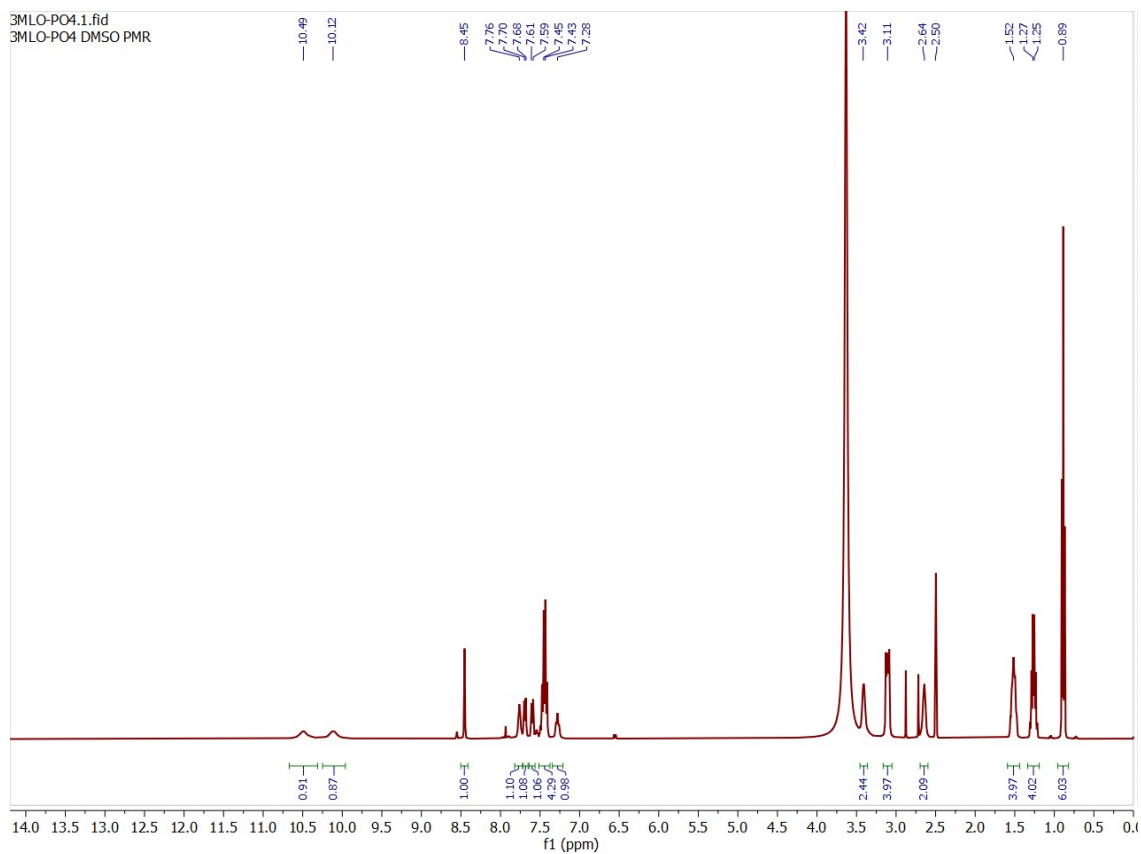

Fig. S15.  $^1\text{H-NMR}$  spectrum of **L** in the presence of 1.5 equiv.  $(\text{n-Bu}_4\text{N})^+\text{H}_2\text{PO}_4^-$  in  $\text{DMSO-d}_6$ .

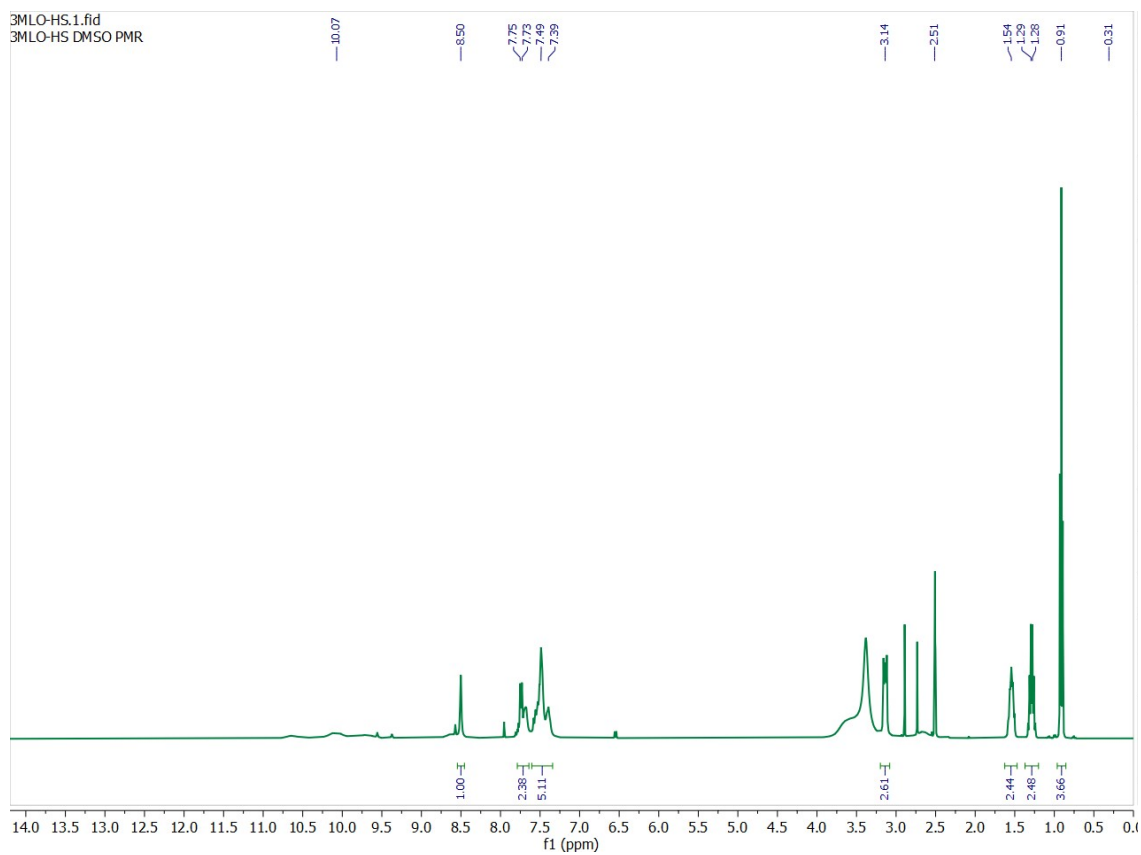

Fig. S16.  $^1\text{H-NMR}$  spectrum of **L** in the presence of 1.0 equiv.  $(\text{n-Bu}_4\text{N})^+\text{HSO}_4^-$  in  $\text{DMSO-d}_6$ .

## Electronic Supplementary Information

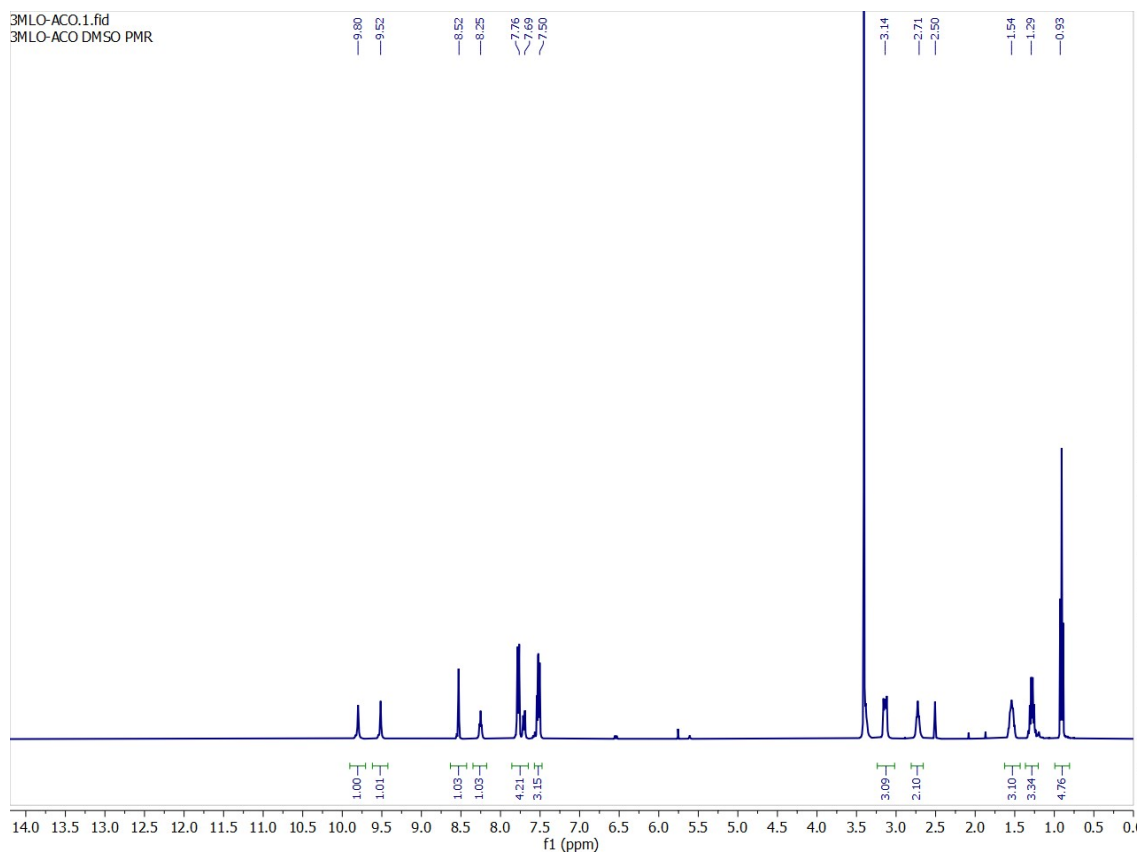

Fig. S17.  $^1\text{H-NMR}$  spectrum of **L** in the presence of 1.0 equiv.  $(\text{n-Bu}_4\text{N})^+\text{CH}_3\text{CO}_2^-$  in  $\text{DMSO-d}_6$ .

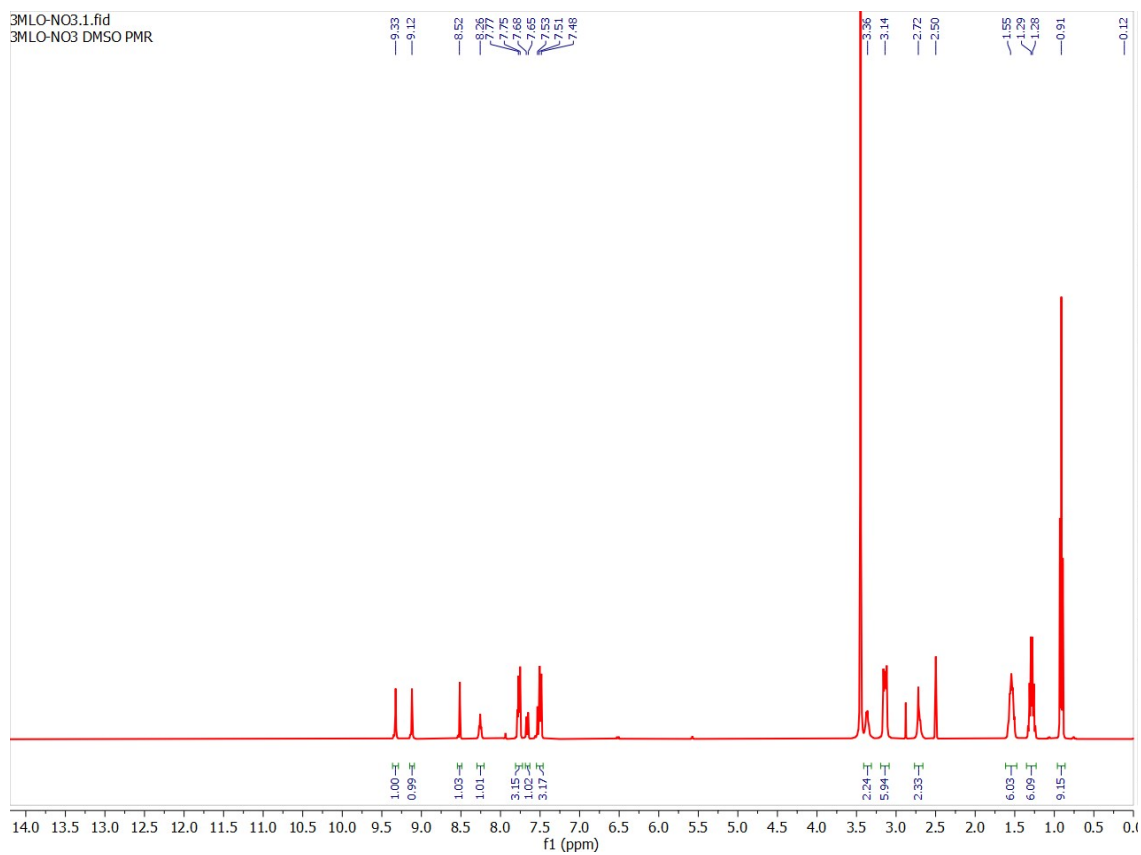

Fig. S18.  $^1\text{H-NMR}$  spectrum of **L** in the presence of 2.0 equiv.  $(\text{n-Bu}_4\text{N})^+\text{NO}_3^-$  in  $\text{DMSO-d}_6$ .

## Electronic Supplementary Information

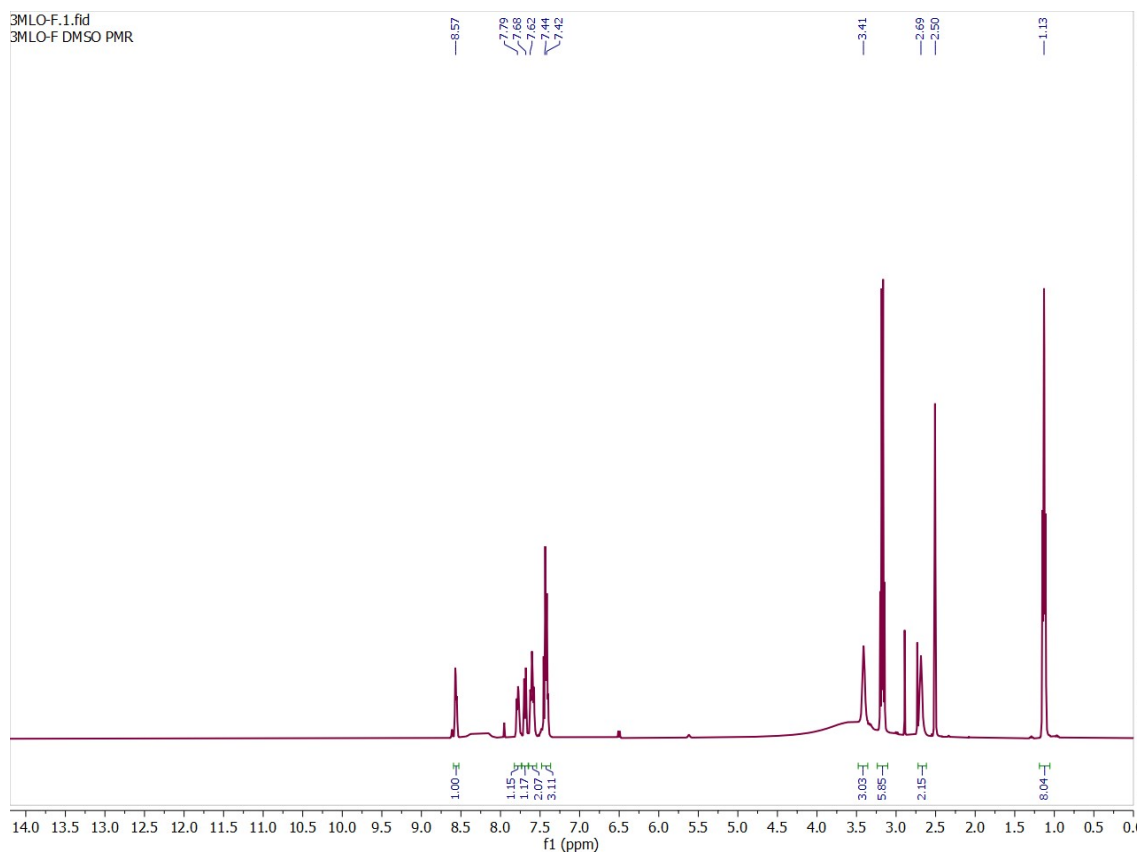

Fig. S19.  $^1\text{H-NMR}$  spectrum of **L** in the presence of 2.0 equiv.  $(\text{Et}_4\text{N})^+\text{F}^-$  in  $\text{DMSO-d}_6$ .

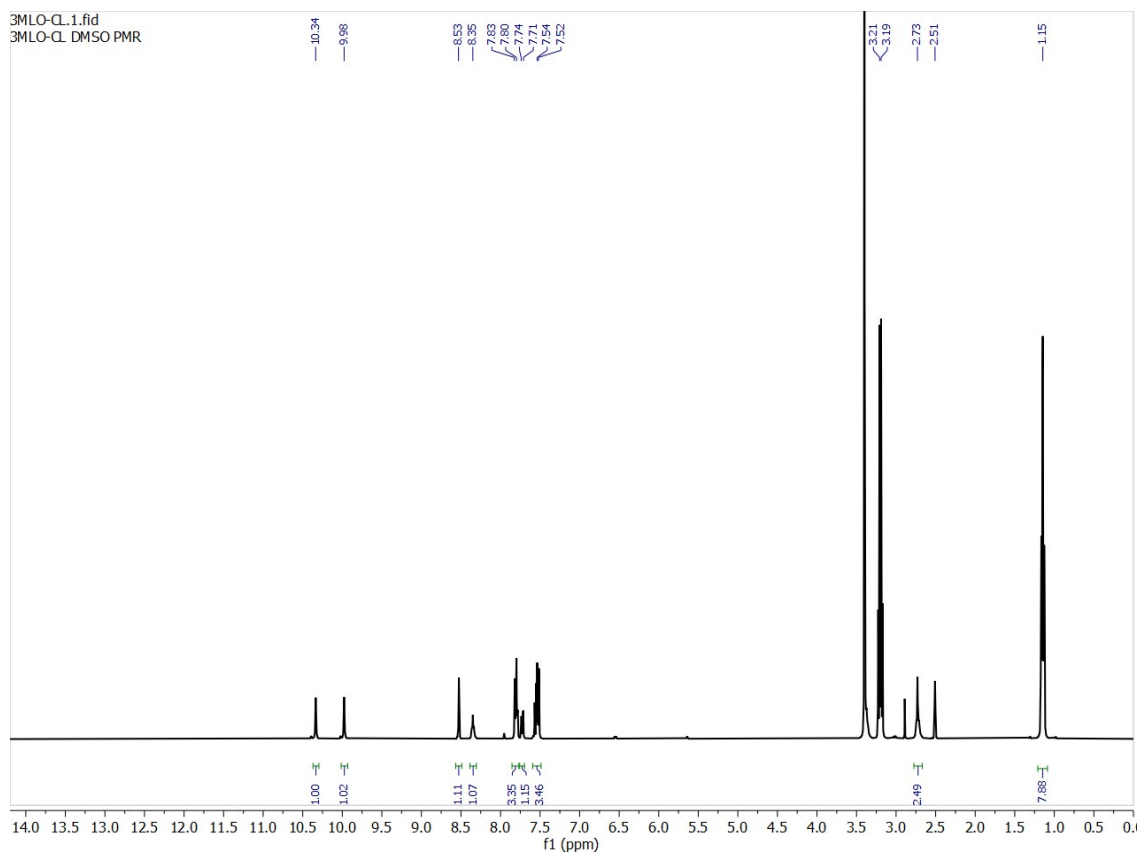

Fig. S20.  $^1\text{H-NMR}$  spectrum of **L** in the presence of 2.0 equiv.  $(\text{Et}_4\text{N})^+\text{Cl}^-$  in  $\text{DMSO-d}_6$ .

## Electronic Supplementary Information

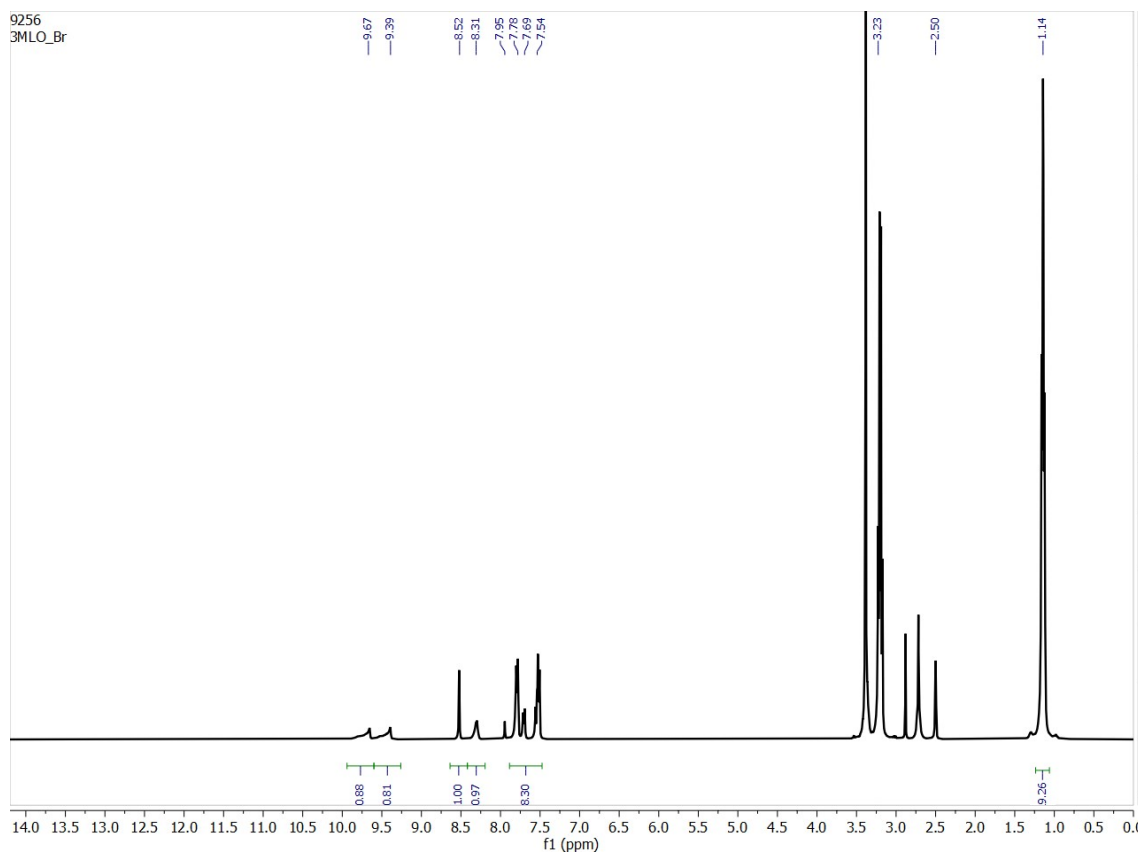

Fig. S21.  $^1\text{H-NMR}$  spectrum of **L** in the presence of 2.0 equiv.  $(\text{Et}_4\text{N})^+\text{Br}^-$  in  $\text{DMSO-d}_6$ .

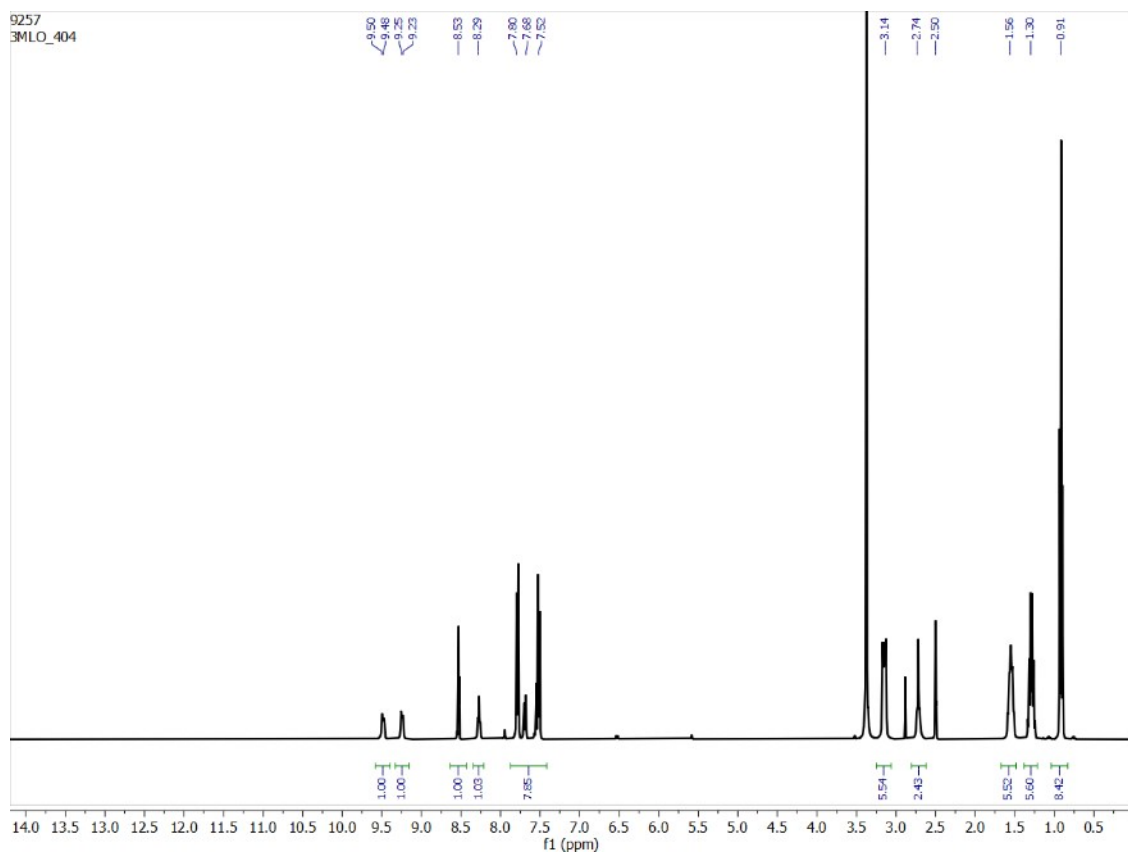

Fig. S22.  $^1\text{H-NMR}$  spectrum of **L** in the presence of 2.0 equiv.  $(n\text{-Bu}_4\text{N})^+\text{ClO}_4^-$  in  $\text{DMSO-d}_6$ .



## Electronic Supplementary Information

### 5. $^1\text{H-NMR}$ spectra of oxoanion complexes obtained from liquid-liquid extraction experiments

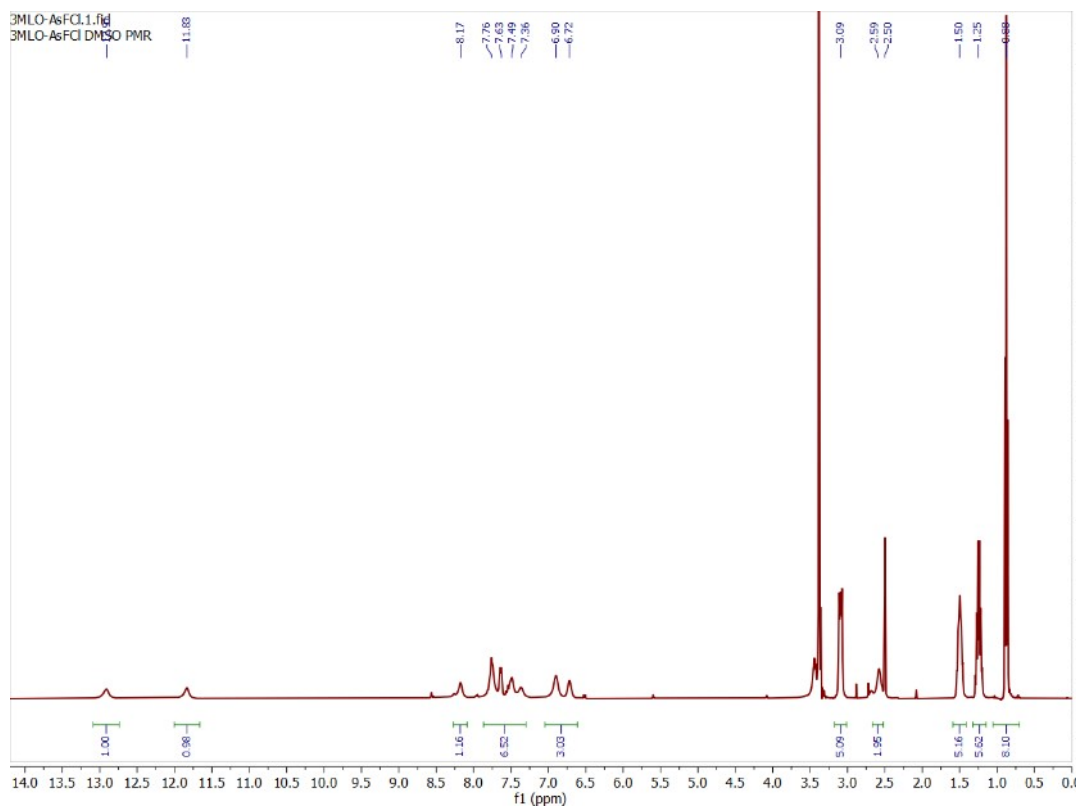

Fig. S23.  $^1\text{H-NMR}$  spectrum of the arsenate complex ( $\text{DMSO-d}_6$ ) extracted in the presence of  $\text{NaF}$  and  $\text{NaCl}$ .

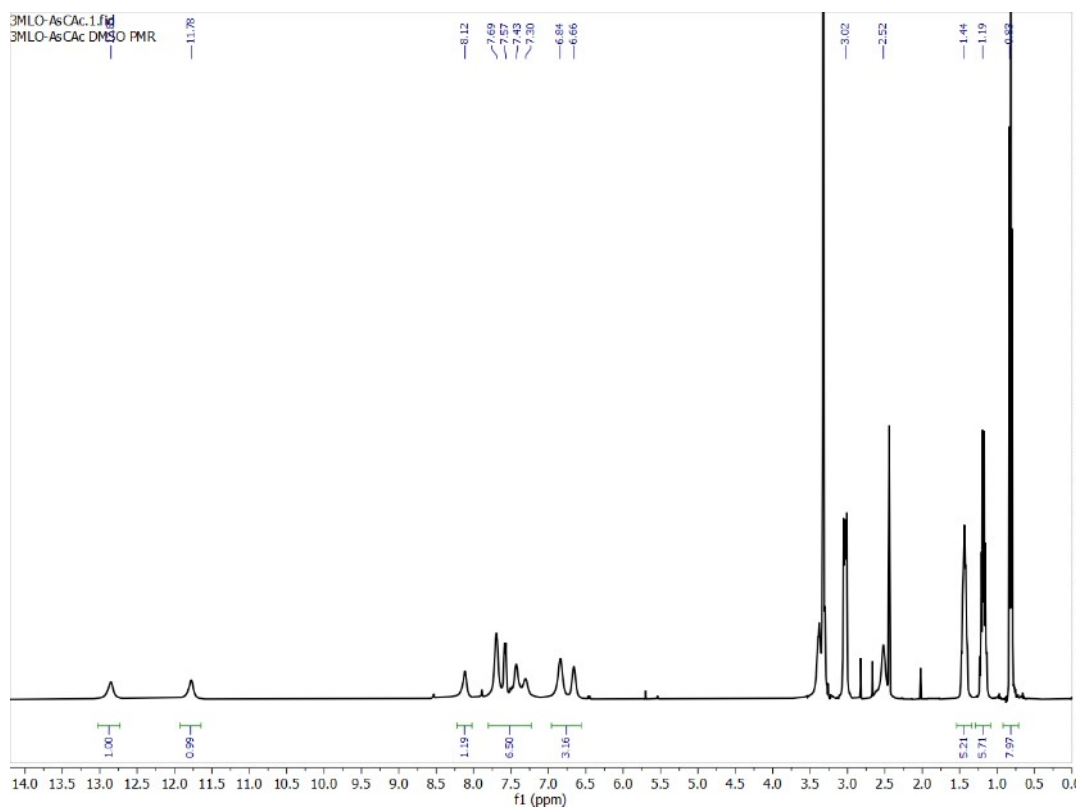

Fig. S24.  $^1\text{H-NMR}$  spectrum of the arsenate complex extracted in the presence of  $\text{Na}_2\text{CO}_3$  and  $\text{NaCH}_3\text{CO}_2$ .

## Electronic Supplementary Information

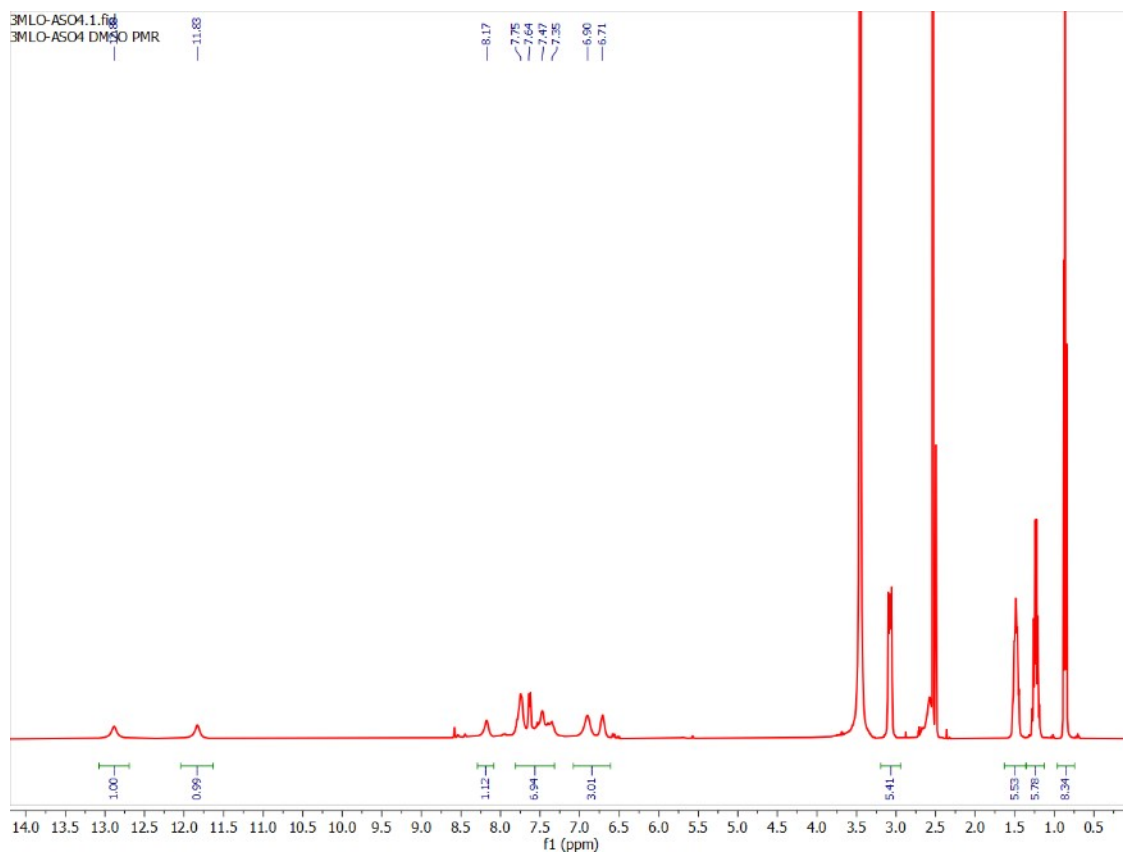

Fig. S25.  $^1\text{H-NMR}$  spectrum of the arsenate complex ( $\text{DMSO-d}_6$ ) extracted in the presence of  $\text{Na}_2\text{SO}_4$  and  $\text{NaNO}_3$ .

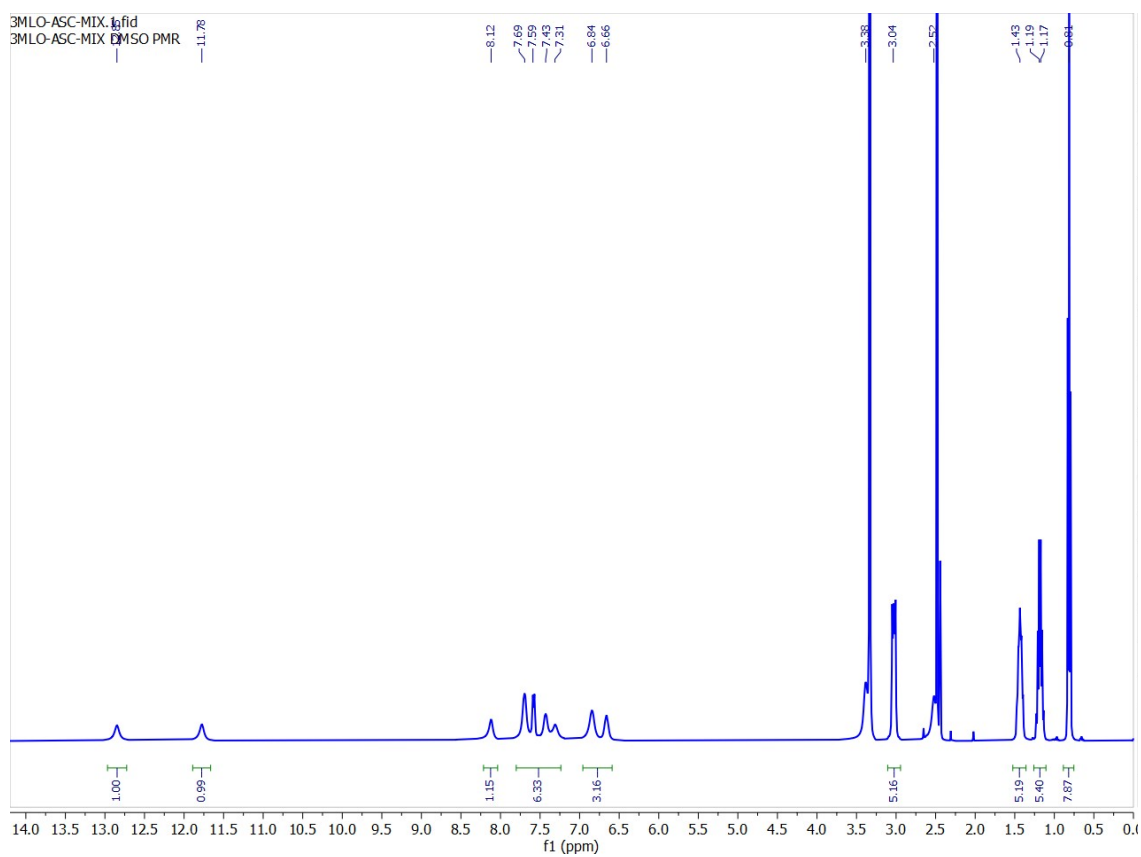

Fig. S26.  $^1\text{H-NMR}$  spectrum of recrystallized arsenate complex ( $\text{DMSO-d}_6$ ) extracted in the presence of  $\text{Na}_2\text{HPO}_4$ .

## Electronic Supplementary Information

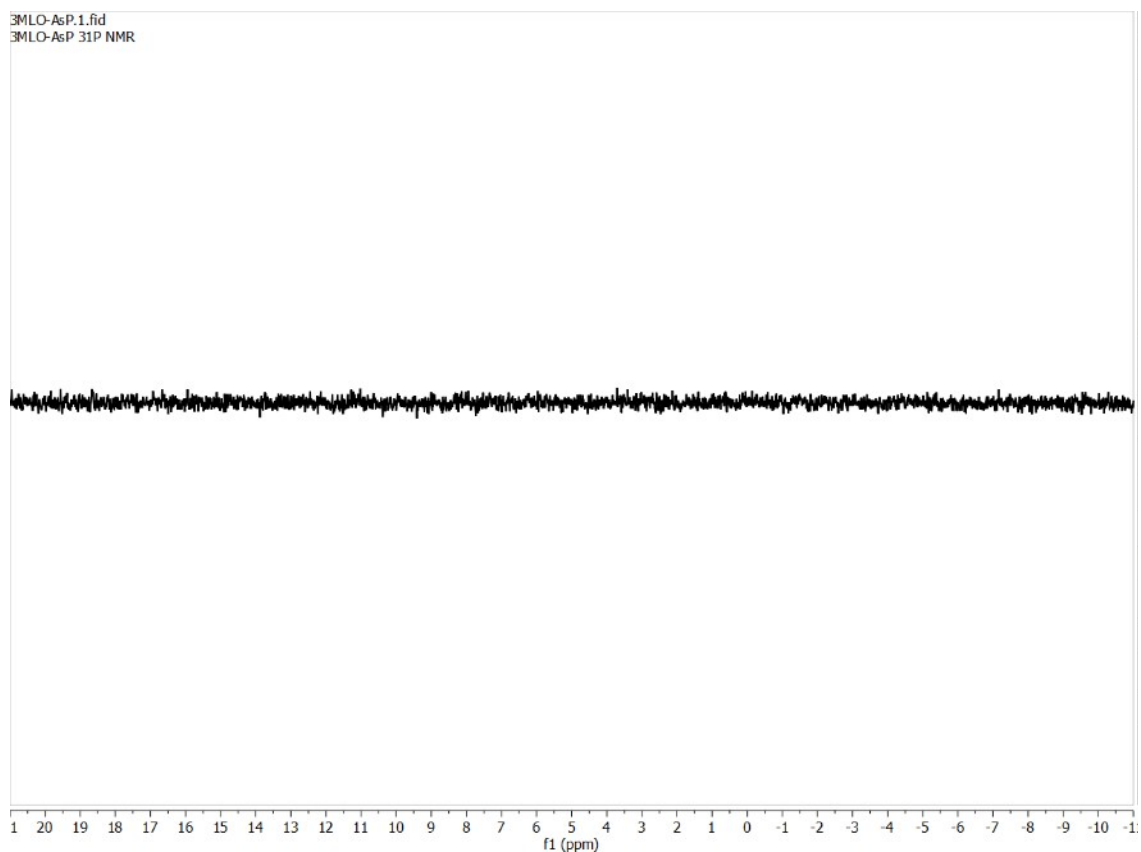

Fig. S27. <sup>31</sup>P-NMR spectrum of the arsenate complex (DMSO-d<sub>6</sub>) extracted in the presence of Na<sub>2</sub>HPO<sub>4</sub> showing the absence of phosphate signal at 8.1 ppm observed in the phosphate complex (see Fig. S8).

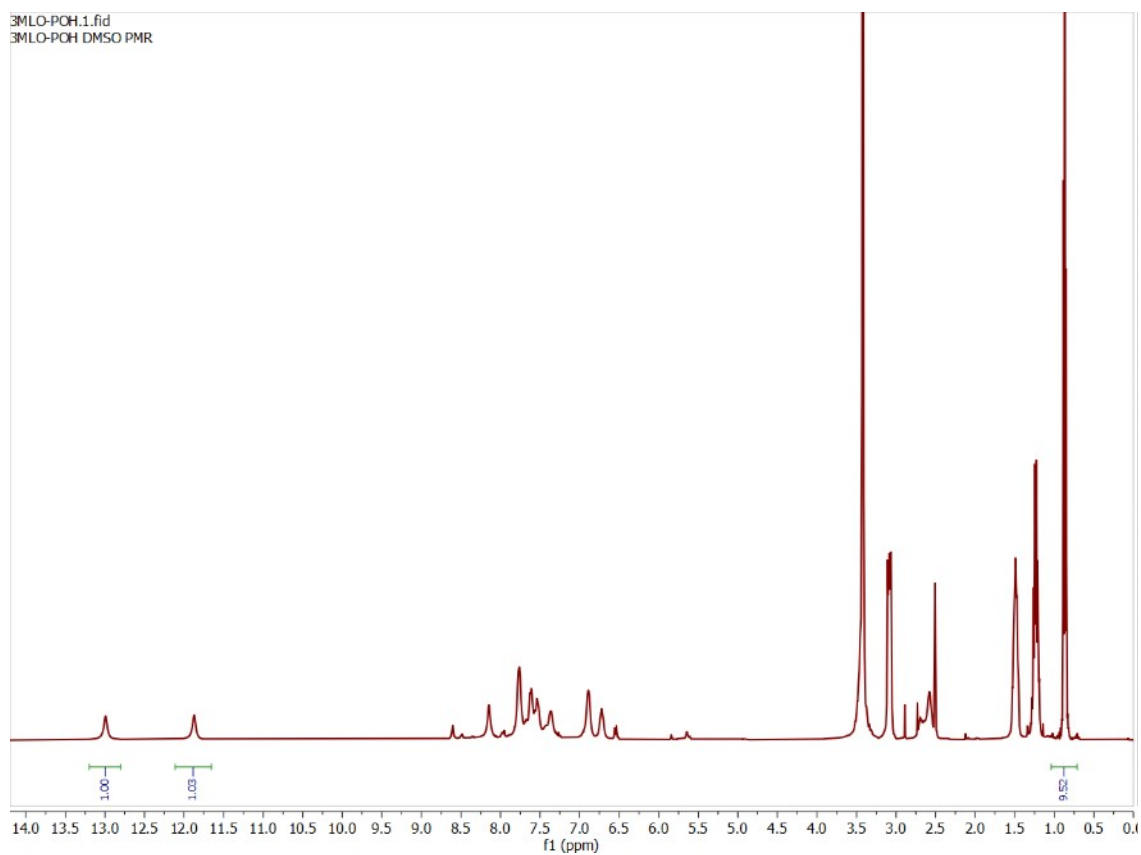

Fig. S28. <sup>1</sup>H-NMR spectrum of the phosphate complex (DMSO-d<sub>6</sub>) extracted in the absence of competitive anions.

## Electronic Supplementary Information

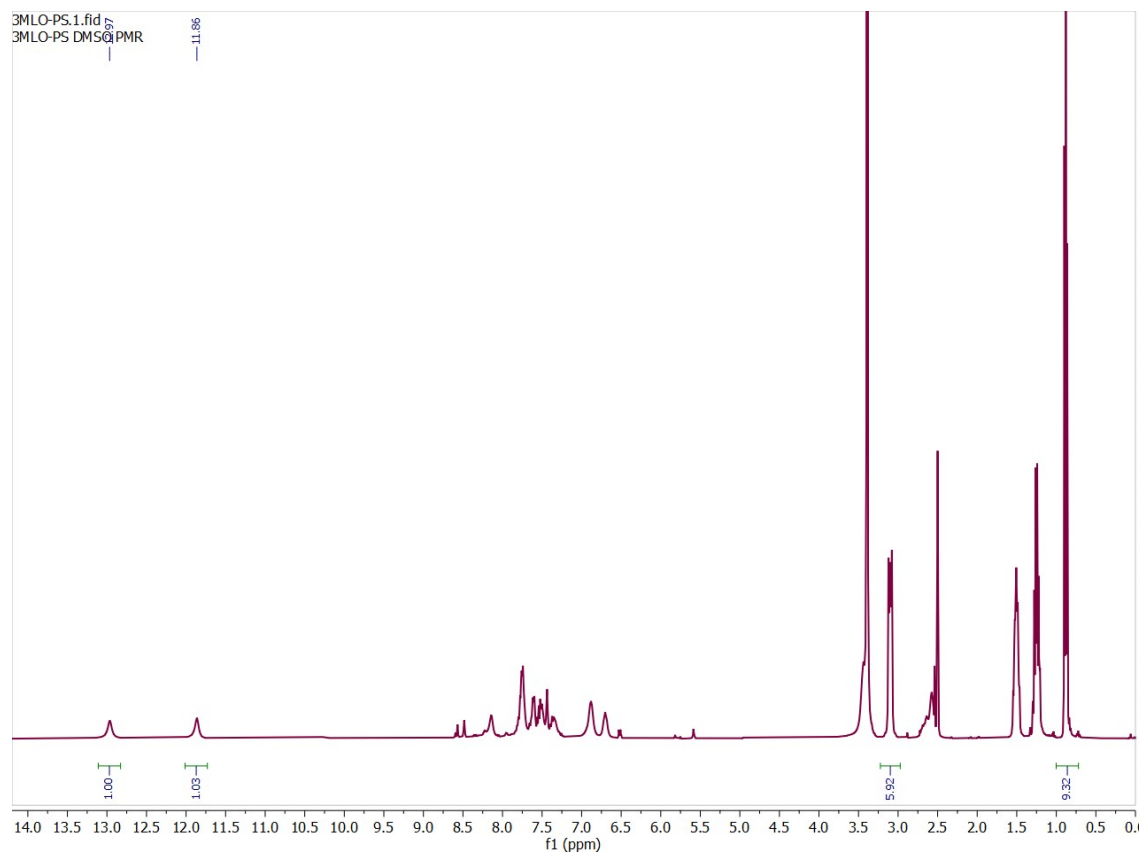

Fig. S29. <sup>1</sup>H-NMR spectrum of phosphate complex (DMSO-d<sub>6</sub>) extracted in the presence of Na<sub>2</sub>SO<sub>4</sub> and NaNO<sub>3</sub>.

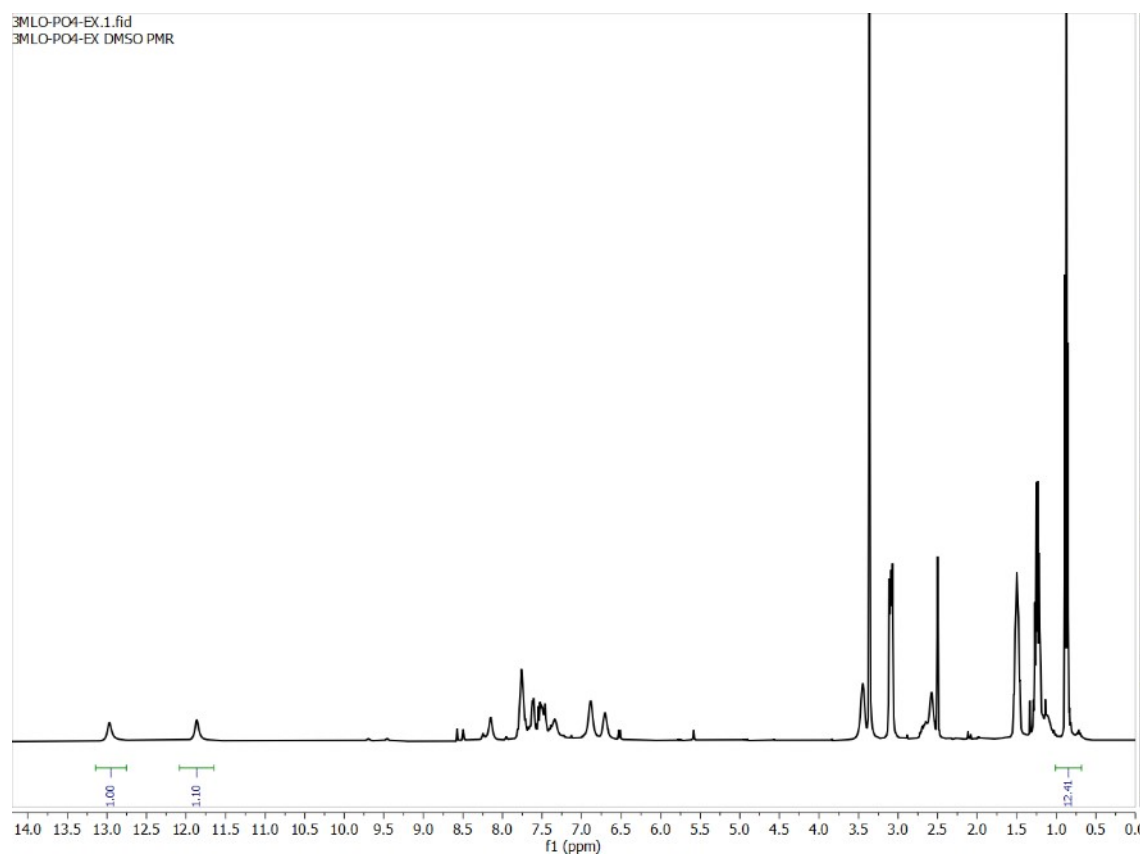

Fig. S30. <sup>1</sup>H-NMR spectrum of the phosphate complex (DMSO-d<sub>6</sub>) extracted in the presence of NaF and NaCl.

## Electronic Supplementary Information

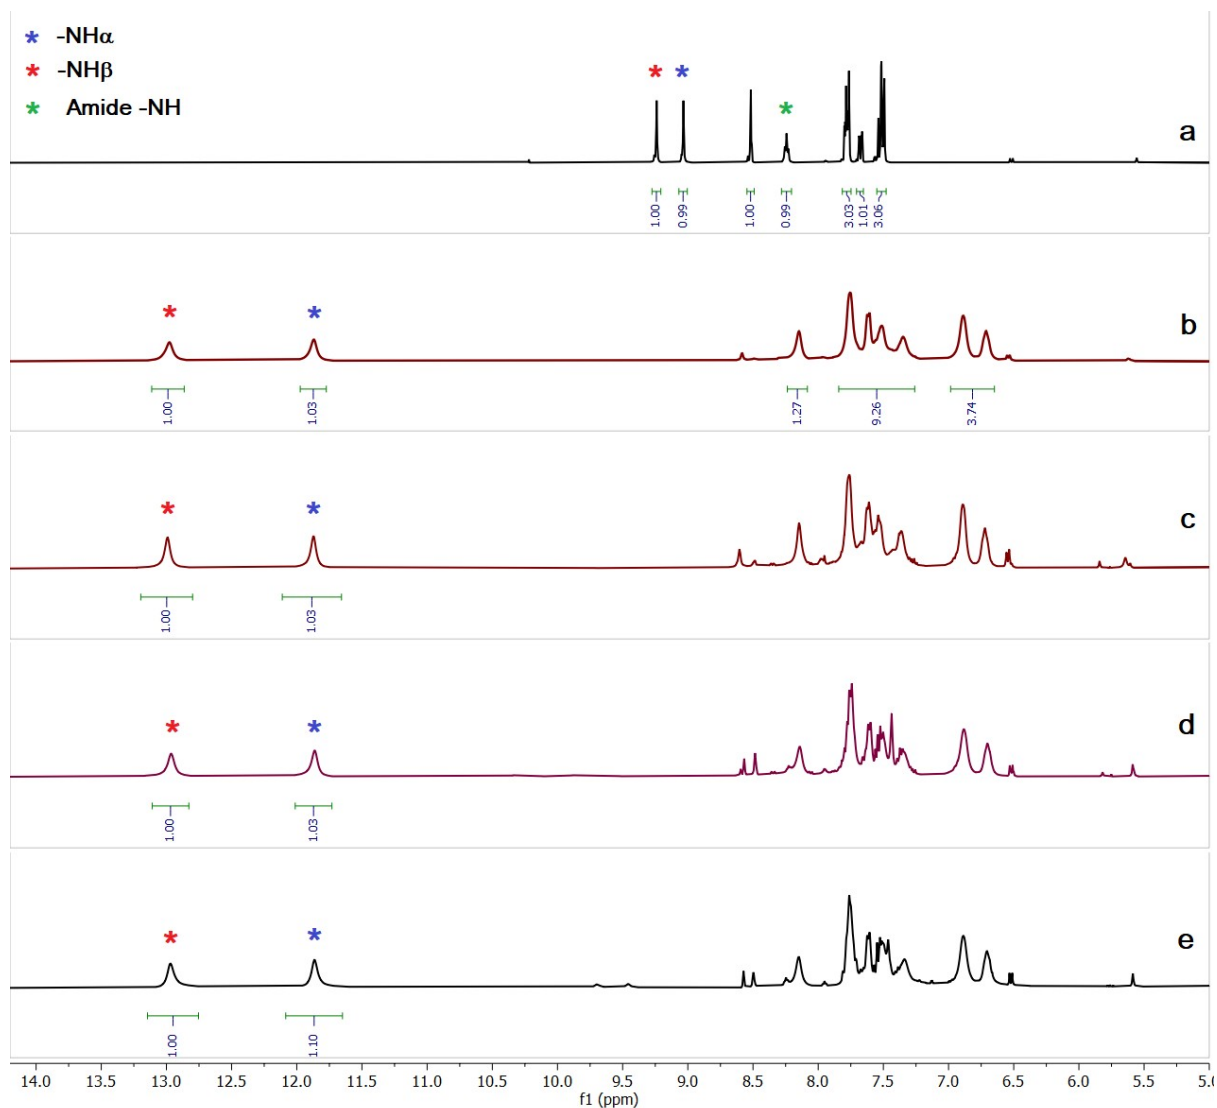

Fig. S31. Aromatic region of the  $^1\text{H-NMR}$  spectra of (a) receptor **L**, (b) crystals of the phosphate complex  $[(n\text{-Bu}_4\text{N})_3(2\text{L}\cdot\text{PO}_4)]$ , (c) phosphate complex extracted in the absence of competitive anions, (d) phosphate complex extracted in the presence of sulfate and nitrate, (e) phosphate complex extracted in the presence of fluoride and chloride.

## Electronic Supplementary Information

### 6. 2D-NOESY NMR, powder XRD and UV-vis spectra of Arsenate and Phosphate complexes.

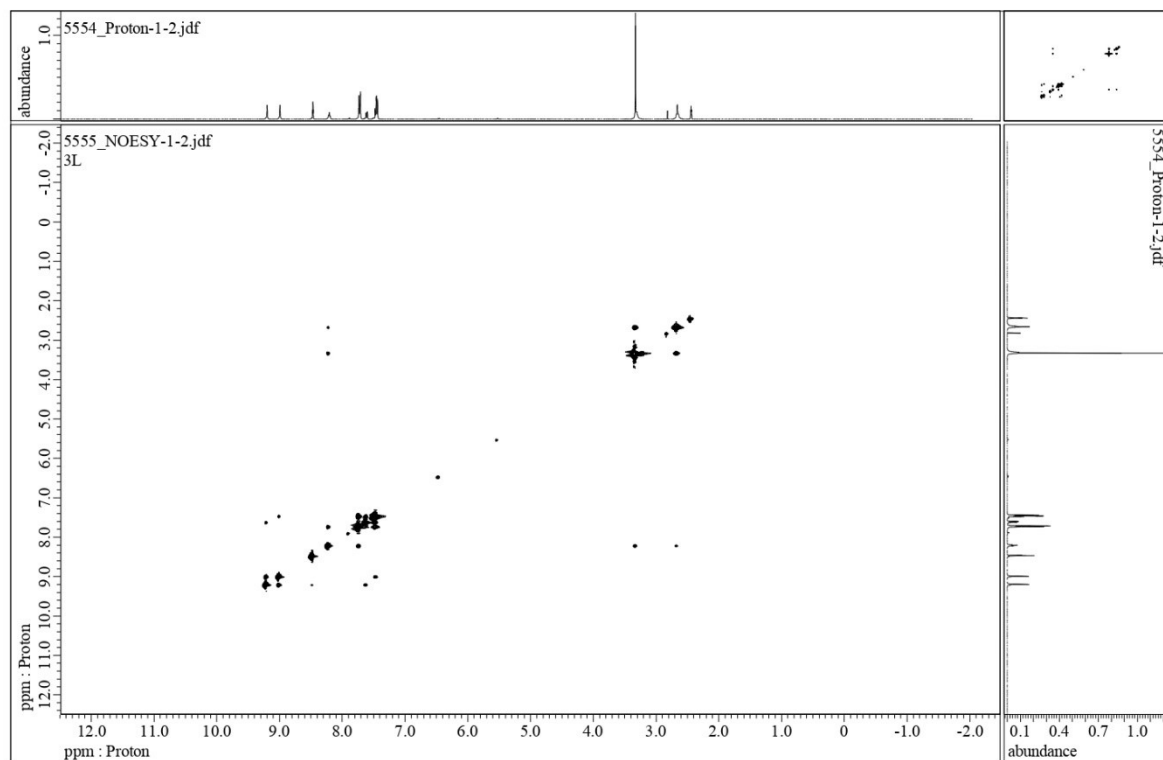

Fig. S32. 2D-NOESY NMR spectrum of receptor **L** in DMSO- $d_6$ .

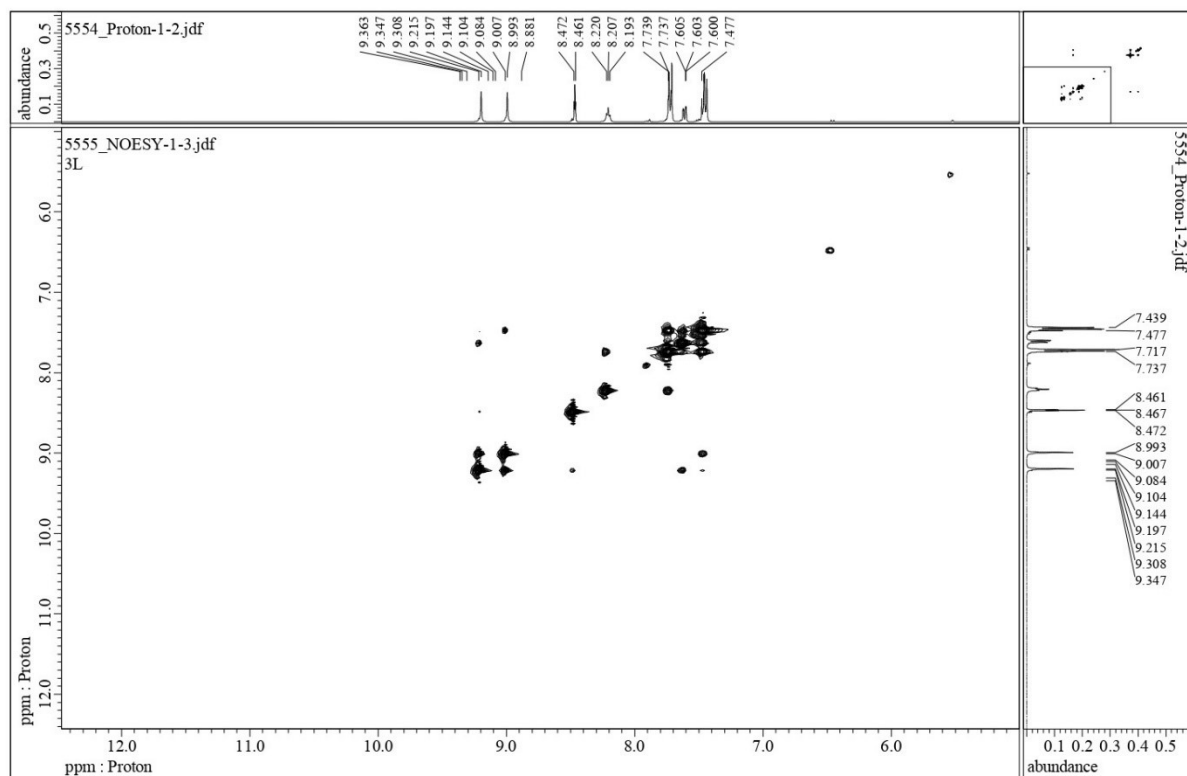

Fig. S33. Aromatic region of the 2D-NOESY NMR spectrum of receptor **L** in DMSO- $d_6$ .

## Electronic Supplementary Information

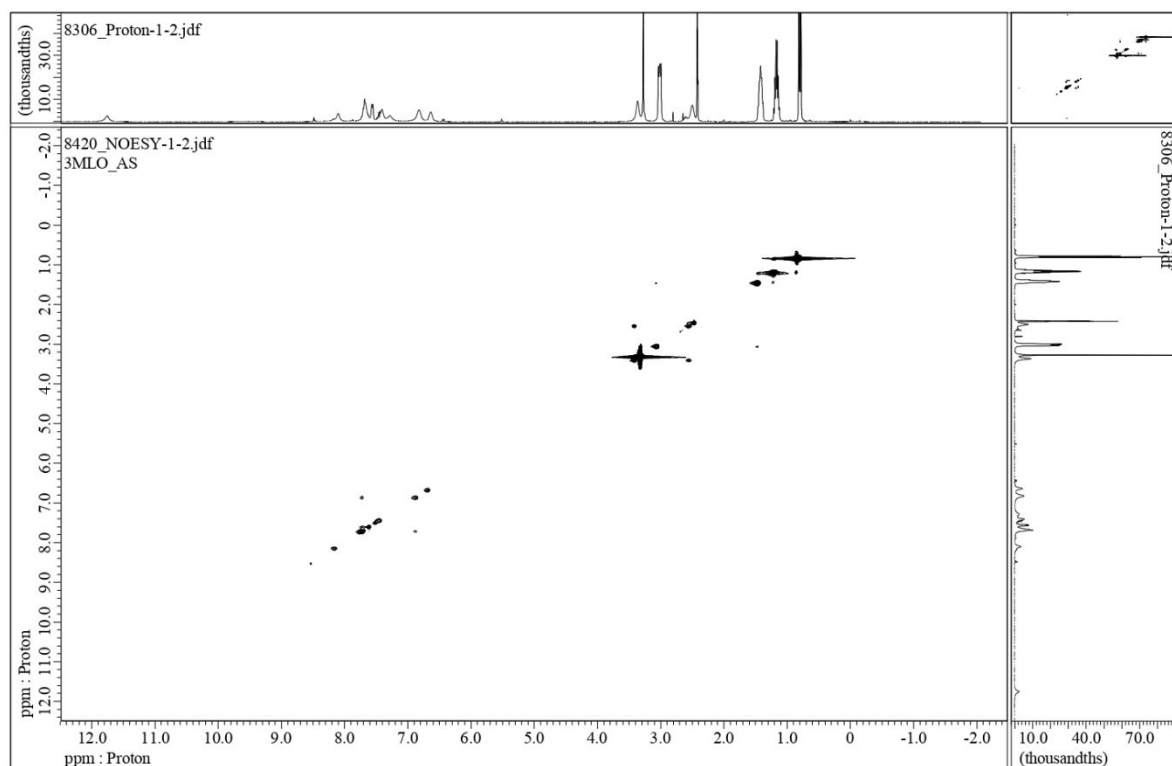

Fig. S34. 2D-NOESY NMR spectrum of the arsenate complex  $[(n\text{-Bu}_4\text{N})_3 \cdot (2\text{L} \cdot \text{AsO}_4)]$  in  $\text{DMSO-d}_6$ .

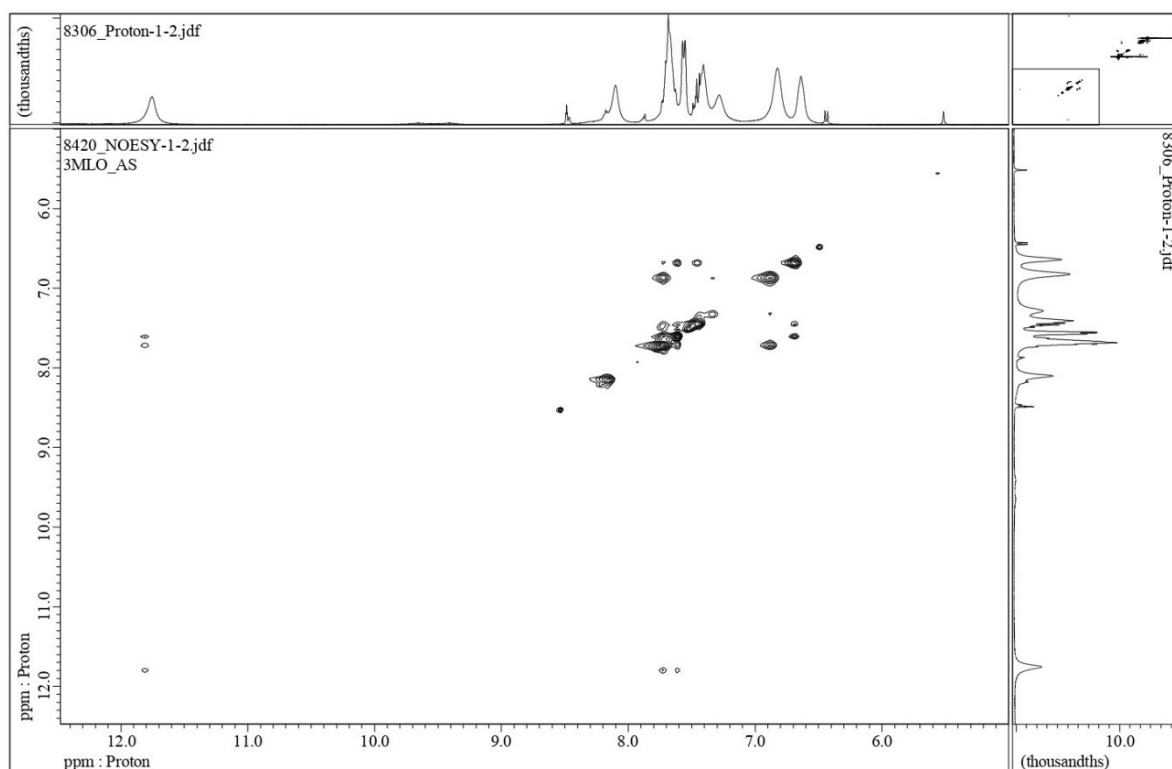

Fig. S35. Aromatic region of the 2D-NOESY NMR spectrum of the arsenate complex  $[(n\text{-Bu}_4\text{N})_3 \cdot (2\text{L} \cdot \text{AsO}_4)]$  in  $\text{DMSO-d}_6$ .

## Electronic Supplementary Information

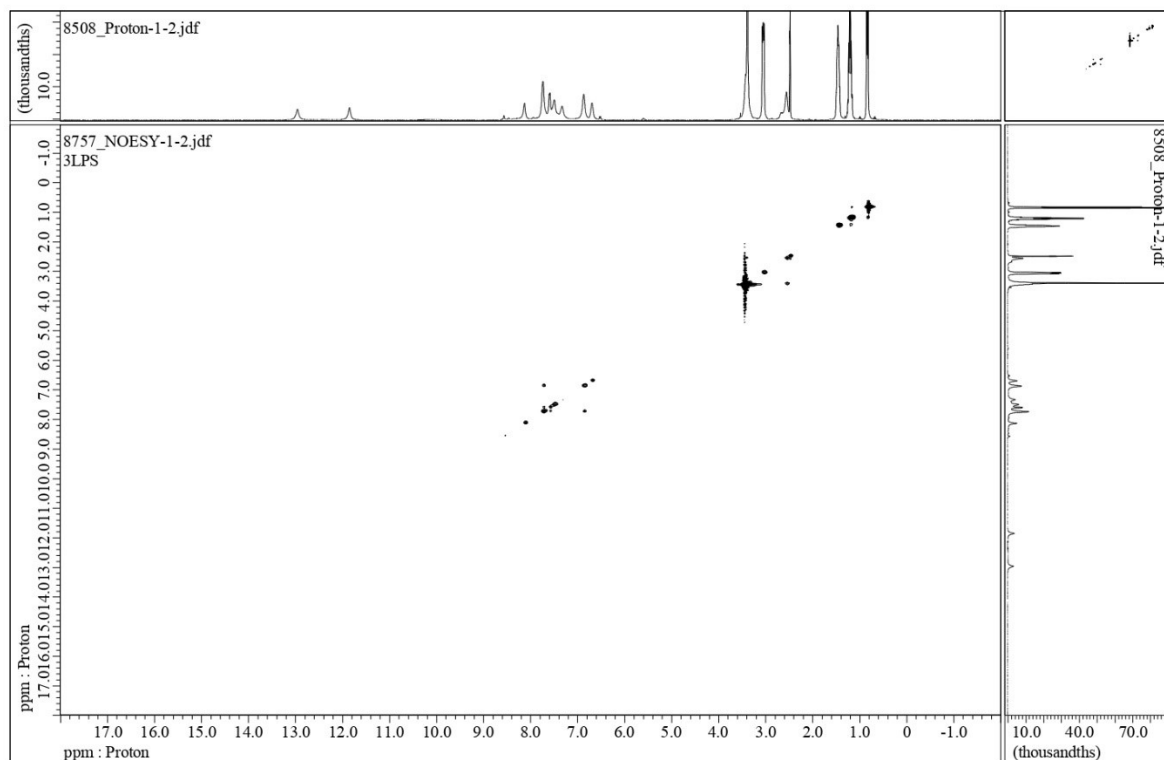

Fig. S36. 2D-NOESY NMR spectrum of the phosphate complex  $[(n\text{-Bu}_4\text{N})_3 \cdot (2\text{L} \cdot \text{PO}_4)]$  in  $\text{DMSO-d}_6$ .

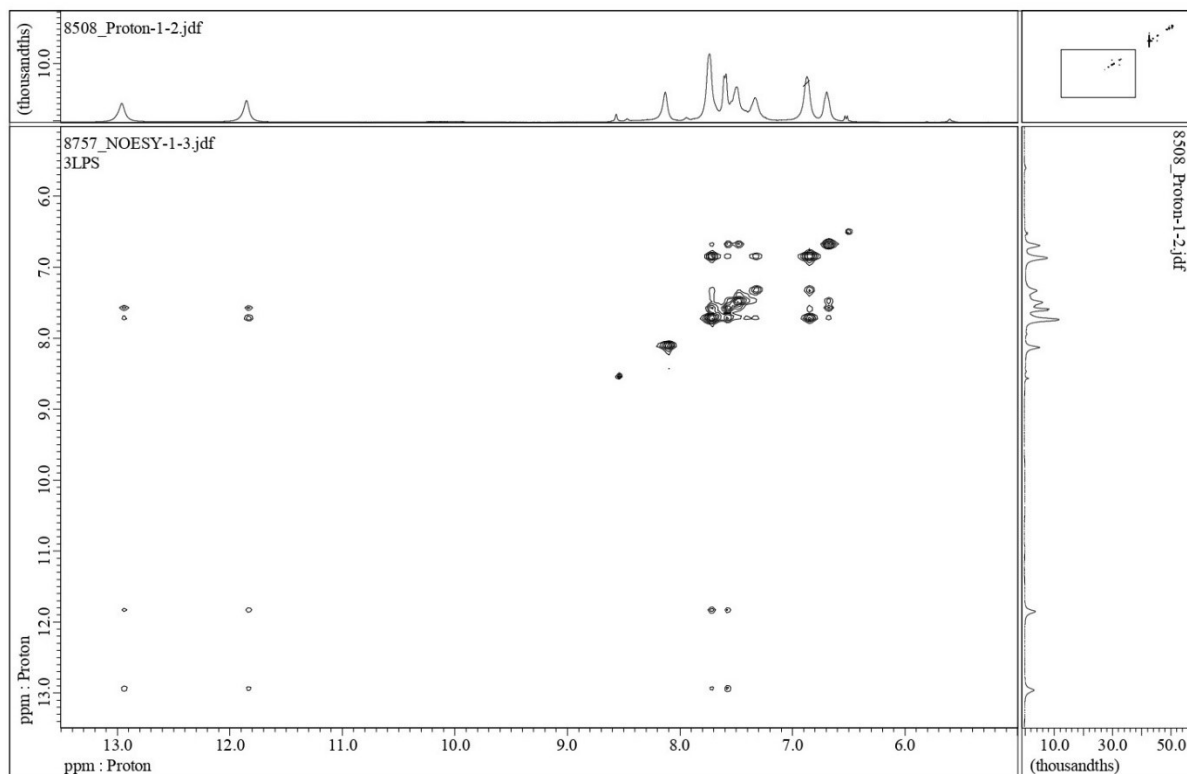

Fig. S37. Aromatic region of the 2D-NOESY NMR spectrum of the phosphate complex  $[(n\text{-Bu}_4\text{N})_3 \cdot (2\text{L} \cdot \text{PO}_4)]$  in  $\text{DMSO-d}_6$ .



## Electronic Supplementary Information

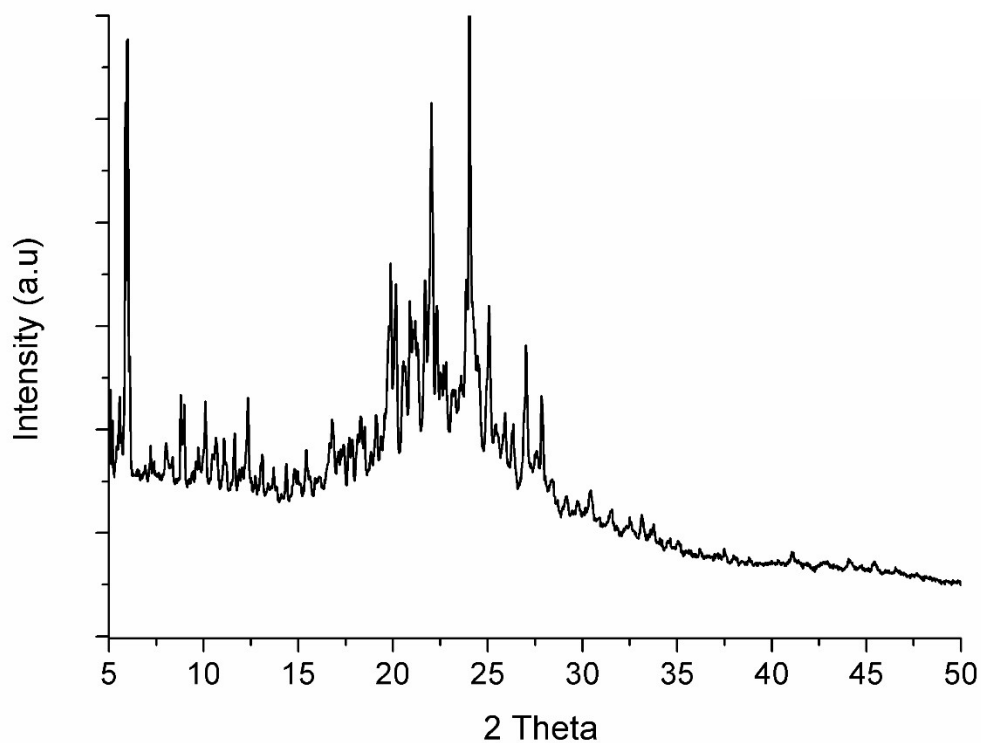

Fig. S38. Powder X-ray diffraction patterns of the bulk crystals of arsenate complex  $[(n\text{-Bu}_4\text{N})_3 \cdot (2\text{L} \cdot \text{AsO}_4)]$  (dried) obtained from a DMSO solution under ambient conditions.

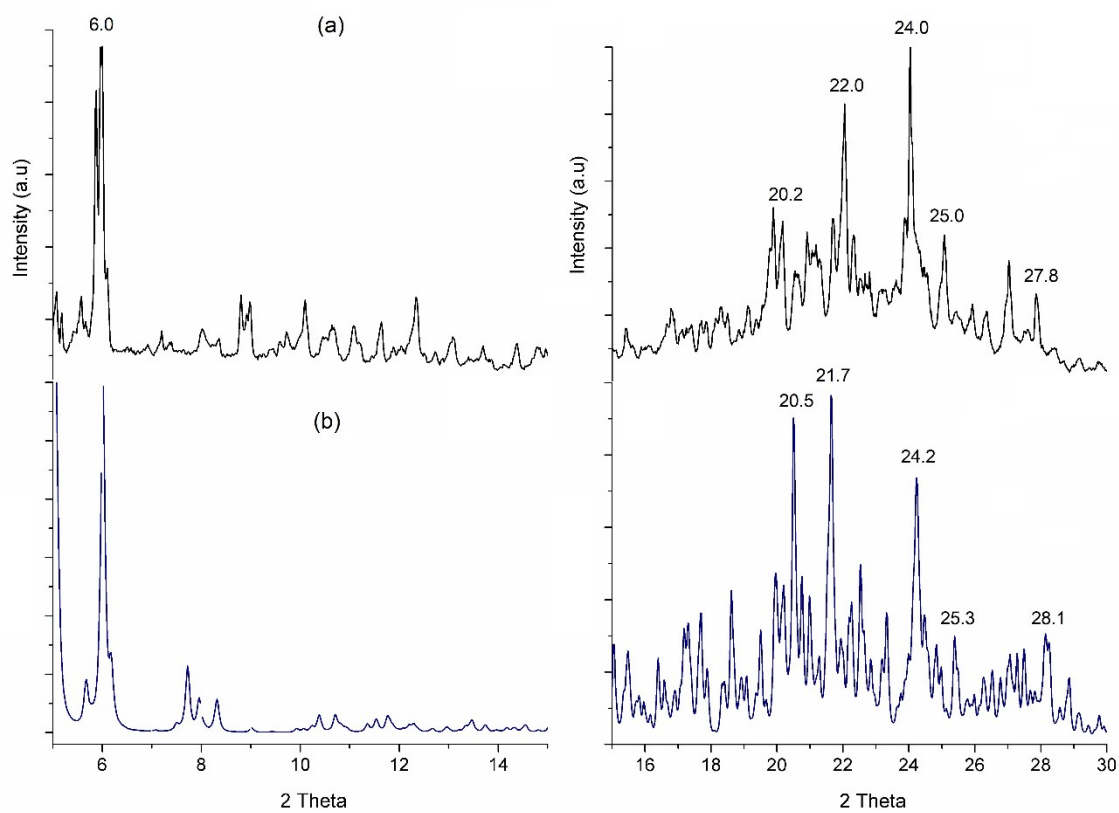

Fig. S39. Powder X-ray diffraction patterns of the bulk crystals of arsenate complex  $[(n\text{-Bu}_4\text{N})_3 \cdot (2\text{L} \cdot \text{AsO}_4)]$  (a, black) and simulated powder X-ray diffraction patterns of the crystal structure  $[(n\text{-Bu}_4\text{N})_3 \cdot (2\text{L} \cdot \text{AsO}_4)]$  (b, blue) separately shown in the  $2\theta$  region of 5–15 and 15–30.

## Electronic Supplementary Information

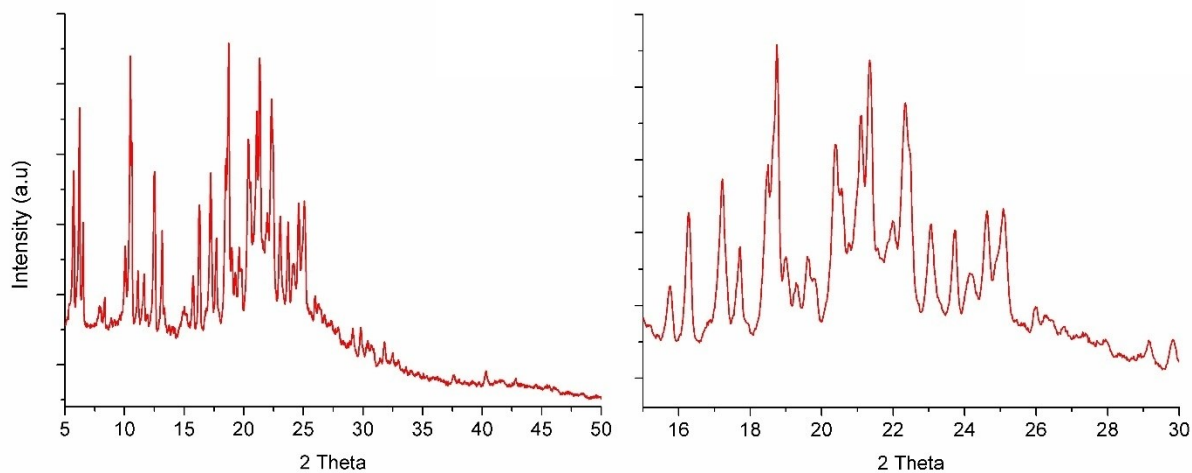

Fig. S40. Powder X-ray diffraction patterns of the bulk crystals of phosphate complex (dried) obtained from a DMSO solution under ambient conditions.

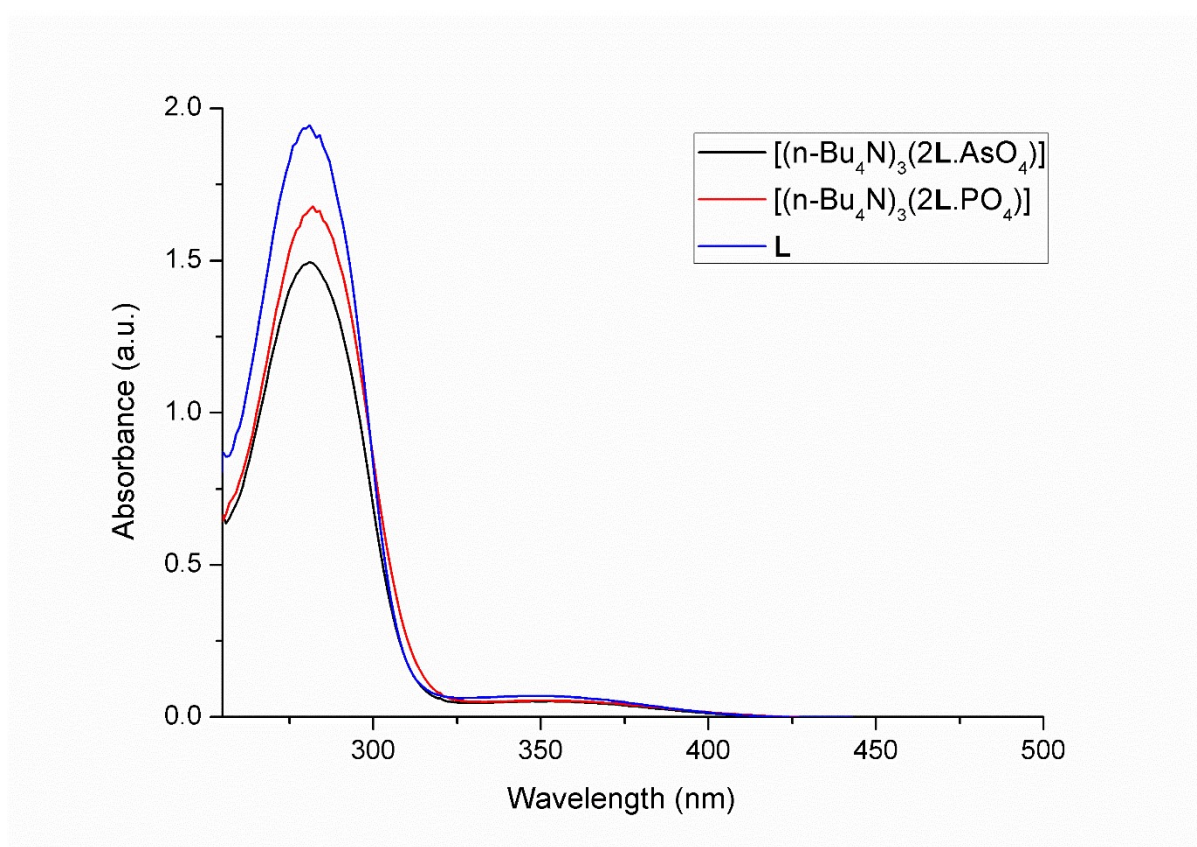

Fig. S41. UV-vis spectra of **L** and oxoanion (arsenate and phosphate) complexes in DMSO.

## Electronic Supplementary Information

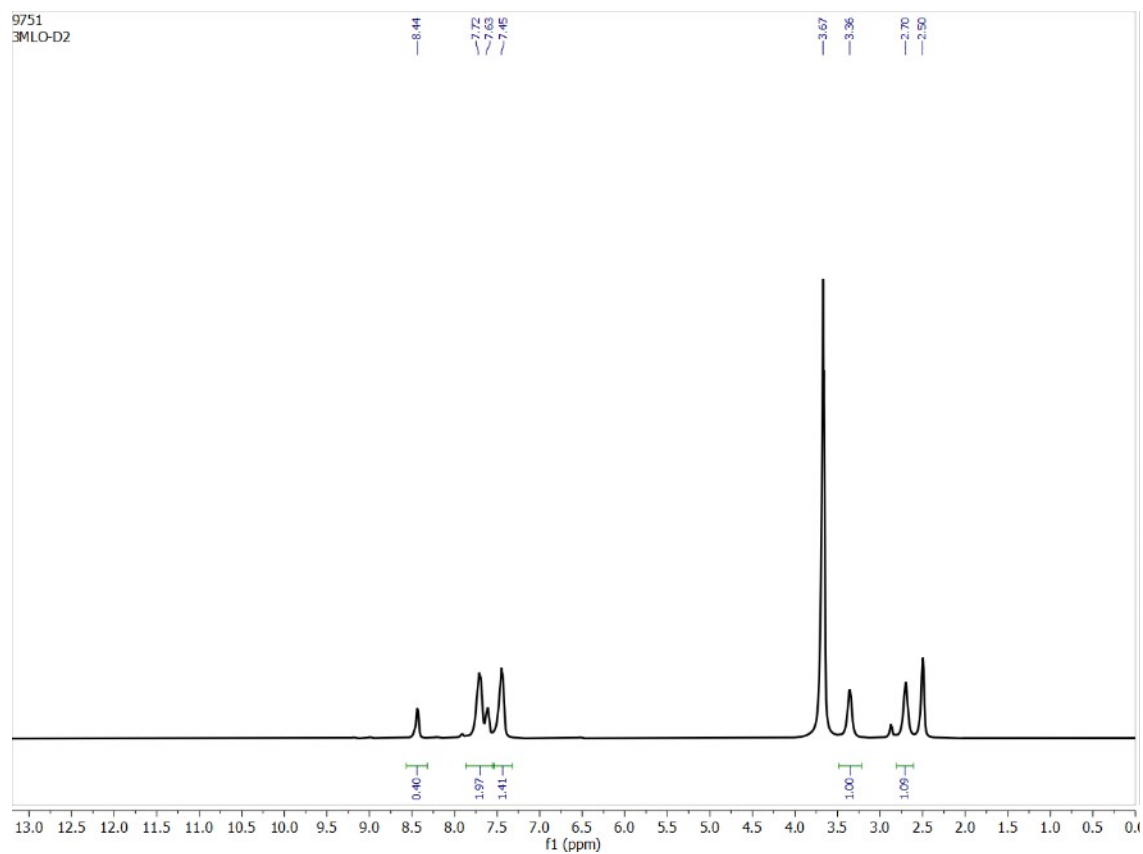

Fig. S42.  $^1\text{H-NMR}$  spectrum of the receptor **L** in  $\text{DMSO-d}_6/\text{D}_2\text{O}$  (9:1, v/v) solution.

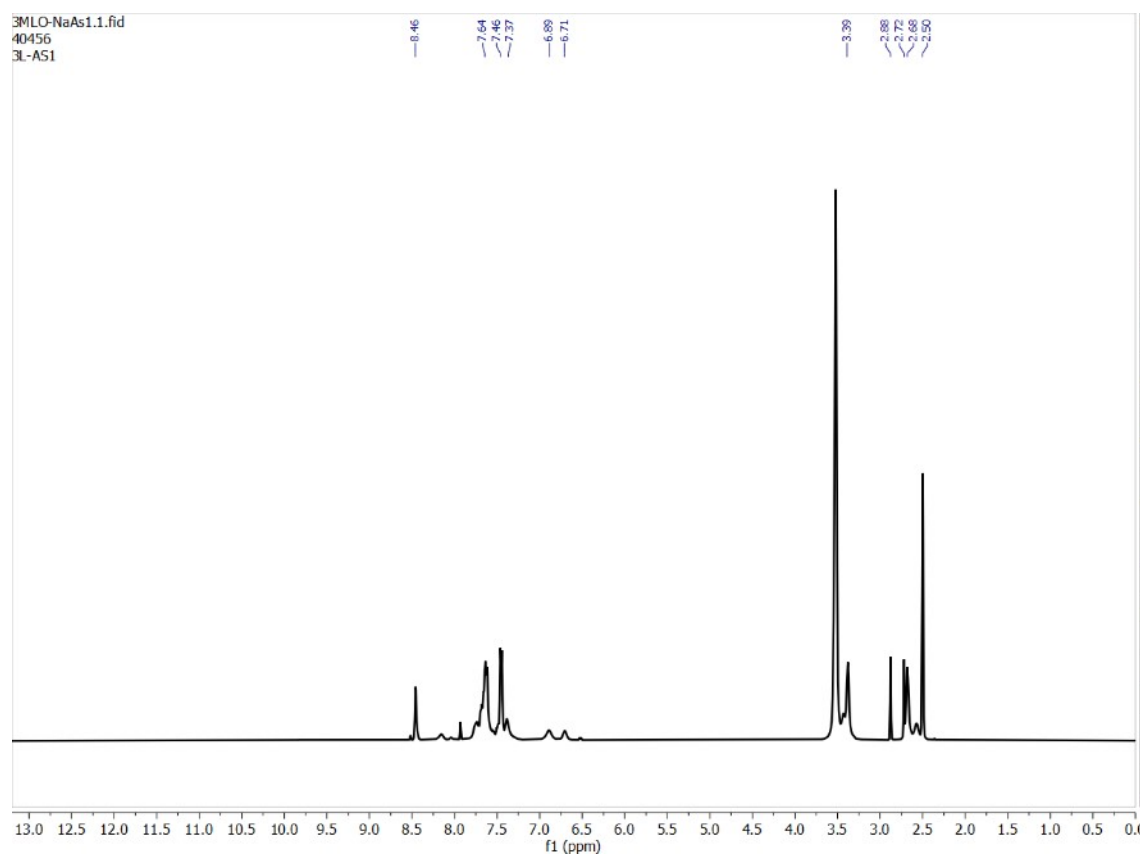

Fig. S43.  $^1\text{H-NMR}$  spectrum of **L** upon addition of 0.5 equiv. of  $\text{Na}_2\text{HAsO}_4$  solution in  $\text{DMSO-d}_6/\text{D}_2\text{O}$  (9:1, v/v).

## Electronic Supplementary Information

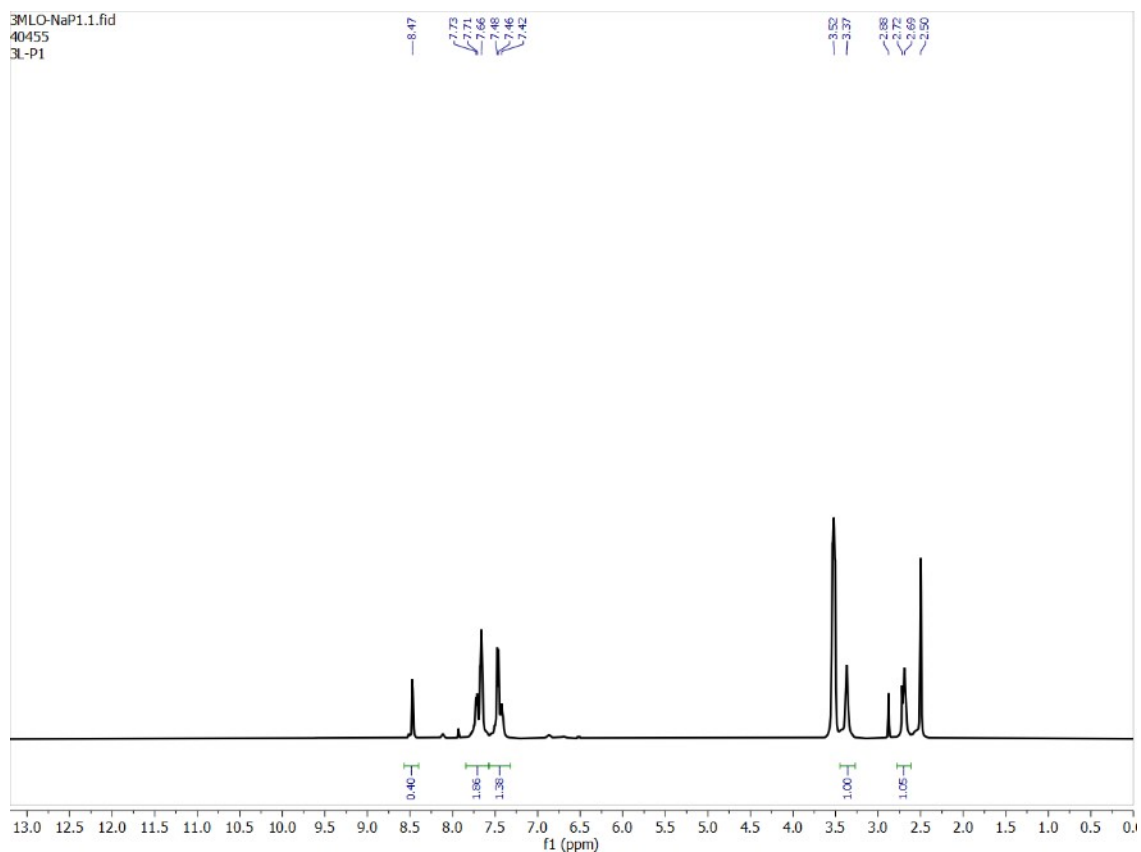

Fig. S44.  $^1\text{H-NMR}$  spectrum of **L** upon addition of 0.5 equiv. of  $\text{Na}_2\text{HPO}_4$  solution in  $\text{DMSO-d}_6/\text{D}_2\text{O}$  (9:1, v/v).

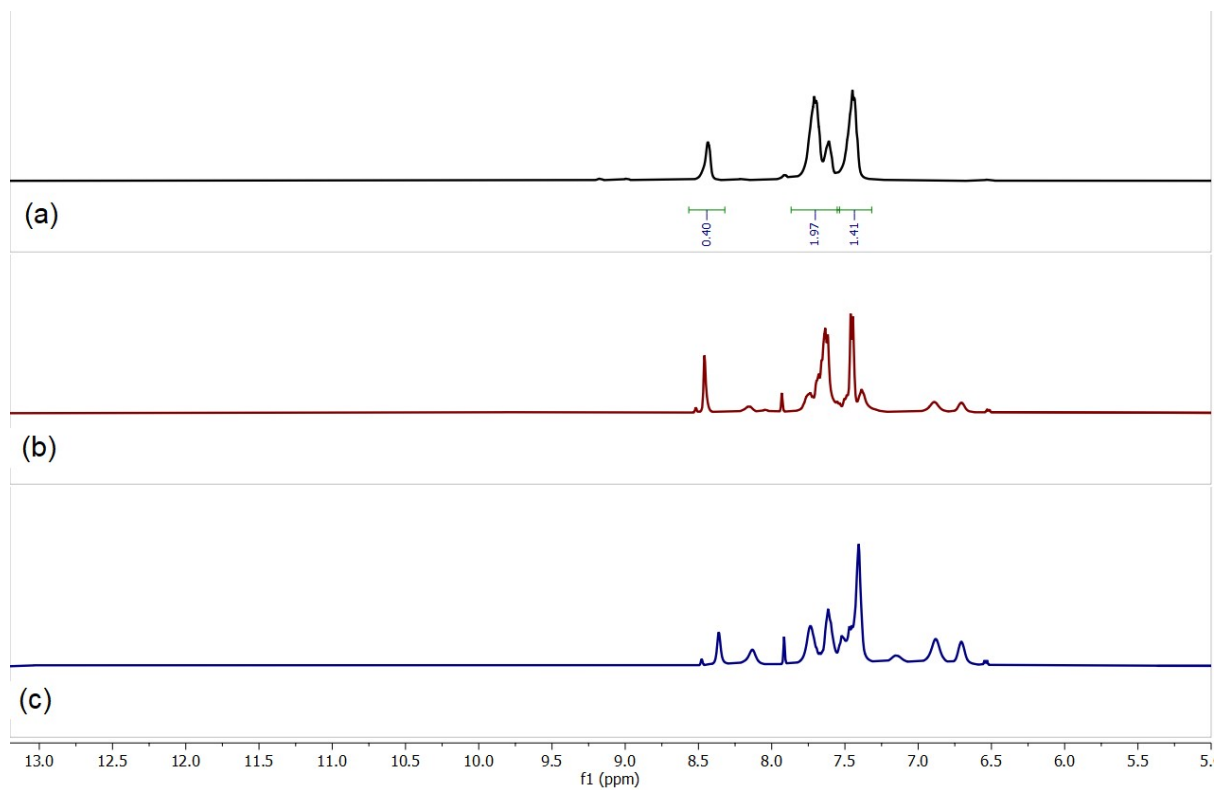

Fig. S45.  $^1\text{H-NMR}$  spectrum of (a) receptor **L** (b) **L** upon addition of 0.5 equivalent of  $\text{Na}_2\text{HAsO}_4$  and (c) **L** upon addition of 1.0 equivalent of  $\text{Na}_2\text{HAsO}_4$  in  $\text{DMSO-d}_6/\text{D}_2\text{O}$  (9:1, v/v).

## Electronic Supplementary Information

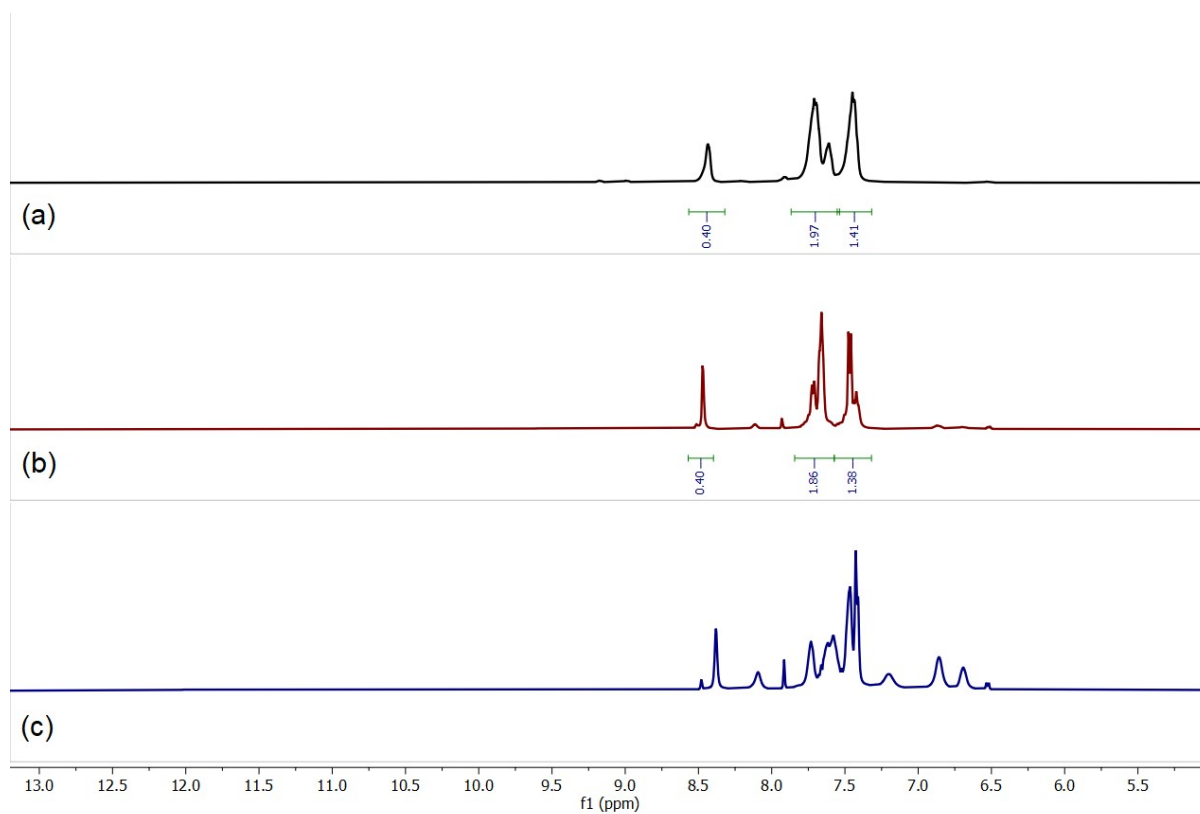

Fig. S46.  $^1\text{H-NMR}$  spectrum of (a) receptor **L** (b) **L** upon addition of 0.5 equivalent of  $\text{Na}_2\text{HPO}_4$  (c) **L** upon addition of 1.0 equivalent of  $\text{Na}_2\text{HPO}_4$  in  $\text{DMSO-}D_6/D_2O$  (9:1, v/v).

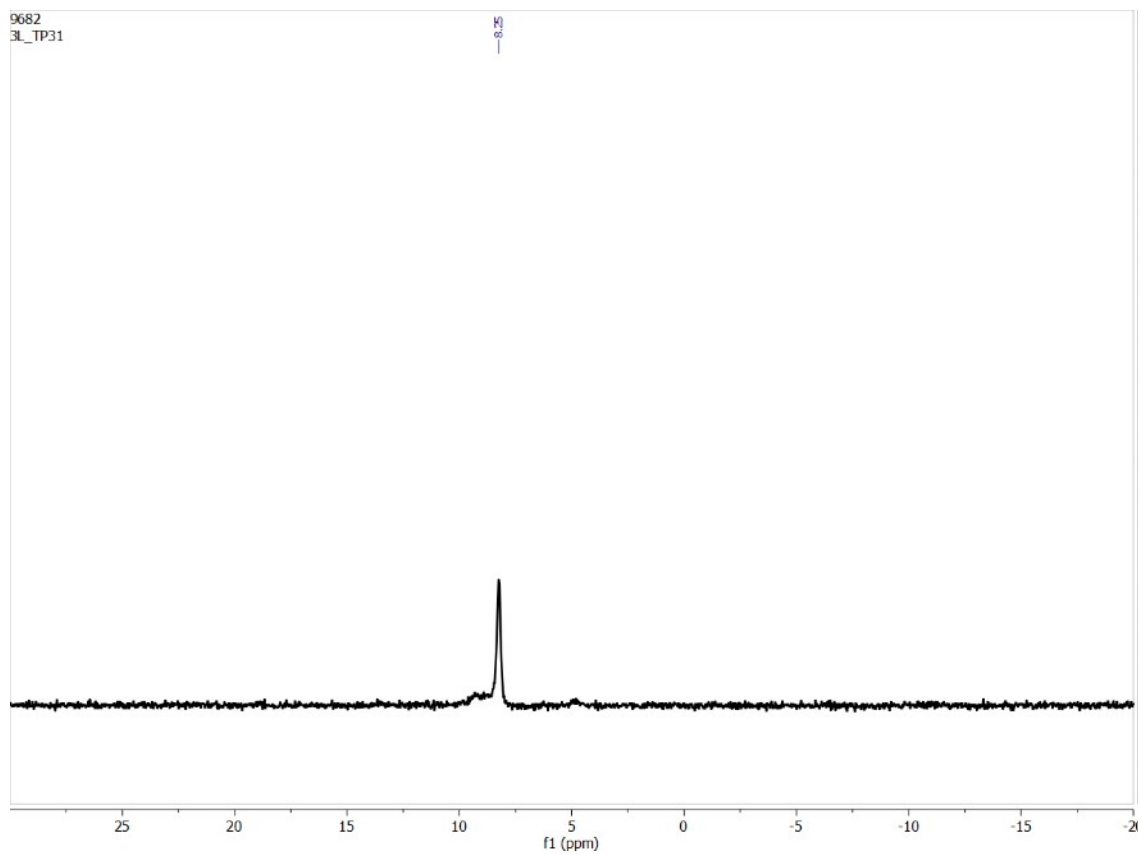

Fig. S47.  $^{31}\text{P}$  NMR spectrum of the crystals of phosphate complex  $[(n\text{-Bu}_4\text{N})_3\cdot(2\text{L}\cdot\text{PO}_4)]$  in  $\text{DMSO-}d_6/D_2O$  (9:1).

## Electronic Supplementary Information

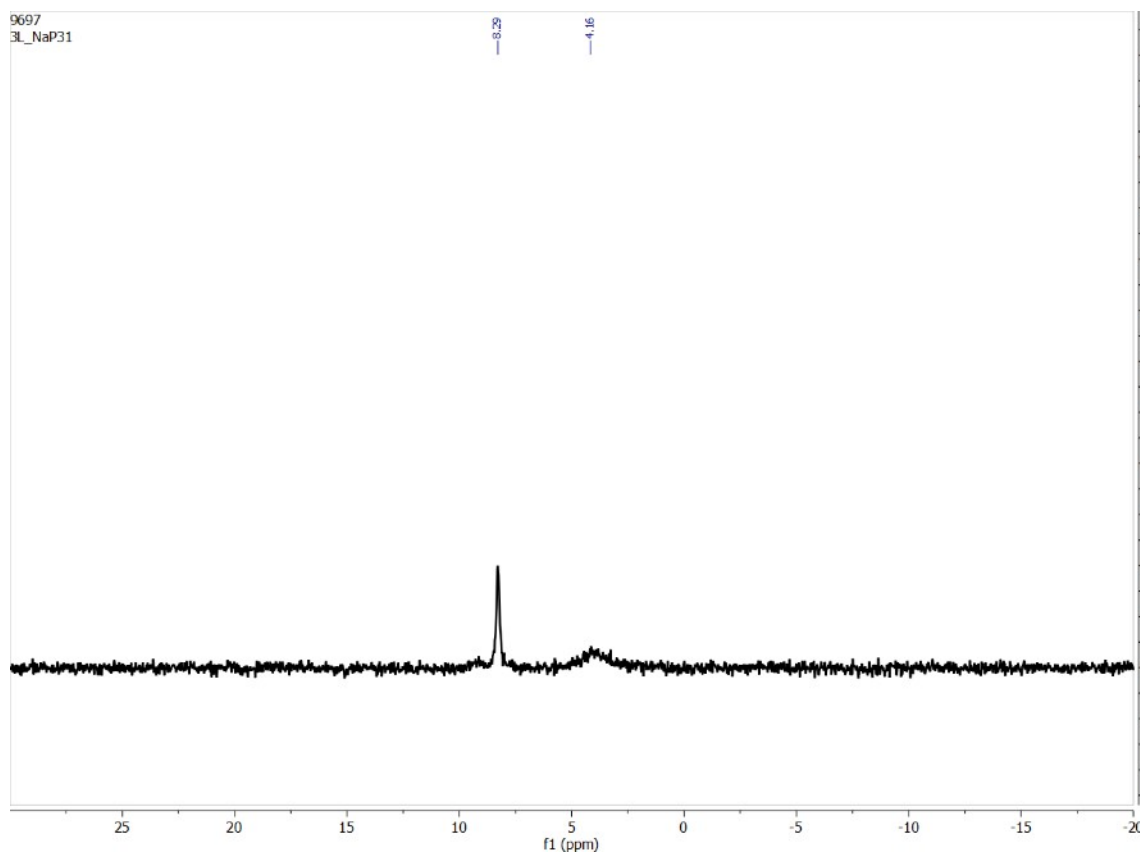

Fig. S48.  $^{31}\text{P}$  NMR spectrum of **L** upon addition of 1.0 equivalent of  $\text{Na}_2\text{HPO}_4$  in  $\text{DMSO-d}_6/\text{D}_2\text{O}$  (9:1, v/v).

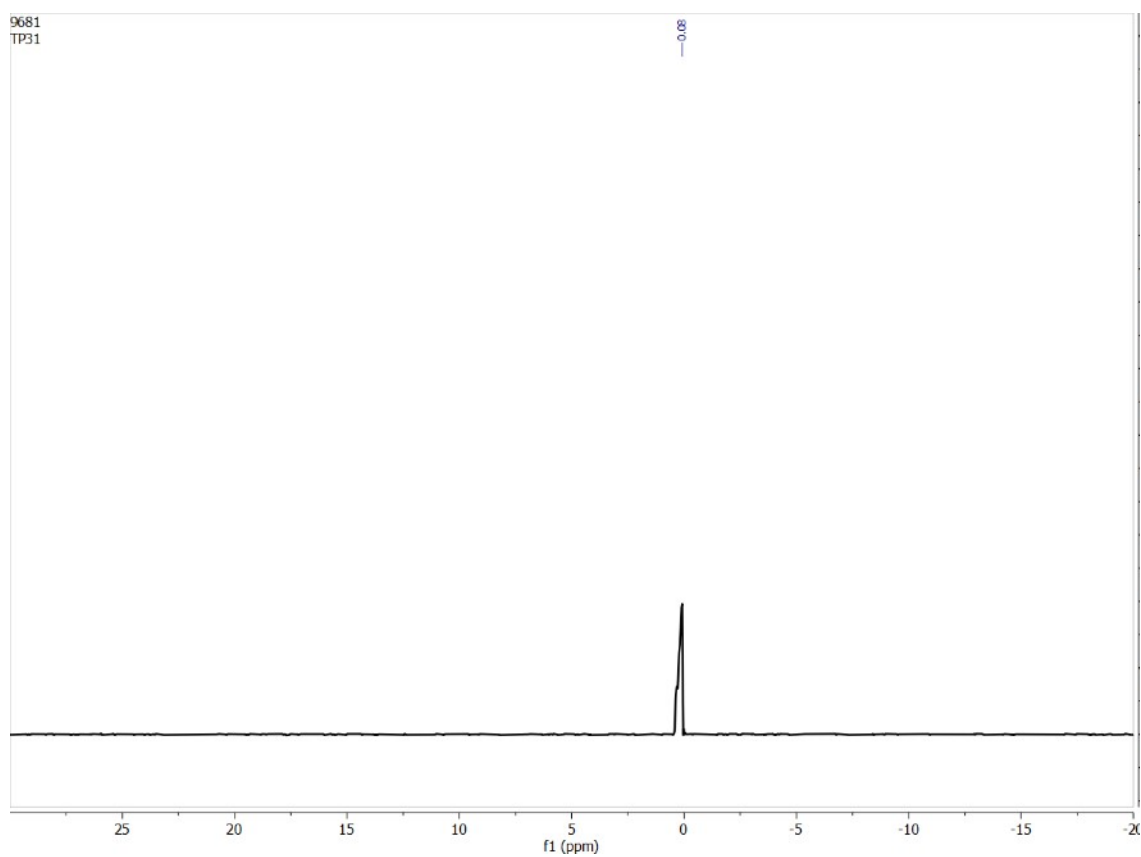

Fig. S49.  $^{31}\text{P}$  NMR spectrum of  $(\text{n-Bu}_4\text{N}^+)\text{H}_2\text{PO}_4^-$  in  $\text{DMSO-d}_6/\text{D}_2\text{O}$  (9:1, v/v).

## Electronic Supplementary Information

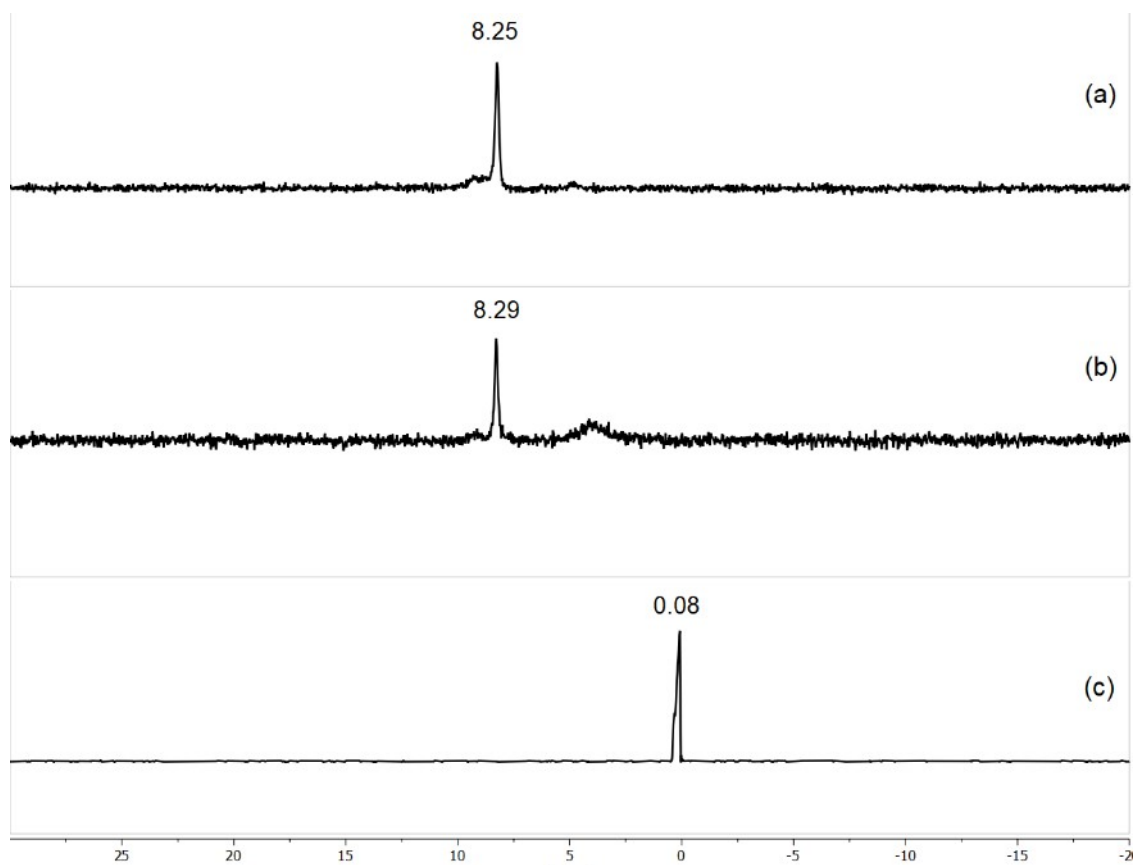

Fig. S50.  $^{31}\text{P}$  NMR spectrum of (a) crystals of phosphate complex, (b) **L** in the presence of 1.0 equivalent of  $(n\text{-Bu}_4\text{N}^+)\text{H}_2\text{PO}_4^-$  and (c)  $(n\text{-Bu}_4\text{N}^+)\text{H}_2\text{PO}_4^-$  in  $\text{DMSO-d}_6/\text{D}_2\text{O}$  (9:1, v/v).

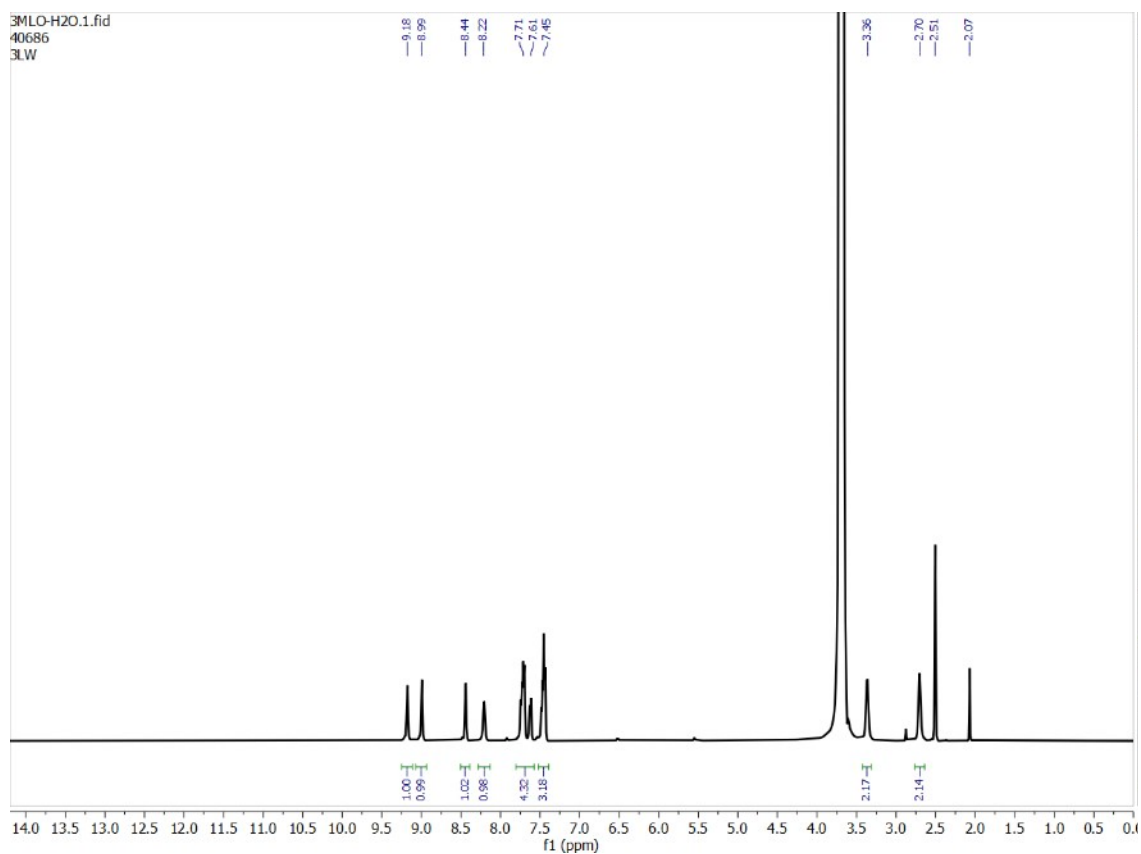

Fig. S51.  $^1\text{H}$ -NMR spectrum of **L** in  $\text{DMSO-d}_6/\text{H}_2\text{O}$  (9:1, v/v).

## Electronic Supplementary Information

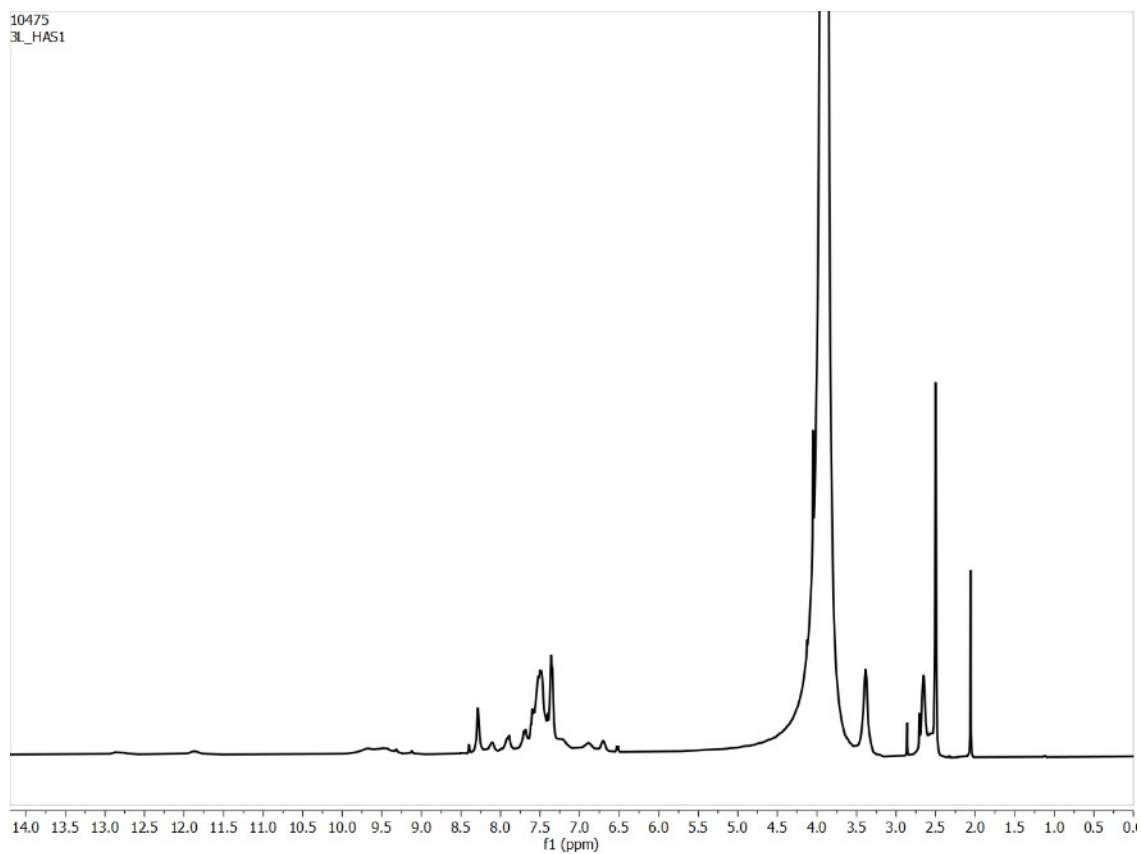

Fig. S52.  $^1\text{H-NMR}$  spectrum of **L** in  $\text{DMSO-d}_6/\text{H}_2\text{O}$  (9:1, v/v) upon addition of 0.25 equiv. of  $\text{Na}_2\text{HAsO}_4$ .

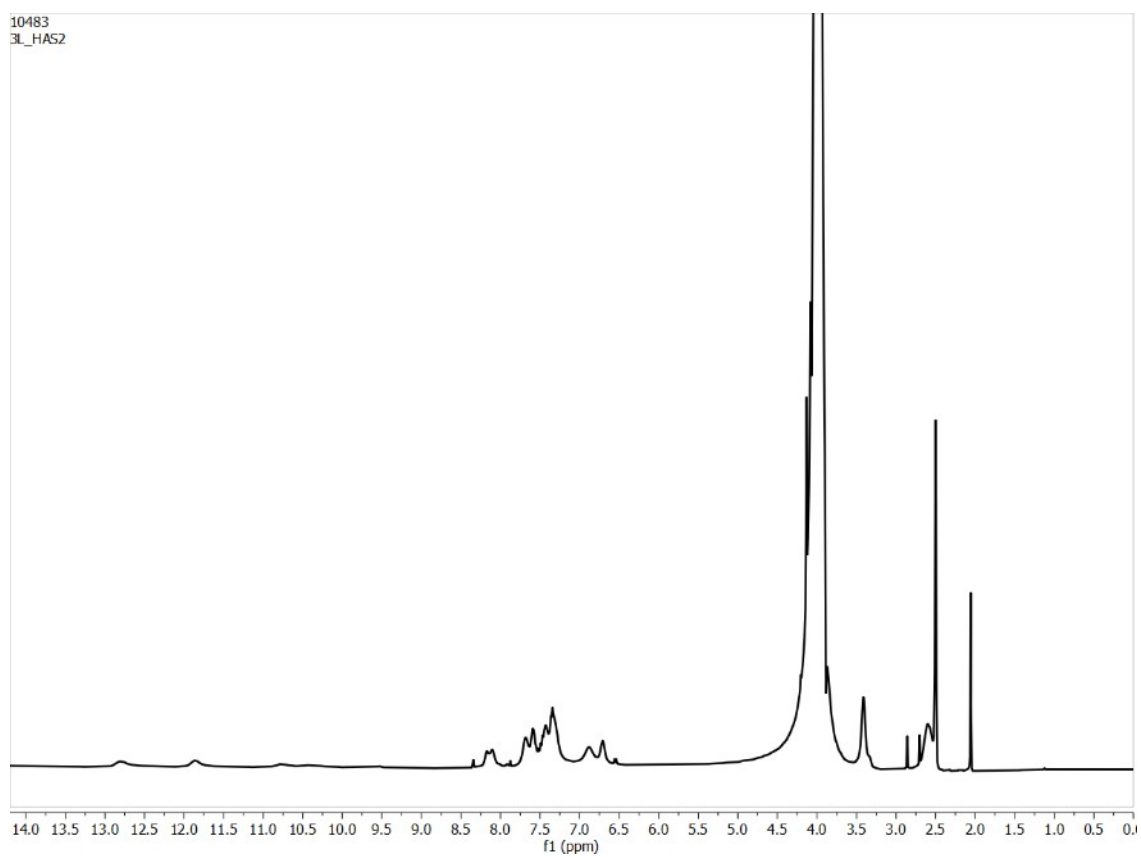

Fig. S53.  $^1\text{H-NMR}$  spectrum of **L** in  $\text{DMSO-d}_6/\text{H}_2\text{O}$  (9:1, v/v) upon addition of 0.50 equiv. of  $\text{Na}_2\text{HAsO}_4$ .



## Electronic Supplementary Information

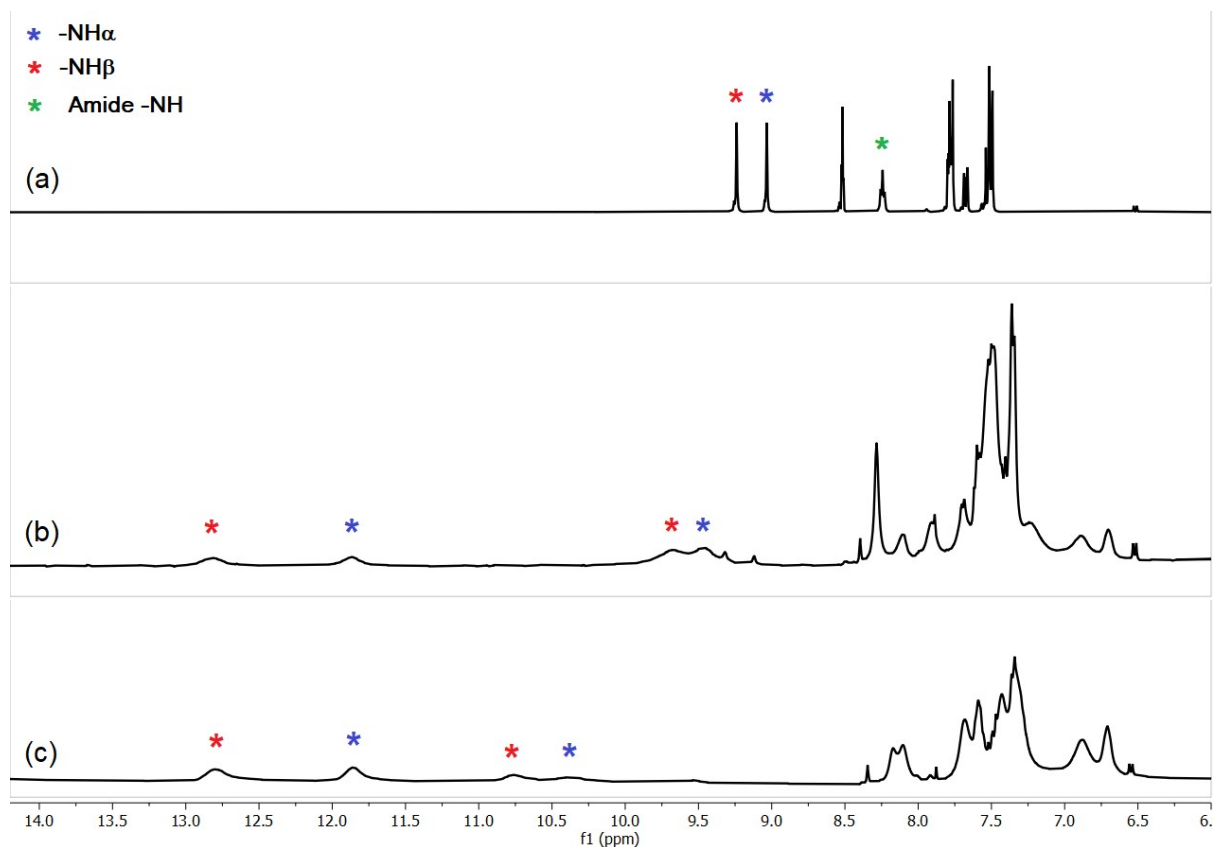

Fig. S54. Aromatic region of the <sup>1</sup>H-NMR spectrum of (a) L (b) L upon addition of 0.25 equiv. of Na<sub>2</sub>HAsO<sub>4</sub>, (c) L upon addition of 0.50 equiv. of Na<sub>2</sub>HAsO<sub>4</sub> in DMSO-d<sub>6</sub>/H<sub>2</sub>O (9:1, v/v).

### 7. DFT calculation results and energy optimized structures of receptor-oxoanion complexes

**Table S1:** Binding Energy (B.E.) of 2:1 receptor-oxoanion complexes obtained from DFT calculations at the B97D/6-31G\*\* level of theory, B.E. = (E<sub>receptor</sub> + E<sub>anion</sub>) – E<sub>complex</sub>

|                                                            | E <sub>complex</sub> | E <sub>receptor</sub> | E <sub>anion</sub> | B.E. (Hartree) | B.E. (kJ/mol)  |
|------------------------------------------------------------|----------------------|-----------------------|--------------------|----------------|----------------|
| [(Bu <sub>4</sub> N) <sub>3</sub> ·(2L·AsO <sub>4</sub> )] | -11489.628909        | -8954.4745209         | -2533.789334       | -1.36505339    | <b>-3583.9</b> |
| [(Bu <sub>4</sub> N) <sub>3</sub> ·(2L·PO <sub>4</sub> )]  | -9597.3338541        | -8954.4745209         | -641.5205039       | -1.33882936    | <b>-3515.1</b> |
| [(Bu <sub>4</sub> N) <sub>2</sub> ·(2L·SO <sub>4</sub> )]  | -8968.1216190        | -8269.0236106         | -698.5572158       | -0.54079263    | <b>-1419.9</b> |
| [(Bu <sub>4</sub> N) <sub>2</sub> ·(2L·CO <sub>3</sub> )]  | -8533.0941511        | -8269.0236106         | -263.4374540       | -0.63308653    | <b>-1662.2</b> |
| [(Bu <sub>4</sub> N)·(2L·NO <sub>3</sub> )]                | -7902.9938370        | -7622.5532129         | -280.1429494       | -0.29767465    | <b>-781.50</b> |

## Electronic Supplementary Information

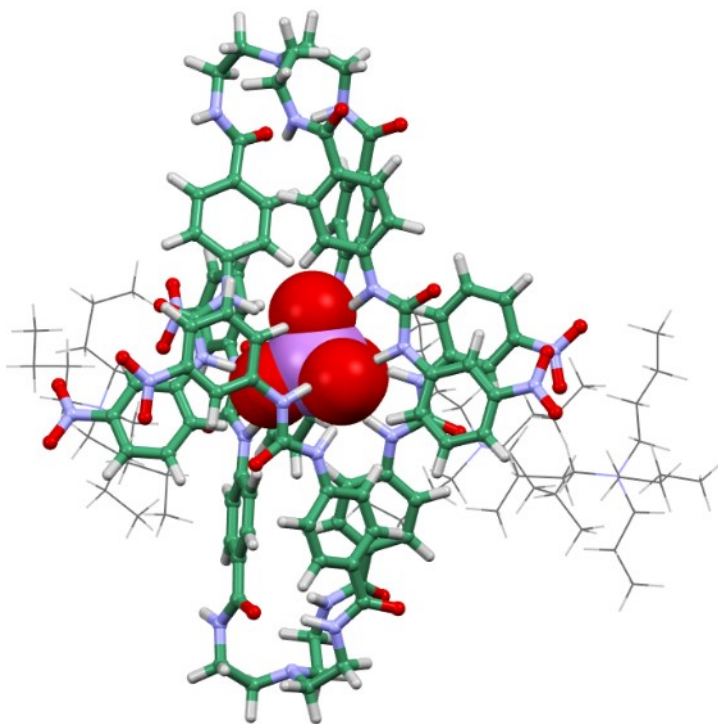

Fig S55. Energy optimized structure of the arsenate complex  $[(n\text{-Bu}_4\text{N})_3 \cdot (2\text{L} \cdot \text{AsO}_4)]$  obtained from DFT calculations.

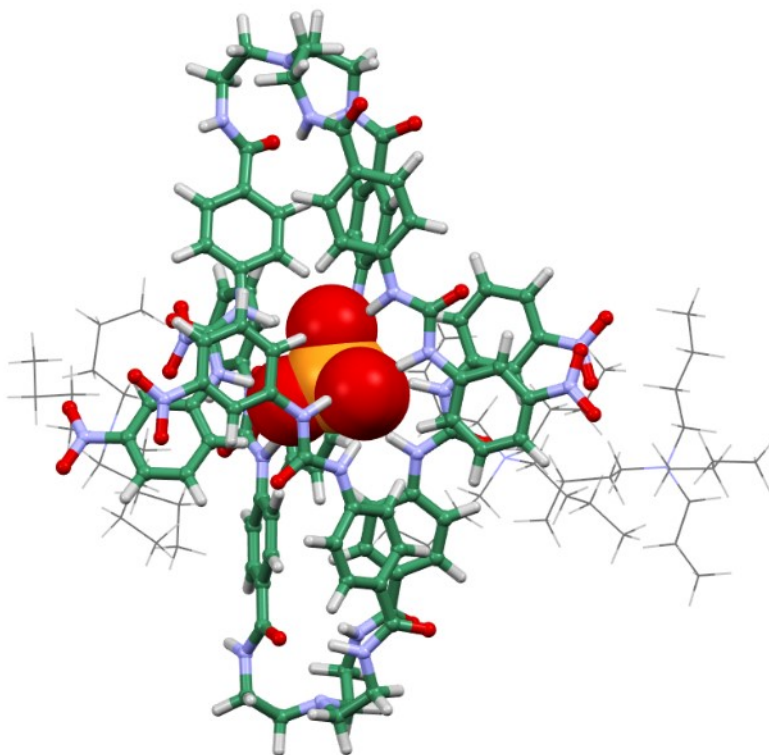

Fig S56. Energy optimized structure of the phosphate complex  $[(n\text{-Bu}_4\text{N})_3 \cdot (2\text{L} \cdot \text{PO}_4)]$  obtained from DFT calculations.

## Electronic Supplementary Information

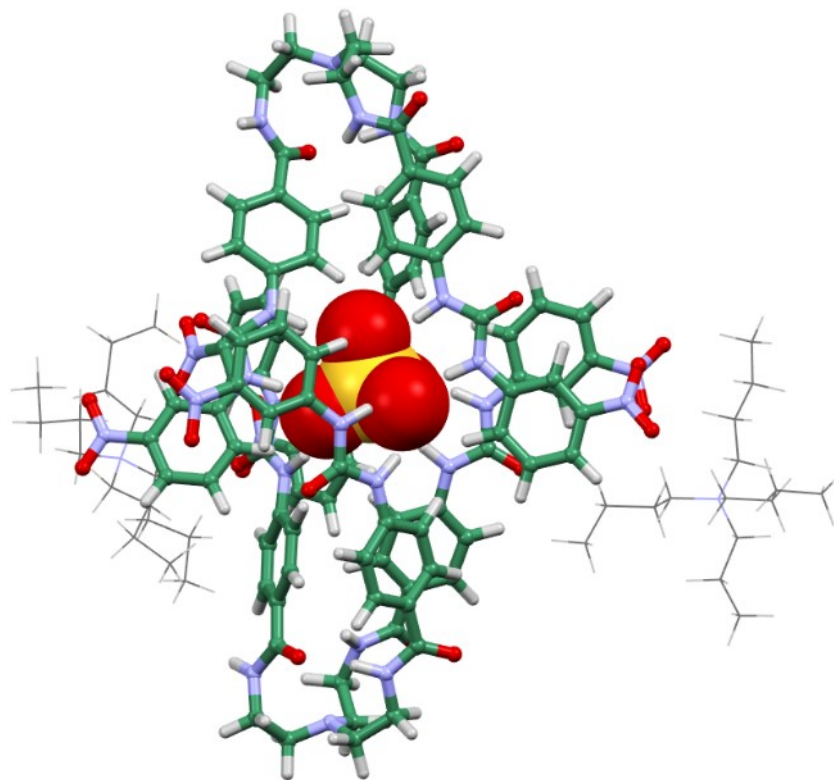

Fig S57. Energy optimized structure of the sulfate complex  $[(n\text{-Bu}_4\text{N})_2(2\text{L}\cdot\text{SO}_4)]$  obtained from DFT calculations.

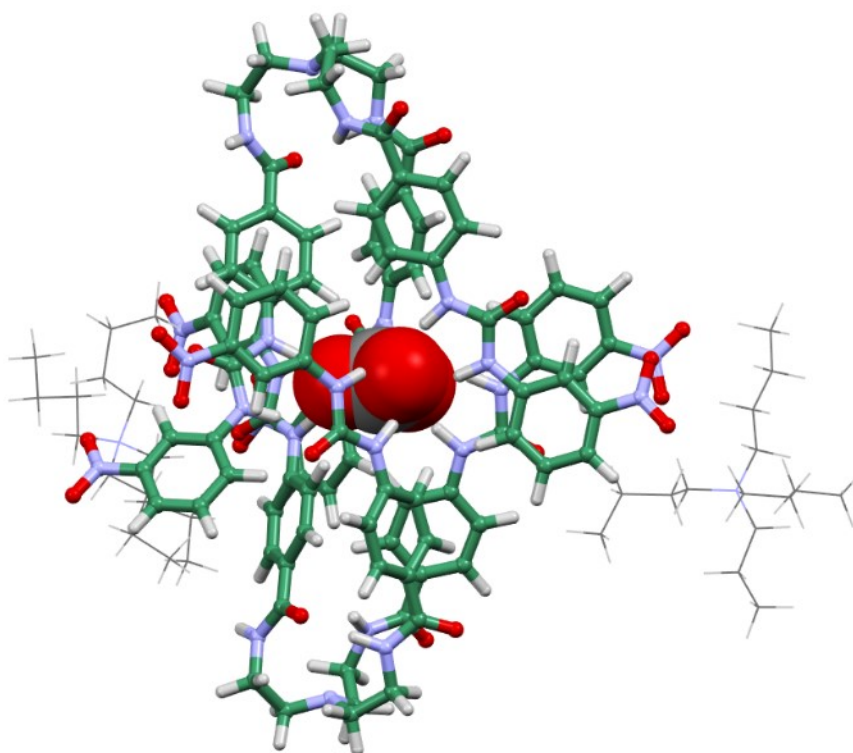

Fig S58. Energy optimized structure of the carbonate complex  $[(n\text{-Bu}_4\text{N})_2(2\text{L}\cdot\text{CO}_3)]$  obtained from DFT calculations.

## Electronic Supplementary Information

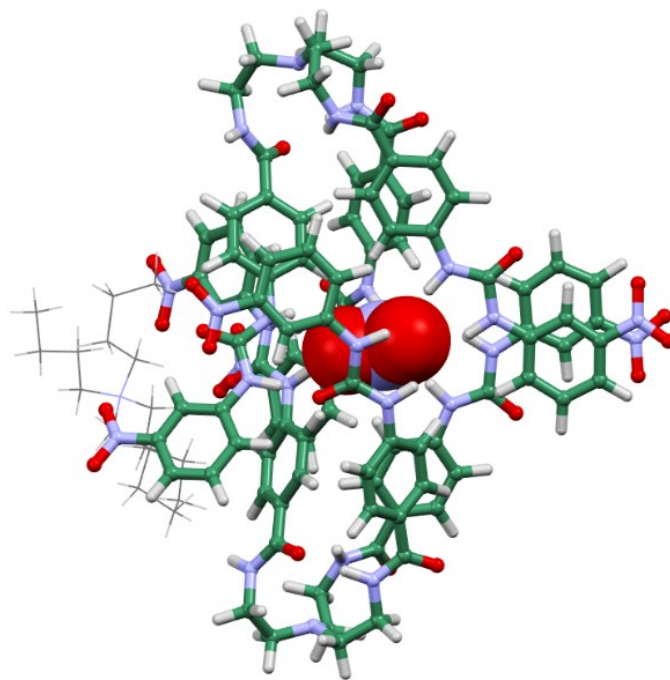

Fig S59. Energy optimized structure of the nitrate complex  $[(n\text{-Bu}_4\text{N})\cdot(2\text{L}\cdot\text{NO}_3)]$  obtained from DFT calculations.

### 8. NMR spectra of arsenate complexes obtained at different pH from extraction experiments.

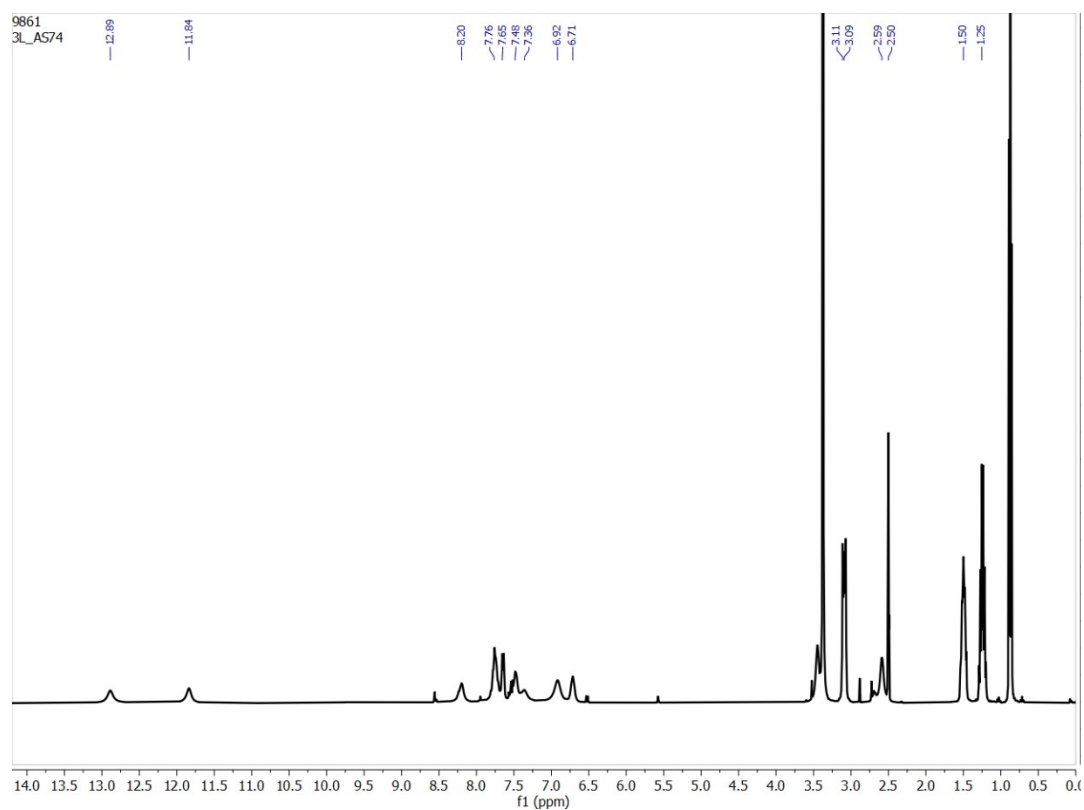

Fig. S60.  $^1\text{H}$ -NMR spectrum of the arsenate complex  $[(n\text{-Bu}_4\text{N})_3\cdot(2\text{L}\cdot\text{AsO}_4)]$  ( $\text{DMSO-d}_6$ ) extracted from an aqueous solution of  $\text{Na}_2\text{HAsO}_4$  of pH 7.4 by **L** in DCM.

## Electronic Supplementary Information

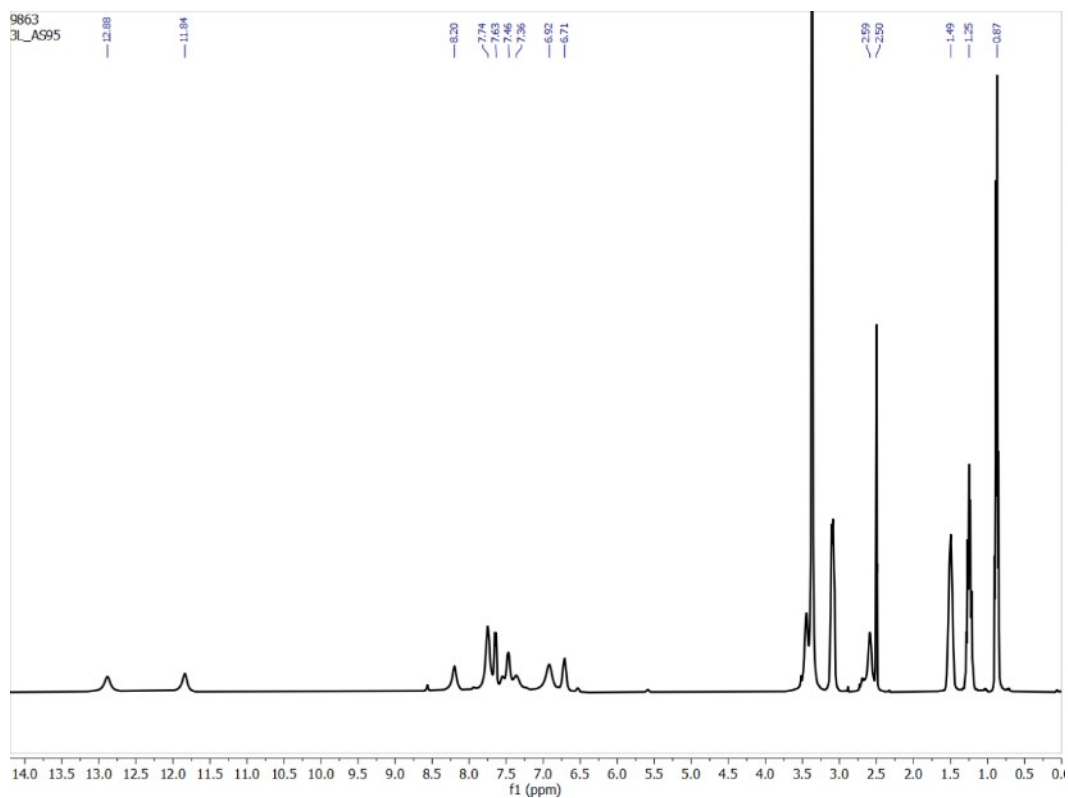

Fig. S61. <sup>1</sup>H-NMR spectrum of the arsenate complex [(n-Bu<sub>4</sub>N)<sub>3</sub>·(2L·AsO<sub>4</sub>)] (DMSO-d<sub>6</sub>) extracted from an aqueous solution of Na<sub>2</sub>HAsO<sub>4</sub> of pH 9.5 by L in DCM.

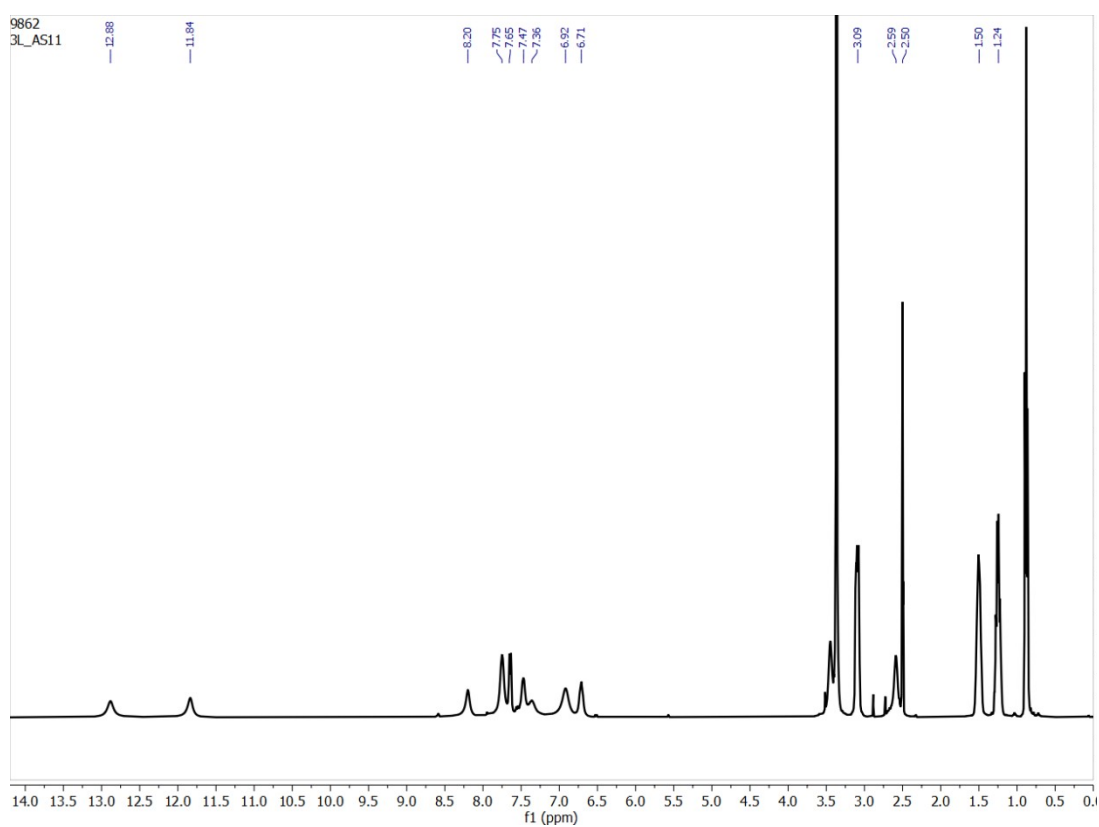

Fig. S62. <sup>1</sup>H-NMR spectrum of the arsenate complex [(n-Bu<sub>4</sub>N)<sub>3</sub>·(2L·AsO<sub>4</sub>)] (DMSO-d<sub>6</sub>) extracted from an aqueous solution of Na<sub>2</sub>HAsO<sub>4</sub> of pH 11 by L in DCM.

## Electronic Supplementary Information

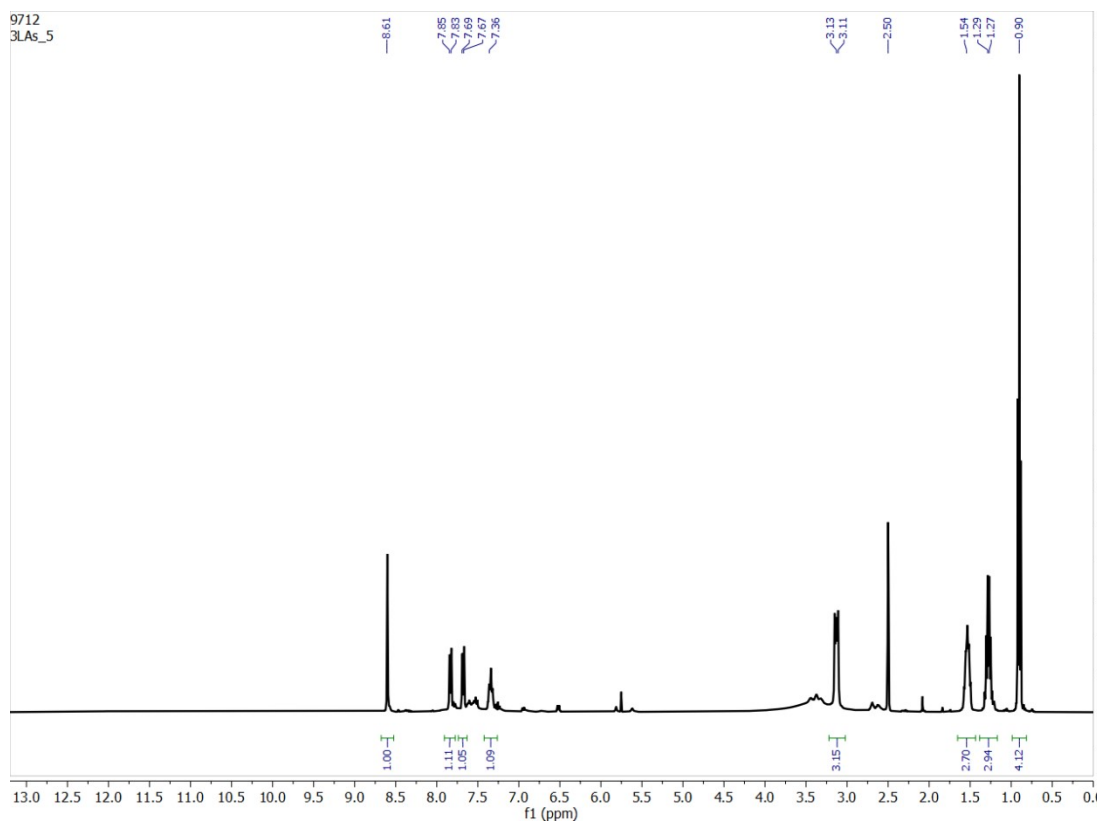

Fig. S63. <sup>1</sup>H-NMR spectrum of the isolated compound (DMSO-d<sub>6</sub>) extracted from an aqueous solution of Na<sub>2</sub>HAsO<sub>4</sub> of pH 5.5 by **L** in DCM.

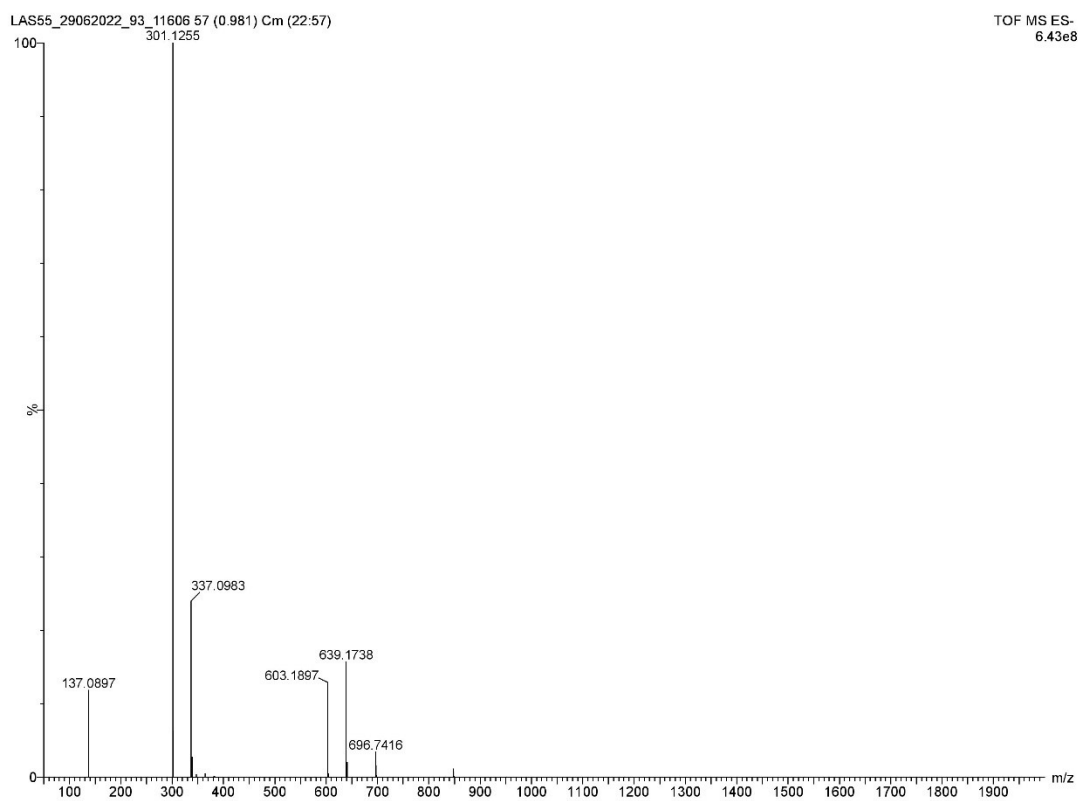

Fig. S64. HR-MS of the isolated compound (acetonitrile) extracted from an aqueous solution of Na<sub>2</sub>HAsO<sub>4</sub> of pH 5.5 by **L** in DCM.

## Electronic Supplementary Information

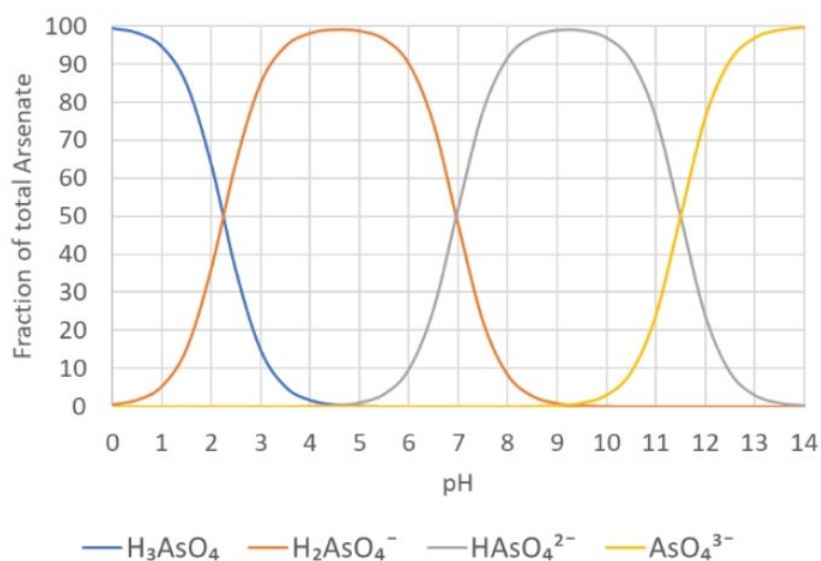

Fig. S65. Distribution of arsenate, As(V) as function of the pH. It is evident that at pH 7, almost equal concentrations of  $\text{H}_2\text{AsO}_4^-$  and  $\text{HAsO}_4^{2-}$  will be present. The net molecular charge of arsenate is negative (-1 or -2) at pH levels between 5 and 7.

### 9. Control experiments

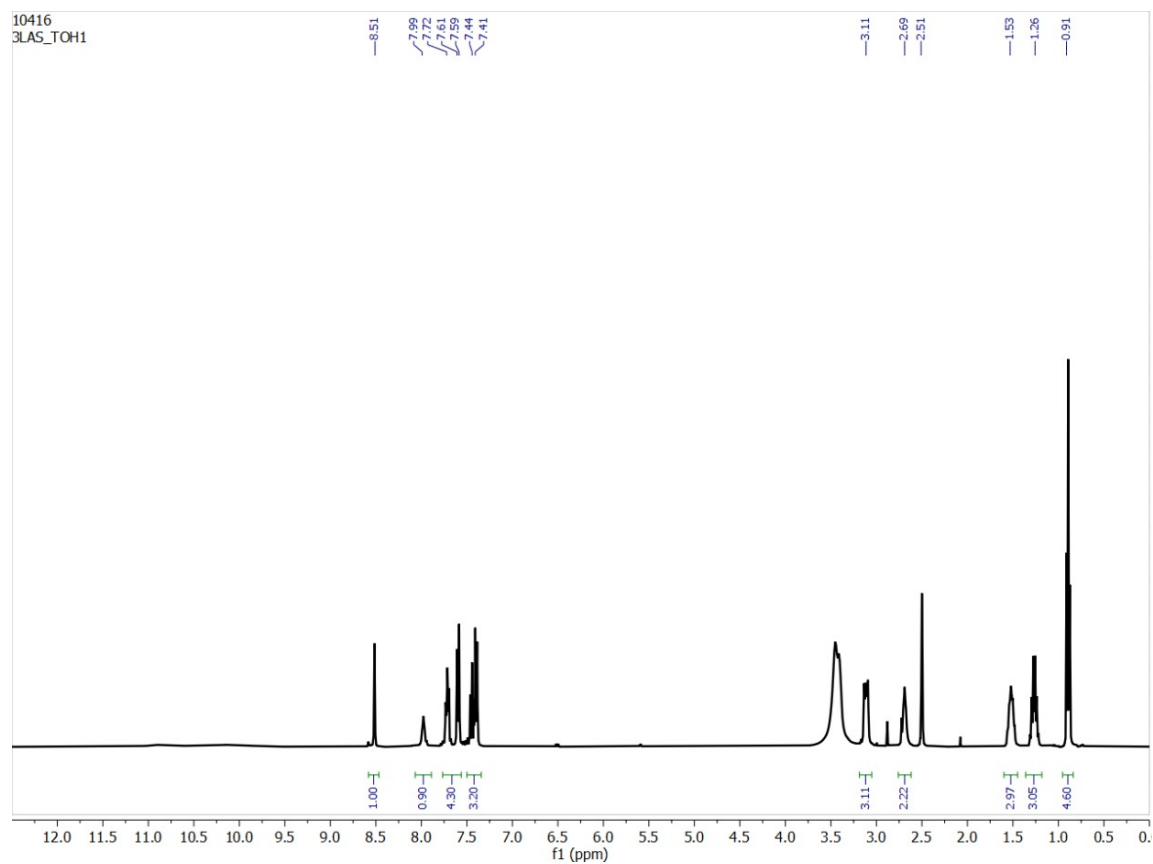

Fig. S66.  $^1\text{H-NMR}$  spectrum of **L** in the presence of 1 equiv. of  $(\text{n-Bu}_4\text{N})\text{OH}$  in  $\text{DMSO-d}_6$ .

## Electronic Supplementary Information

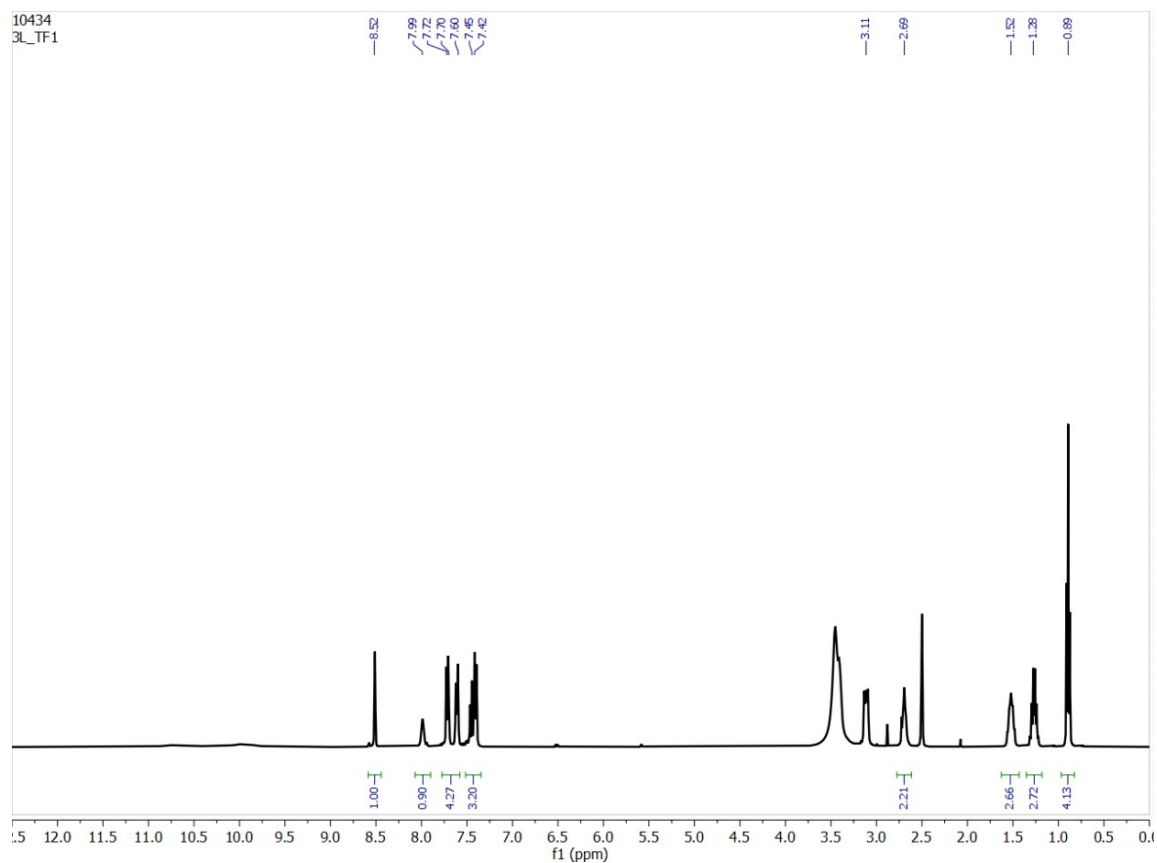

Fig. S67.  $^1\text{H-NMR}$  spectrum of L in the presence of 1 equiv. of  $(\text{n-Bu}_4\text{N})\text{F}$  in  $\text{DMSO-d}_6$ .

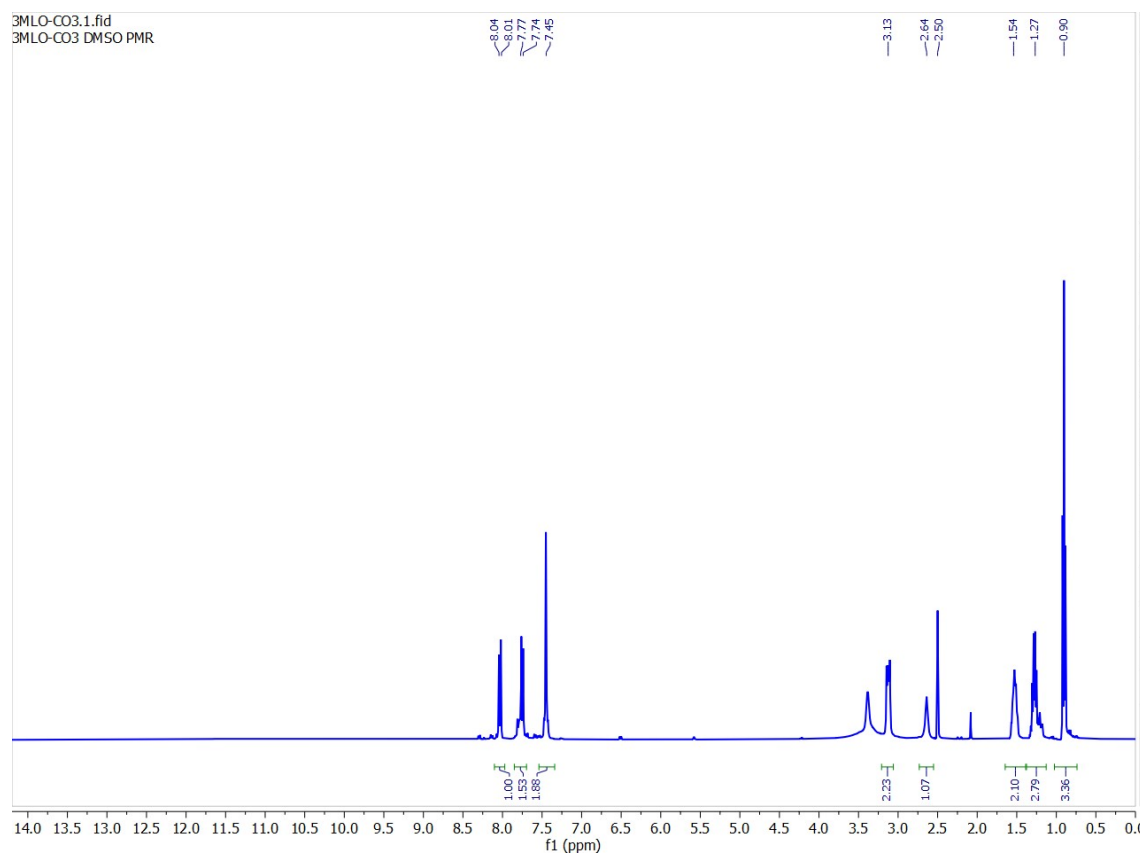

Fig. S68.  $^1\text{H-NMR}$  spectrum of L in the presence of 1 equiv. of  $(\text{n-Bu}_4\text{N})\text{HCO}_3$  in  $\text{DMSO-d}_6$ .



## Electronic Supplementary Information

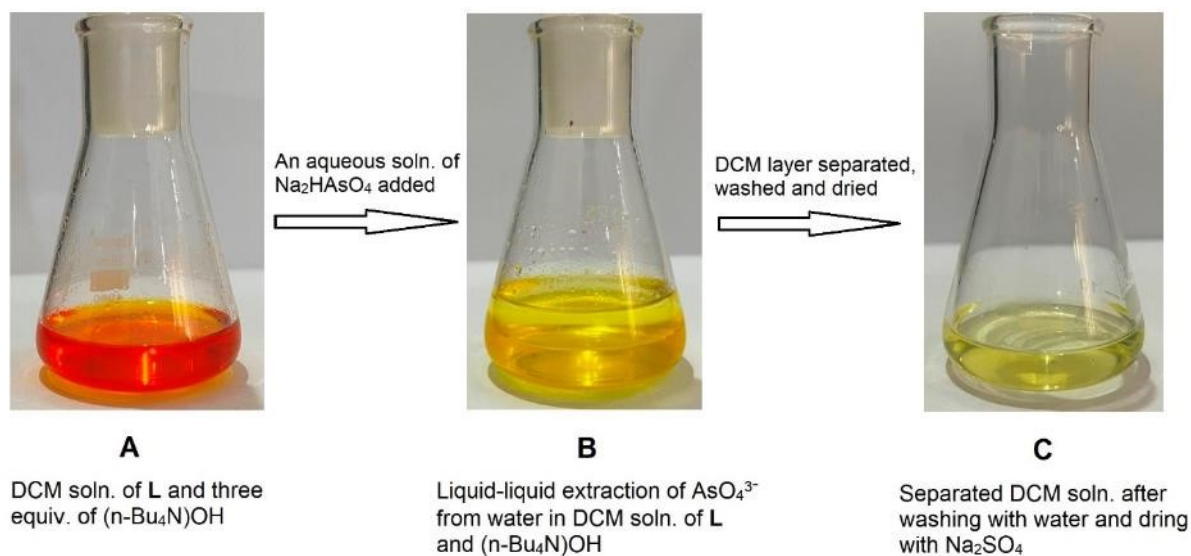

Fig. S69. Photographs of an arsenate extraction experiment showing the changes in colour observed for the (A) dichloromethane (DCM) layer [**L**+3 equiv. (n-Bu<sub>4</sub>N)OH] (B) after the DCM layer stirred for half an hour with an equivalent amount of aqueous Na<sub>2</sub>HAsO<sub>4</sub> solution, and (C) after washing the dichloromethane layer with water followed by treatment with anhydrous Na<sub>2</sub>SO<sub>4</sub>.

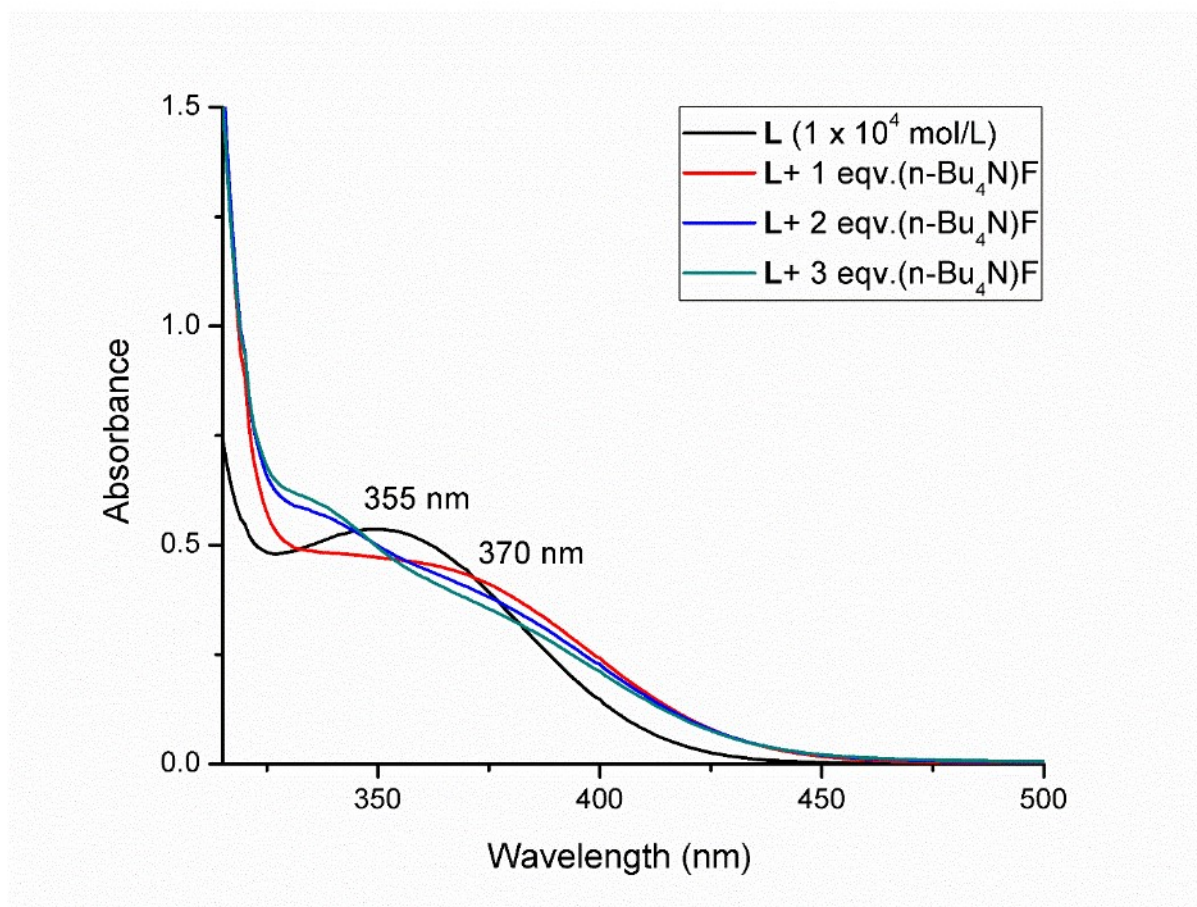

Fig. S70. UV-vis spectra of **L** ( $1 \times 10^5$  mol/L) upon addition of three equivalents of (n-Bu<sub>4</sub>N)F.

## Electronic Supplementary Information

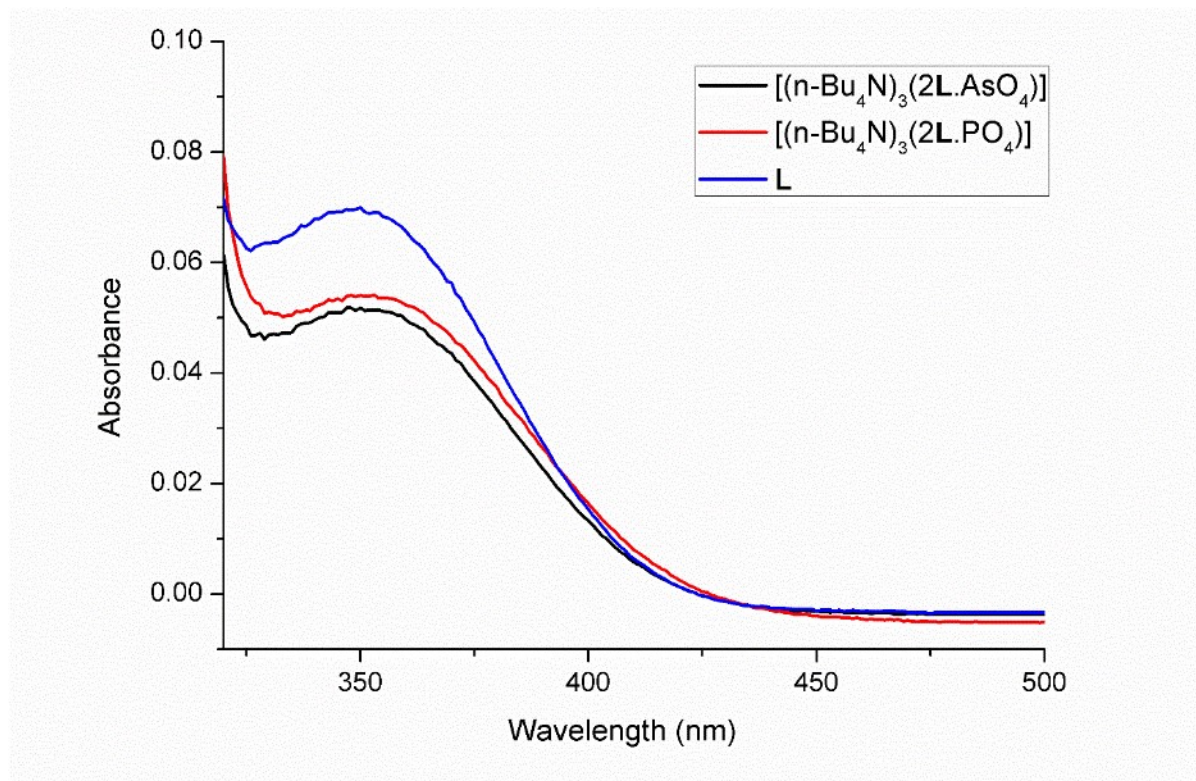

Fig. S71. Comparison of the UV-vis spectra of arsenate and phosphate complexes with **L** in DMSO.

### 10. Single-crystal X-ray Crystallography

Single crystals of  $[(n\text{-Bu}_4\text{N})_3(2\text{L}\cdot\text{AsO}_4)]$  suitable for X-ray diffraction analysis were obtained under ambient conditions (RT) from a DMSO solution of  $[(n\text{-Bu}_4\text{N})_3(2\text{L}\cdot\text{AsO}_4)]$  which was synthesized by liquid-liquid (dichloromethane-water) extraction of arsenate by receptor **L** in the presence of three equivalents of  $[(n\text{-Bu}_4\text{N})\text{OH}]$ . Single crystals of  $[(n\text{-Bu}_4\text{N})_3(2\text{L}\cdot\text{AsO}_4)]$  can reproducibly be obtained under ambient conditions by dissolving 50 mg of the compound in 1 mL of DMSO, which was allowed to crystallize in a 3 mL capacity glass vial.

In each case, a crystal of suitable size was selected from the mother liquor and immersed in paratone oil, and mounted on to a fibre loop holder. Single-crystal XRD data were collected at 120 K with a Bruker SMART APEX-III CCD diffractometer equipped with a fine focus 1.75 kW sealed tube Mo-K $\alpha$  radiation ( $\lambda = 0.71073 \text{ \AA}$ ). The SMART software was used for the data acquisition. Data integration and reduction were undertaken with SAINT and XPREP software.<sup>2</sup> Multi-scan empirical absorption corrections were applied to the data using the SADABS program.<sup>3</sup> The structures were solved by direct methods using SHELXS-97,<sup>4</sup> and refined with full-matrix least-squares on  $F^2$  using SHELXL-97.<sup>5</sup> All non-hydrogen atoms were refined anisotropically, hydrogen atoms attached to all carbon atoms were geometrically fixed (with C-H = 0.95  $\text{\AA}$  for aromatic CH, C-H = 0.99  $\text{\AA}$  for  $\text{CH}_2$  and C-H = 0.98  $\text{\AA}$  for  $\text{CH}_3$ ) and the positional and temperature factors were refined isotropically using riding models (AFIX 43, 23 and 137 with  $U_{\text{iso(H)}} = 1.2 U_{\text{eq(C)}} (\text{CH}, \text{CH}_2)$  and  $1.5 U_{\text{eq(C)}} (\text{CH}_3)$ ). Hydrogen atoms attached to the amide and urea nitrogen atoms were preferred to be positioned geometrically (with N-H = 0.88  $\text{\AA}$ ) and refined isotropically using a riding model (AFIX 43) with  $U_{\text{iso(H)}} = 1.2 U_{\text{eq(N)}}$ .

Single crystal X-ray crystallography data of  $[(n\text{-Bu}_4\text{N})_3(2\text{L}\cdot\text{AsO}_4)]$  CCDC No. 2172773,  $F = \text{C}_{144}\text{H}_{198}\text{AsN}_{29}\text{O}_{28}$ ,  $M = 2858.23$ ,  $T = 120 \text{ K}$ , Space group =  $P-1$ ,  $a = 17.5033(13) \text{ \AA}$ ,  $b = 17.7141(13) \text{ \AA}$ ,  $c = 29.548(2) \text{ \AA}$ ,  $\alpha = 87.526(4)^\circ$ ,  $\beta = 84.116(4)^\circ$ ,  $\gamma = 82.468(4)^\circ$ ,  $V = 9030.5(11) \text{ \AA}^3$ ,  $Z = 2$ ,  $\mu = 0.254 \text{ mm}^{-1}$ ,  $D = 1.051 \text{ g cm}^{-3}$ ,  $F(000) = 3044$ ,  $\theta (\text{max}) = 25.403$ , total reflections = 122362, unique reflections = 32853, observed reflections ( $I > 2s(I)$ ) = 25931, parameters = 1842,  $R_1(F) = 0.0964$ ,  $wR_2(F^2) = 0.2752$ ,  $S = 1.068$ .

## Electronic Supplementary Information

**Table S2.** Hydrogen bond distances (Å) and angles (°) of encapsulated arsenate anion ( $\text{AsO}_4^{3-}$ ) with the urea -NH groups of two receptor molecules (**L**) in  $[(n\text{-Bu}_4\text{N})_3 \cdot (2\text{L} \cdot \text{AsO}_4)]$  crystal (D = hydrogen bond donor and A = hydrogen bond acceptor).

| D-H...A    | N...O (Å) | N-H...O (Å) | N-H...O (°) |
|------------|-----------|-------------|-------------|
| N2B-H...O1 | 2.873 (5) | 2.057       | 153.7       |
| N2C-H...O1 | 2.876 (5) | 2.070       | 151.7       |
| N3C-H...O2 | 2.734 (5) | 1.862       | 171.1       |
| N2F-H...O2 | 2.743 (5) | 1.905       | 158.7       |
| N3F-H...O2 | 2.800 (5) | 1.971       | 156.6       |
| N2E-H...O3 | 2.786 (5) | 1.951       | 157.8       |
| N3E-H...O3 | 2.857 (5) | 2.028       | 156.4       |
| N3A-H...O3 | 2.706 (5) | 1.831       | 172.7       |
| N3B-H...O4 | 2.752 (5) | 1.876       | 173.4       |
| N2D-H...O4 | 2.698 (5) | 1.863       | 157.7       |
| N3D-H...O4 | 2.715 (5) | 1.904       | 152.6       |

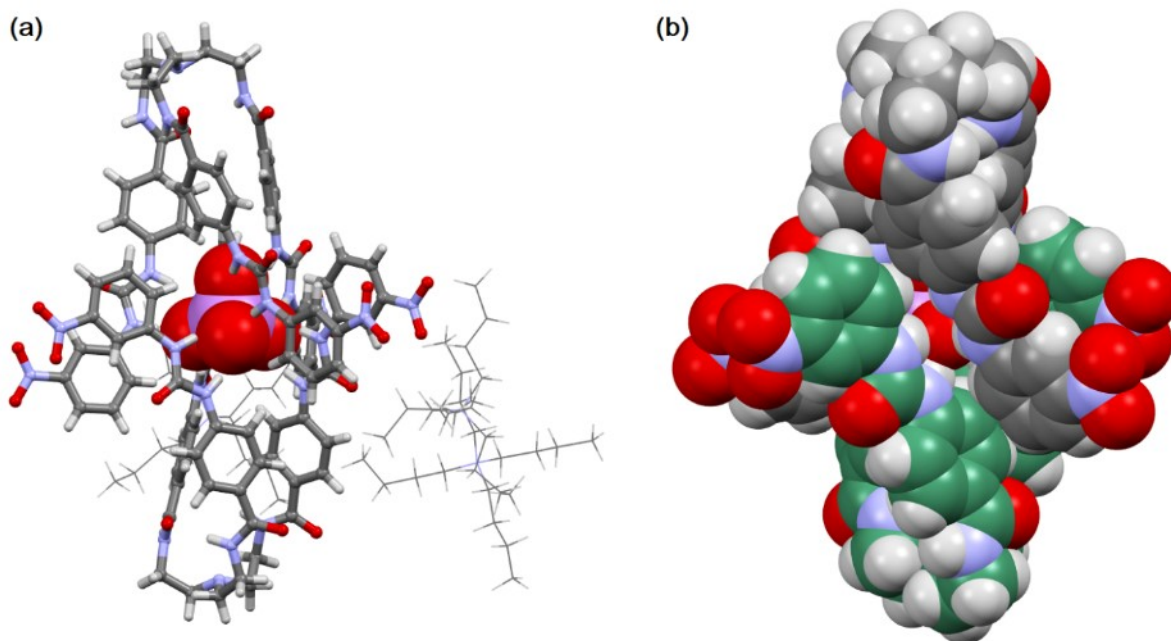

Fig S72. (a) Asymmetric unit of the X-ray structure of the arsenate complex  $[(n\text{-Bu}_4\text{N})_3 \cdot (2\text{L} \cdot \text{AsO}_4)]$  (b) Space-filling representation of  $(2\text{L} \cdot \text{AsO}_4)^{3-}$  in the X-ray structure of  $[(n\text{-Bu}_4\text{N})_3 \cdot (2\text{L} \cdot \text{AsO}_4)]$  (cations are not shown).



## Electronic Supplementary Information

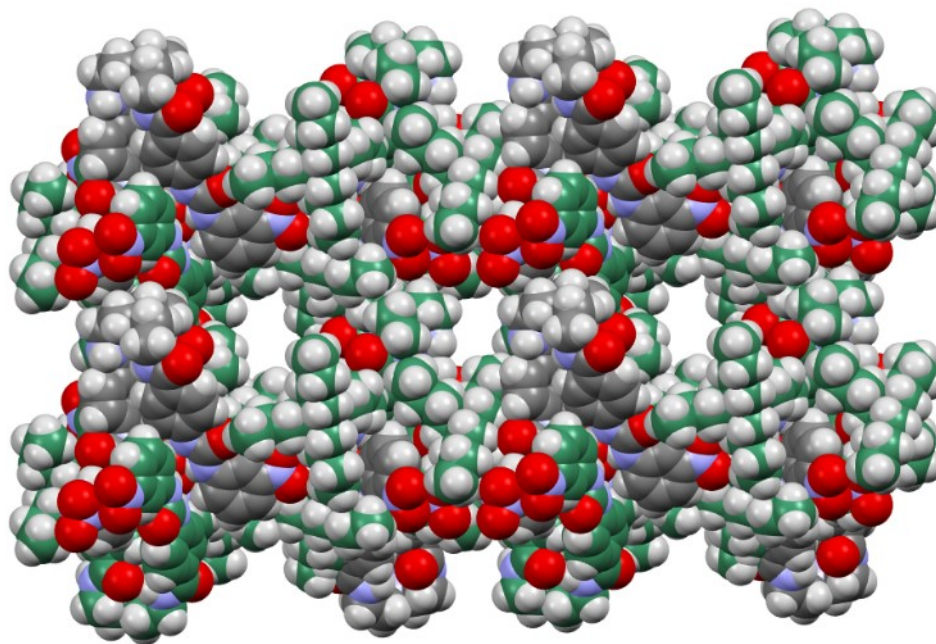

Fig. S73. Packing diagram of the X-ray structure of the arsenate complex  $[(n\text{-Bu}_4\text{N})_3 \cdot (2\text{L} \cdot \text{AsO}_4)]$  in space-filling presentation as viewed along crystallographic  $a$ -axis.

### References

1. S. K. Dey and C. Janiak, RSC Adv., 2020, 10, 14689–14693.
2. SMART, SAINT and XPREP, Siemens Analytical X-ray Instruments Inc., Madison, WI, 1995.
3. G. M. Sheldrick, SADABS: Software for Empirical Absorption Correction; University of Gottingen, Institute for Anorganische Chemie de Universitat, Gottingen, Germany, 1999–2003.
4. G. M. Sheldrick, SHELXS-97, University of Gottingen, Germany, 1997.
5. G. M. Sheldrick, SHELXL-97: Program for Crystal Structure Refinement, University of Gottingen, Gottingen, Germany, 1997.
